# Supplementary material
Source: PubMed Central journal article supplement (PMC3640414)

# Supporting Information:

## Optimization of 3,5-Dimethylisoxazole Derivatives as Potent Bromodomain Ligands

David S. Hewings,<sup>†,‡</sup> Oleg Fedorov,<sup>‡</sup> Panagis Filippakopoulos,<sup>‡</sup> Sarah Martin,<sup>‡</sup> Sarah Picaud,<sup>‡</sup> Anthony Tumber,<sup>‡</sup> Christopher Wells,<sup>‡</sup> Monica M. Olcina,<sup>§</sup> Katherine Freeman,<sup>†</sup> Andrew Gill,<sup>§</sup> Alison J. Ritchie,<sup>§</sup> David W. Sheppard,<sup>§</sup> Angela J. Russell,<sup>†</sup> Ester M. Hammond, Stefan Knapp,<sup>‡</sup> Paul, E. Brennan<sup>‡</sup> and Stuart J. Conway<sup>†\*</sup>

<sup>†</sup>Department of Chemistry, Chemistry Research Laboratory, University of Oxford, Mansfield Road, Oxford, OX1 3TA, UK.

<sup>‡</sup>Nuffield Department of Clinical Medicine, Structural Genomics Consortium, University of Oxford, Old Road Campus Research Building, Roosevelt Drive, Oxford, OX3 3TA, UK.

<sup>§</sup>Cancer Research UK/MRC Gray Institute for Radiation Oncology and Biology, Department of Oncology, University of Oxford, Old Road Campus Research Building, Oxford, OX3 7DQ, UK.

<sup>¶</sup>BioFocus, Chesterford Research Park, Saffron Walden, Essex, CB10 1XL, UK.

\*To whom correspondence should be addressed: stuart.conway@chem.ox.ac.uk, telephone: +44 (0)1865 285 109, fax: +44 (0)1865 285 002.

### Table of Contents

|                                                                                                                           |     |
|---------------------------------------------------------------------------------------------------------------------------|-----|
| <b>Supporting Figure S1.</b> Enantiomeric purity determination of <b>8</b> by chiral HPLC.                                | S2  |
| <b>Supporting Figure S2.</b> Stability of (+)- <b>8</b> in aqueous buffer.                                                | S2  |
| <b>Supporting Figure S3.</b> SPR steady state affinity analysis of <i>R</i> - and <i>S</i> - <b>8</b> binding to BRD4(1). | S3  |
| <b>Supporting Figure S4.</b> Comparison of the BRD4(1) and CREBBP bromodomains.                                           | S4  |
| <b>Supporting Figure S5.</b> BRD4(1) and CREBBP bromodomain sequence alignment.                                           | S5  |
| <b>Supporting Figure S6.</b> MTS viability assays for MV4;11, A549 and H1975 cells.                                       | S6  |
| <b>Supporting Figure S7.</b> Clonogenic assay for A549 and H1975 cells.                                                   | S7  |
| <b>Supporting Table S1</b> Steady state analysis parameters for <i>R</i> - and <i>S</i> - <b>8</b> binding to BRD4(1).    | S7  |
| <b>Supporting Table S2.</b> Effect of <b>8</b> and (+)-JQ1 in cancer cells after 72 h.                                    | S7  |
| <b>Cloning, Protein Expression and Purification</b>                                                                       | S8  |
| <b>Protein Crystallization</b>                                                                                            | S8  |
| <b>Data collection and Structure Solution</b>                                                                             | S8  |
| <b>Data Collection and Refinement Statistics</b>                                                                          | S10 |
| <b>Further General Experimental</b>                                                                                       | S11 |
| <b>Synthesis and Characterization of Compounds 10, 11, 18-20</b>                                                          | S14 |
| <b>Further Characterization for Compounds 8, 9, 12-17, 21-23</b>                                                          | S19 |
| <b>References</b>                                                                                                         | S21 |
| <b><sup>1</sup>H, <sup>13</sup>C and <sup>19</sup>F NMR Spectra</b>                                                       | S23 |

### Abbreviations used in Supporting Information:

DMEM: Dulbecco's modified Eagle's medium; MTS: (3-(4,5-dimethylthiazol-2-yl)-5-(3-carboxymethoxyphenyl)-2-(4-sulfophenyl)-2H-tetrazolium); RuPhos: 2-dicyclohexylphosphino-2',6'-diisopropoxybiphenyl; WST-1: water-soluble tetrazolium 1.

**Supporting Figure S1.** Enantiomeric purity determination of **8** by chiral HPLC.

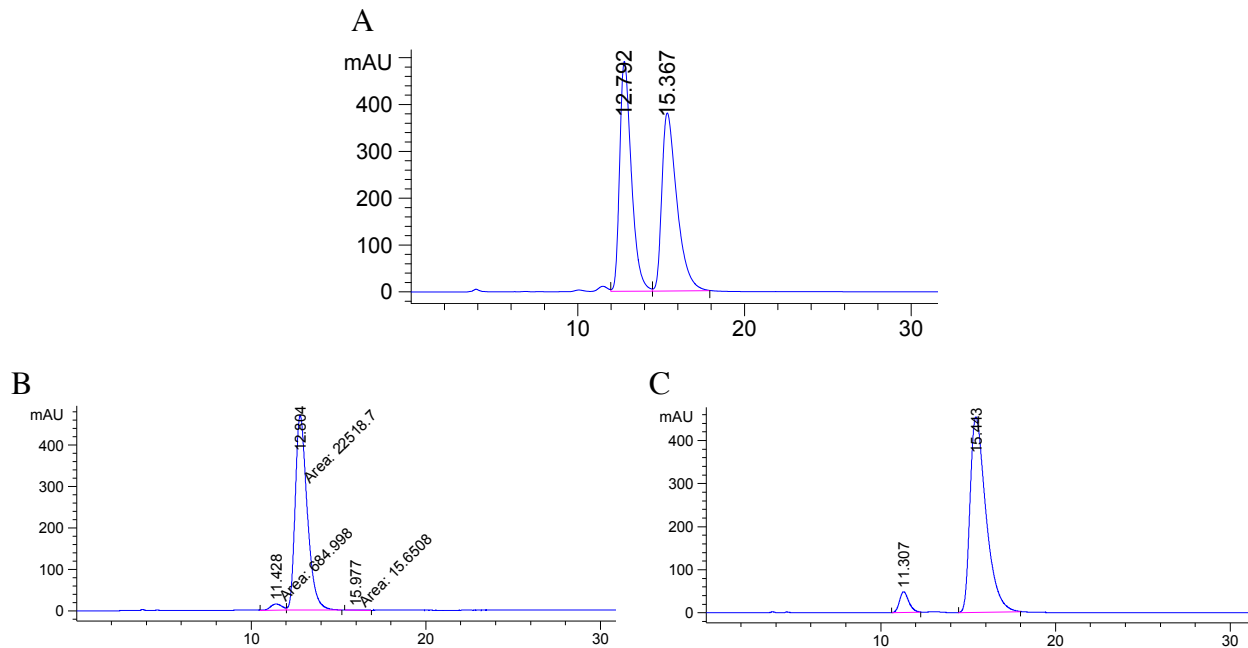

**A:** Racemic **8**; **B:** (–)-**8**; **C:** (+)-**8**. UV absorbance monitored at 230 nm. Analytical chiral HPLC indicates >99% ee in both cases.

**Supporting Figure S2.** Stability of (+)-**8** in aqueous buffer.

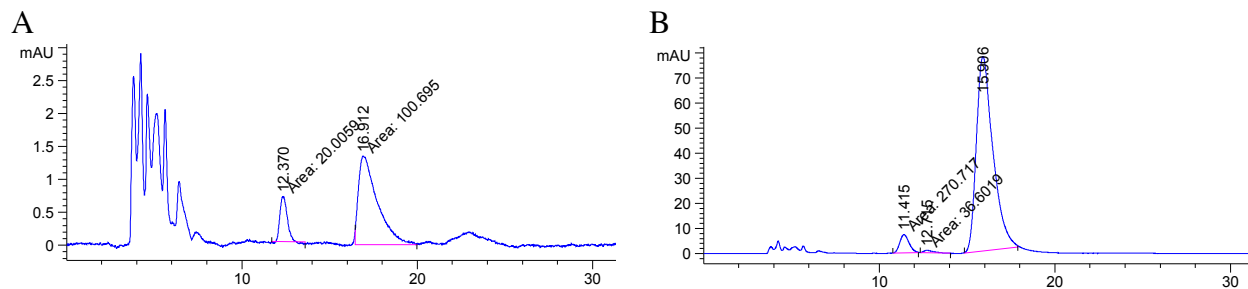

**A:** Blank (buffer only); **B:** (+)-**8** after 2 h in AlphaScreen buffer. Analytical chiral HPLC indicates >98% ee and 95% purity.

**Supporting Figure S3.** SPR steady state affinity analysis of *R*- and *S*-**8** binding to BRD4(1)

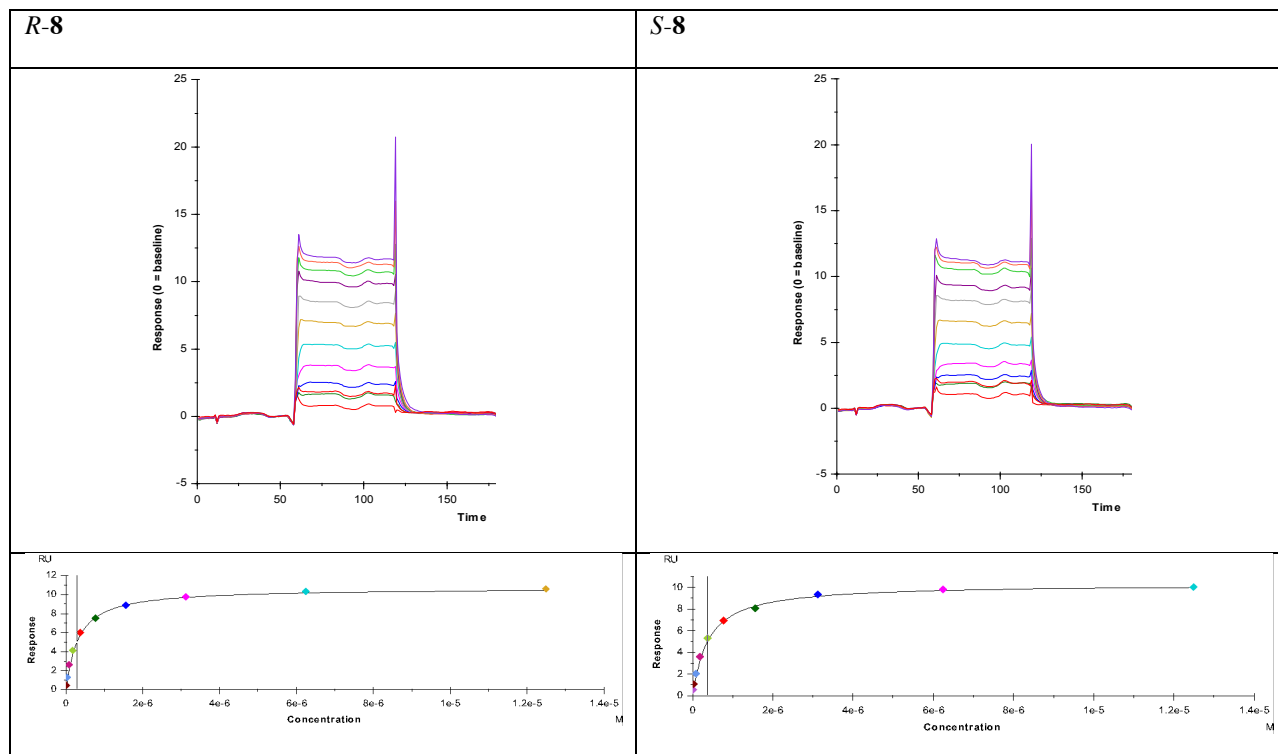

Response analyzed over a concentration range of 0.024  $\mu\text{M}$  to 12.5  $\mu\text{M}$ .

**Supporting Figure S4.** An overlay of X-ray crystal structures of BRD4(1) (PDB ID, 3UVW, key residues carbon = green) bound to H4<sub>1-11</sub>KAc5,8 (KAc carbon = purple) and the CREBBP bromodomain (PDB ID, 3P1F key residues carbon = yellow). Residue numbers for BRD4(1) are shown in gray; residue numbers for CREBBP are shown in black.

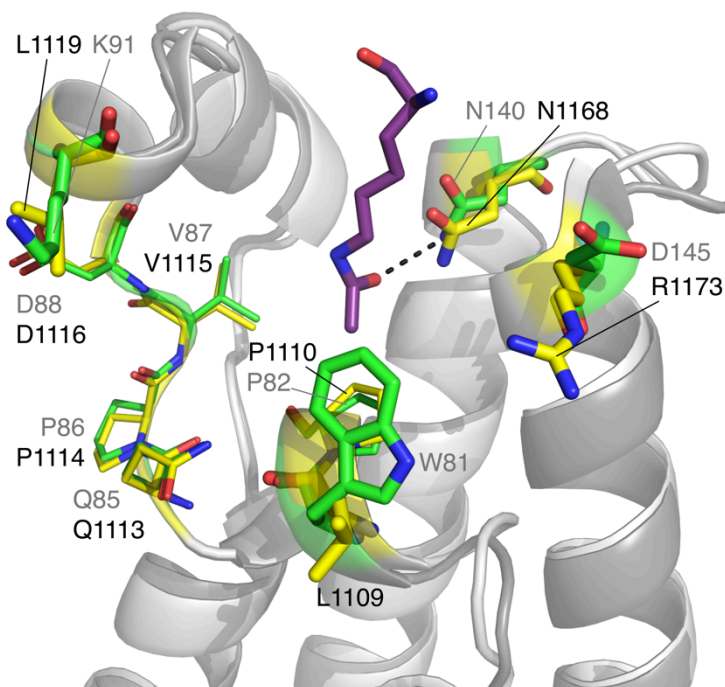

Although the BRD4(1) and CREBBP bromodomains adopt similar protein folds, there are a number of differences between key residues. The sequence alignment of BRD4(1) (3SVG) and CREBBP (3SVH) bromodomains performed in clustalX is shown in Figure S5. Three important residues that differ are W81, K91 and D145 in BRD4(1), which correspond to L1109, L1119 and R1173 in CREBBP, respectively (Figure S4). These residues alter the nature of the two ZA loop regions to which the acetylated peptides bind. In particular, CREBBP does not have a WFP shelf region in the same way as BRD4(1) and the other BET bromodomains. However, the loop region that forms the ZA channel and binds to two waters molecules, which comprises P82, Q85, P86, V87 and D88, is conserved in CREBBP (P1110, Q1113, P1114, V1115 and D1116) (Figure S5).

Consequently, the ZA channel water molecules are bound in a very similar manner by both bromodomains and therefore comparison between them is valid.

**Supporting Figure S5.** The sequence alignment of BRD4(1) (3SVG) and CREBBP (3SVH) bromodomains performed in clustalX. The residues that bind to the ZA channel water molecules are highlighted by the red box.

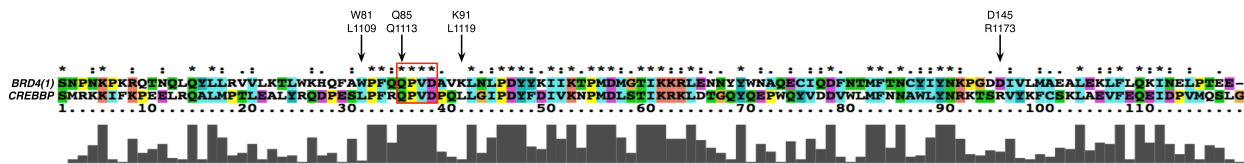

**Supporting Figure S6. MTS viability assays for MV4;11, A549 and H1975 cells.**

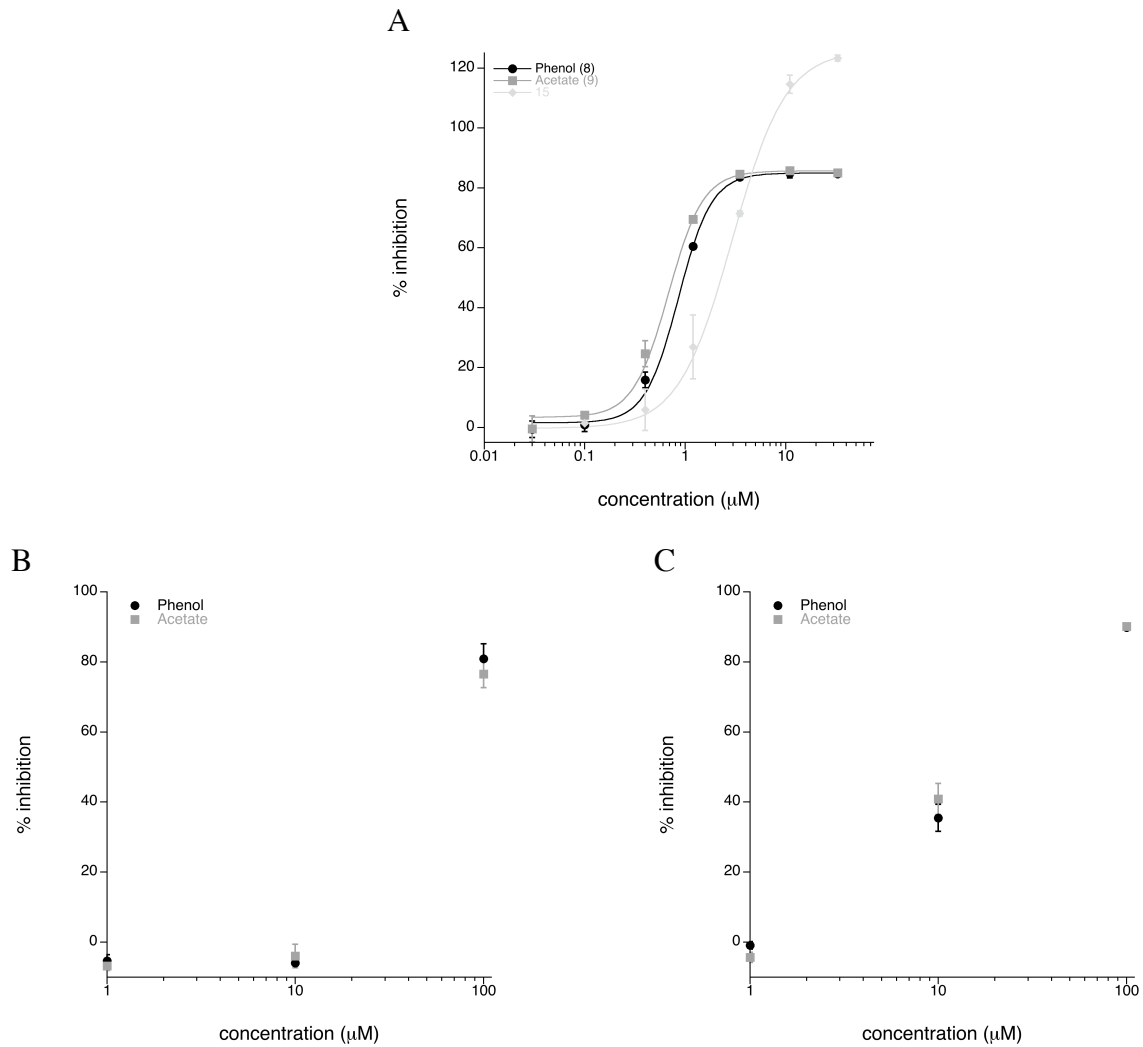

Viability as determined by MTS assay after 72 h of treatment with **8** (phenol), **9** (acetate) or **15**. **A**: IC<sub>50</sub> determination for compounds **8** and **9** in MV4;11 AML cell line; 3-point viability assays for A549 (**B**) and H1975 (**C**).

**Supporting Figure S7.** Clonogenic assay for A549 and H1975 cells.

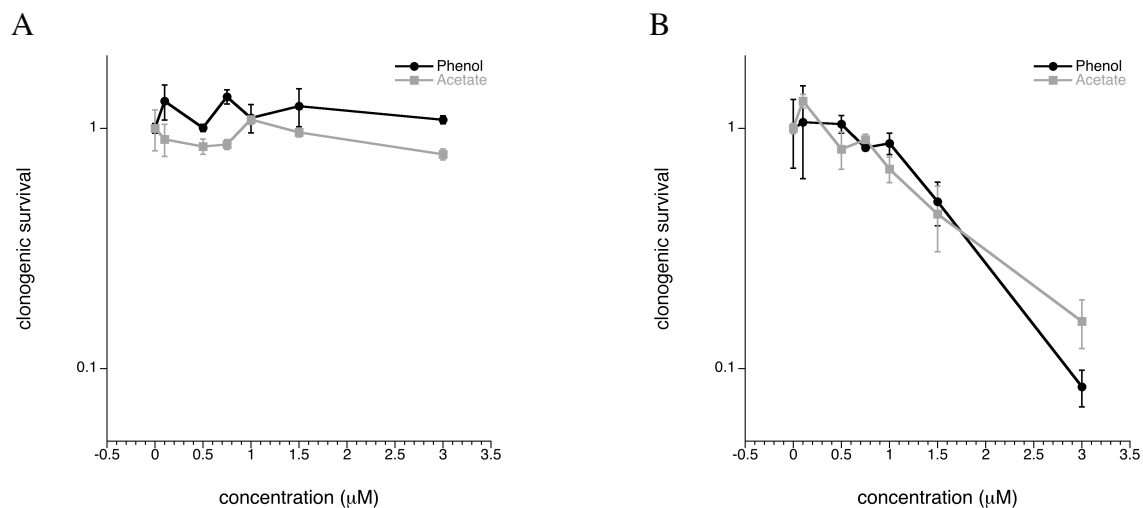

Clonogenic (colony formation) assay for lung adenocarcinoma cell lines A549 (**A**) and H1975 (**B**) after treatment with **8** (phenol) or **9** (acetate).

**Supporting Table S1.** Steady state analysis parameters for *R*- and *S*- **8** binding to BRD4(1)

|                | $K_D$ Steady State Analysis ( $\mu\text{M}$ ) | $R_{\text{max}}$ (RU) | % $\text{TR}_{\text{max}}$ | $\text{Chi}^2$ (RU) |
|----------------|-----------------------------------------------|-----------------------|----------------------------|---------------------|
| <i>R</i> (n=1) | 0.30                                          | 11.1                  | 34.6                       | 0.014               |
| <i>R</i> (n=2) | 0.41                                          | 9.0                   | 28.0                       | 0.052               |
| <i>S</i> (n=1) | 0.37                                          | 10.5                  | 32.8                       | 0.013               |
| <i>S</i> (n=2) | 0.40                                          | 8.7                   | 27.1                       | 0.021               |

**Supporting Table S2.** Effect of **8** and (+)-JQ1 in cancer cells after 72 h.

| Cell line                      | $\text{IC}_{50}$ ( $\mu\text{M}$ ) |         |
|--------------------------------|------------------------------------|---------|
|                                | <b>8</b>                           | (+)-JQ1 |
| U2OS (osteosarcoma)            | 19                                 | 2.9     |
| HeLa (cervical adenocarcinoma) | 24                                 | 2.1     |

Viability was assessed after 72 h incubation using MTS.

**Cloning, Protein Expression and Purification:** cDNA encoding human BRD4 (NCBI accession numbers NP 055114.1) was obtained from FivePrime and was used as template to amplify the N-terminal bromodomain region of the protein. Protein expression and purification was carried out as previously described.<sup>1</sup>

**Protein Crystallization:** Aliquots of the purified proteins were set up for crystallization using a mosquito<sup>®</sup> crystallization robot (TTP Labtech, Royston UK). Coarse screens were typically setup onto Greiner 3-well plates using three different drop ratios of precipitant to protein per condition (100+50 nL, 75+75 nL and 50+100 nL). Initial hits were optimized further using Greiner 1-well plates and scaling up the drop sizes in steps. All crystallizations were carried out using the sitting drop vapor diffusion method at 4 °C. BRD4(1) crystals with (*R*)-(-)-**8** (5 mM final concentration) were grown by mixing 200 nL of the protein (9.8 mg/mL) with 100 nL of reservoir solution containing 0.2 M NaI, 20 % PEG3350 and 10 % ethylene glycol. BRD4(1) crystals with (*S*)-(+)-**8** (5 mM final concentration) were grown by mixing 200 nL of the protein (14 mg/mL) with an 100 nL of reservoir solution containing 0.2 M Na/KPO<sub>4</sub>, 20 % PEG3350 and 10 % EtGly.

**Data Collection and Structure Solution:** Crystals were cryo-protected using the well solution supplemented with additional ethylene glycol and were flash frozen in liquid nitrogen. Data were collected at a Rigaku FRE Superbright using an RAXIS-VI detector at 1.52 Å. Indexing and integration was carried out using XDS<sup>2,3</sup> and scaling was performed with SCALA.<sup>4</sup> Initial phases were calculated by molecular replacement with PHASER<sup>5</sup> using an ensemble of known bromodomain models (PDB IDs 2OSS, 2OUO, 2GRC, 2OO1, 3DAI, 3D7C, 3DWY). Initial models were built by ARP/wARP<sup>6</sup> and building was completed manually with COOT.<sup>7</sup> Refinement was carried out in REFMAC5.<sup>8</sup> Thermal motions were analyzed using TLSMD<sup>9</sup> and



hydrogen atoms were included in late refinement cycles. Data collection and refinement statistics can be found in Supporting Table S1. The models and structure factors have been deposited with PDB accession codes: 4J0R (BRD4(1)/ (*R*)-(-)-**8** complex) and 4J0S (BRD4(1)/ (*S*)-(+)-**8** complex).

## Data collection and refinement statistics

| Data Collection                                      |                                               |       |       |                                               |       |       |
|------------------------------------------------------|-----------------------------------------------|-------|-------|-----------------------------------------------|-------|-------|
| Protein                                              | BRD4(1)                                       |       |       | BRD4(1)                                       |       |       |
| Ligand                                               | <i>(R)</i> -(-)- <b>8</b>                     |       |       | <i>(S)</i> -(+)- <b>8</b>                     |       |       |
| PDB ID                                               | 4J0R                                          |       |       | 4J0S                                          |       |       |
| Space group                                          | P2 <sub>1</sub> 2 <sub>1</sub> 2 <sub>1</sub> |       |       | P2 <sub>1</sub> 2 <sub>1</sub> 2 <sub>1</sub> |       |       |
| Cell dimensions: a, b, c (Å)                         | 38.60                                         | 42.86 | 79.43 | 38.65                                         | 42.98 | 79.55 |
| α, β, γ (deg)                                        | 90.00                                         | 90.00 | 90.00 | 90.00                                         | 90.00 | 90.00 |
| Resolution* (Å)                                      | 1.72 (1.81-1.72)                              |       |       | 1.84 (1.94-1.84)                              |       |       |
| Unique observations*                                 | 14500 (2056)                                  |       |       | 11949 (1676)                                  |       |       |
| Completeness* (%)                                    | 99.5 (99.0)                                   |       |       | 99.2 (98.1)                                   |       |       |
| Redundancy*                                          | 4.6 (4.5)                                     |       |       | 4.6 (4.6)                                     |       |       |
| Rmerge*                                              | 0.119 (0.766)                                 |       |       | 0.160 (0.767)                                 |       |       |
| I/σI*                                                | 10.3 (2.0)                                    |       |       | 8.4 (2.0)                                     |       |       |
| Refinement Statistics                                |                                               |       |       |                                               |       |       |
| Resolution (Å)                                       | 1.72                                          |       |       | 1.84                                          |       |       |
| R <sub>work</sub> / R <sub>free</sub> (%)            | 15.64/22.01                                   |       |       | 15.94/22.58                                   |       |       |
| Number of atoms<br>(protein/other/water)             | 1057/39/188                                   |       |       | 1059/38/156                                   |       |       |
| B-factors (Å <sup>2</sup> )<br>(protein/other/water) | 15.46/15.19/25.54                             |       |       | 16.04/14.53/24.56                             |       |       |
| r.m.s.d bonds (Å)                                    | 0.015                                         |       |       | 0.016                                         |       |       |
| r.m.s.d angles (°)                                   | 1.561                                         |       |       | 1.571                                         |       |       |
| Ramachadran Favoured (%)                             | 98.31                                         |       |       | 98.31                                         |       |       |
| Allowed (%)                                          | 1.61                                          |       |       | 1.61                                          |       |       |
| Disallowed (%)                                       | 0.00                                          |       |       | 0.00                                          |       |       |

\* Values in parentheses correspond to the highest resolution shell.

## Further General Experimental

**Preparative chiral HPLC** for the separation of (-)-**8** and (+)-**8** was carried out on a CHIRALCEL OG column (2 × 25 cm) using an Agilent 1260 Infinity Series instrument, eluent hexane:2-propanol 85:15, flow rate 18 mL/min. UV absorbance was monitored at 230 nm. Retention times for (-) and (+) enantiomers were 18.7 and 24.4 min respectively.

**Analytical chiral HPLC** was carried out on a CHIRALCEL OG column (4.6 × 250 mm) using an Agilent 1200 Series instrument, eluent hexane:2-propanol 80:20, flow rate 0.80 mL/min. UV absorbance was monitored at 230 nm. Retention times for (-)-**8** and (+)-**8** enantiomers were 12.8 and 15.4 min respectively. [Enantiomeric excess of both enantiomers was >99%.]

**Analytical thin layer chromatography** (TLC) was carried out on Merck silica gel 60 F<sub>254</sub> aluminum-supported thin layer chromatography sheets. Visualization was by absorption of UV light ( $\lambda_{\text{max}}$  254 nm), or thermal development after dipping in an aqueous solution of potassium permanganate, potassium carbonate and sodium hydroxide.

**Flash column chromatography** was performed on a Biotage SP1 or SP4 system using KP-Sil™ cartridges.

**Anhydrous solvents** were obtained under the following conditions: dry 1,4-dioxane, dry DMF and dry MeOH were purchased from Sigma-Aldrich UK in SureSeal™ bottles and used without further purification; THF and Et<sub>2</sub>O were dried over activated basic alumina and stored over activated 3 Å molecular sieves under an argon or nitrogen atmosphere prior to use.

**Chemicals** were purchased from Acros UK, Sigma-Aldrich UK, Alfa Aesar UK, Fisher UK or Fluka UK. Where appropriate and if not stated otherwise, all non-aqueous reactions were performed in a flame-dried flask under an inert atmosphere of nitrogen or argon, using a double

vacuum manifold with the inert gas passing through a bed of activated 4 Å molecular sieves and self-indicating silica gel. Cs<sub>2</sub>CO<sub>3</sub>, K<sub>2</sub>CO<sub>3</sub> and activated MnO<sub>2</sub> were dried in an oven prior to use. PhMgBr (in THF) was titrated against salicaldehyde phenylhydrazone prior to use, according to the procedure of Love and Jones.<sup>9</sup>

**Reactions with microwave irradiation** were carried out in a Biotage Initiator microwave synthesizer.

*In vacuo* refers to the use of a rotary evaporator attached to a diaphragm pump. Brine refers to a saturated aqueous solution of sodium chloride. Petroleum ether refers to the fraction boiling between 30–40 °C unless otherwise stated.

**Stability of 8 in buffer:** 0.5 mg of (+)-**8** in 10 µL DMSO was suspended in buffer (50 mM HEPES, 0.01% TWEEN, 0.1% BSA). After 2 h, the suspension was lyophilised then extracted with EtOH. A sample of buffer without DMSO or compound was similarly lyophilised and extracted. Analytical chiral HPLC was carried out as described above, indicating >98% ee and 95% purity.

**Cytotoxicity of 8 in HeLa and U2OS cells:** HeLa cells were grown and maintained in DMEM supplemented with L-glutamine and 10% fetal calf serum; U2OS cells were grown and maintained in McCoy's medium supplemented with 10% fetal calf serum. Cells were seeded in a 96-well plate at a density of  $5 \times 10^3$  cells per well in 100 µL of media. After 24 h, cells were inoculated with DMSO (negative control), staurosporine (positive control) or **8**. After 24 h or 72 h, 10 µL of WST-1 (Roche Diagnostics) was added to the culture medium and cell viability was determined by colorimetric WST-1 conversion assay. Formazan dye formation was measured at 450 nm using a Molecular devices Spectramax Plus<sup>384</sup> microplate reader. Relative WST-1 conversion in treated cells compared with untreated control cells was calculated after

subtraction of a WST-1 conversion in the absence of cells. Dose response graphs of staurosporine or **8** treatment were analyzed using the GraphPad Prism 5 program (GraphPad Software, Inc.).

**Cytotoxicity of 8, 9 and 15 in MV4;11 cells:** MV4;11 cells were grown and maintained in RPMI-1640 medium with L-glutamine supplemented with 10% fetal calf serum and 1% (v/v) penicillin/streptomycin antibiotics. MV4;11 cells were seeded in a 96-well plate at a density of  $1 \times 10^4$  cells per well in 100  $\mu$ L of media. Cells were treated with **8, 9, 15**, DMSO (negative control), (+)-JQ1 or SGI-1776 (SuperGen) (positive controls) in 100  $\mu$ L of media. After 72 h at 37 °C, 25  $\mu$ L of 3-(4,5-dimethylthiazol-2-yl)-5-(3-carboxymethoxyphenyl)-2-(4-sulfophenyl)-2H-tetrazolium (MTS) coupled with phenazine methosulfate was added to each well, according to the manufacturers' instructions. Plates were incubated for 2 h at 37 °C, 5% CO<sub>2</sub> and the absorbance read at 490 nm. Positive and negative controls behaved as expected (IC<sub>50</sub> SGI-1176: 53 nM, (+)-JQ1: 242 nM).

**Clonogenic survival assay:** H1975 or A549 cells were plated in a 6-well plate at a density of 300 cells/well, and allowed to adhere for 5 h before treatment. The cells were treated with either **8, 9** or DMSO (as a control). Colonies (of at least 50 cells) were allowed to form for 10-14 days. The media was removed, and colonies were stained with crystal violet and counted.

**Surface plasmon resonance methods and analysis of compound binding to BRD4(1):** Duplicate SPR data for compound binding to immobilized BRD4(1) was generated on a Biacore T200 instrument at 25 °C. In all cases, a series S NTA chip was used to immobilize N-His tagged BRD4(1) via Ni<sup>2+</sup> capture of the affinity tag followed by amine coupling at neutral pH 7.4. Flow cells of a NTA chip were primed using 350 mM EDTA injected for 60 seconds at 20  $\mu$ L/min and then 500  $\mu$ M Ni<sup>2+</sup> for 120 seconds at 15  $\mu$ L/min, this was repeated twice. The

surface was activated with 0.2 M *N*-ethyl-*N'*-(diethylaminopropyl)-carbodiimide (EDC) and 0.05 M *N*-hydroxysuccinimide (NHS). Typically 6.25  $\mu\text{g}/\text{mL}$  of BRD4(1) protected with I-BET at pH 7.4 in 50 mM HEPES pH7.4, 150 mM NaCl was injected at 5  $\mu\text{L}/\text{min}$  for 45 seconds resulting in 1.2K RU – 4K RU of protein immobilized on the surface. The surface was neutralized with ethanolamine and extensively washed in the running buffer 50 mM HEPES pH7.4, 150 mM NaCl. A control surface of carbonic anhydrase was immobilized using the same methodology with a 600 s injection time at 5  $\mu\text{L}/\text{min}$  resulting in >5K RU protein immobilized on the surface. Binding of test compounds was determined in 50 mM HEPES pH7.4, 150 mM NaCl, 0.05% Tween and 1% Ethanol.

Sensorgrams and binding curves were analyzed with BIAevaluation (GE Healthcare) software using a 1: 1 binding model. All compounds tested were selective for binding to BRD4(1) over carbonic anhydrase.

Good agreement was observed in the  $K_D$  values derived from kinetic and equilibrium analysis (within 2- fold). The kinetic parameters  $K_a$  and  $K_d$  could not be accurately determined in this experiment due to the rapid rates of association and dissociation observed under these conditions. Reported data were generated using steady state analysis with a 1:1 binding model.

## **Synthesis and Characterization of 10, 11, 18-20**

### **3-(3,5-Dimethylisoxazol-4-yl)-5-hydroxybenzaldehyde 10**

To a solution of 3-bromo-5-hydroxybenzoic acid (434 mg, 2.00 mmol) in MeOH (6 mL) was added conc.  $\text{H}_2\text{SO}_4$  (5 mL), and the mixture was heated under reflux for 5 h. After cooling to rt,  $\text{H}_2\text{O}$  (20 mL) was added, and the resultant precipitate was filtered and washed with cold  $\text{H}_2\text{O}$ .

The solid was dried by azeotropic distillation with toluene, giving methyl 3-bromo-5-hydroxybenzoate as a colorless solid (354 mg, 77%).

To a suspension of  $\text{LiAlH}_4$  (144 mg, 3.79 mmol, 2.5 eq) in dry THF (7 mL) was added methyl 3-bromo-5-hydroxybenzoate (354 mg, 1.53 mmol, 1.0 eq), and the mixture was heated under reflux for 5 h. After cooling to rt, the mixture was poured onto ice, then acidified with HCl (aq. 10%) and extracted with EtOAc. The organic layers were dried ( $\text{Na}_2\text{SO}_4$ ), filtered and concentrated *in vacuo* to give 3-bromo-5-hydroxybenzyl alcohol as a colorless solid (255 mg, 84%).

To a suspension of freshly-prepared pyridinium chlorochromate (515 mg, 2.39 mmol, 1.5 eq) in  $\text{CH}_2\text{Cl}_2$  was added 3-bromo-5-hydroxybenzyl alcohol (322 mg, 1.59 mmol, 1.0 eq) in  $\text{CH}_2\text{Cl}_2$  (10 mL) slowly at 0 °C. The mixture was stirred at rt for 3.5 h, then concentrated *in vacuo*. The residue was washed with  $\text{Et}_2\text{O}$  (4 × 10 mL), then filtered. The filtrate was washed with  $\text{NaHCO}_3$  (sat. aq. 30 mL) and the aqueous later was extracted with EtOAc (3 × 50 mL). The combined organic layers were dried ( $\text{Na}_2\text{SO}_4$ ), filtered and concentrated *in vacuo* to give 3-bromo-5-hydroxybenzaldehyde as a colorless solid (192 mg, 60%); mp 137-140 °C;  $^1\text{H}$  NMR ( $\text{DMSO}-d_6$ ) 7.27-7.26 (2H, m); 7.52 (1H, m), 9.88 (1H, s);  $m/z$  ( $\text{ES}^+$ ) 201 ( $[\text{M}+ \text{H}]^+$ ), 203 ( $[\text{M}+ \text{H}]^+$ ).

Following the procedure of Molander *et al.*,<sup>10</sup> to a round-bottomed flask containing 3-bromo-5-hydroxybenzaldehyde (5.0 g, 25.0 mmol, 1.0 eq), potassium 3,5-dimethylisoxazol-4-yl trifluoroborate (5.6 g, 27.5 mmol, 1.1 eq),  $\text{Pd}(\text{OAc})_2$  (340 mg, 1.5 mmol, 0.06 eq), RuPhos (1.4 g, 3.0 mmol, 0.12 eq) and  $\text{Na}_2\text{CO}_3$  (5.3 g, 50 mmol, 2.0 eq) under  $\text{N}_2$  was added degassed EtOH (70 mL), and the mixture heated under reflux for 2 h. The mixture was cooled to rt and filtered through a plug of silica gel (eluent 25% MeOH/EtOAc). The filtrate was concentrated *in vacuo*, and the residue was dissolved in THF (15 mL) at 70 °C then filtered. The filtrate was

concentrated *in vacuo* to a volume of approximately 4 mL and then cooled. Filtration gave **10** as a colorless solid (3.55 g). The filtrate was concentrated *in vacuo* and the residue purified by silica gel column chromatography (gradient elution, 9 → 33% EtOAc/petroleum ether) to give **10** as a colorless solid (0.42 g, combined yield 73%); mp 184-187 °C; <sup>1</sup>H NMR (500 MHz, DMSO-D<sub>6</sub>) 2.24 (3H, s), 2.42 (3H, s), 7.09 (1H, dd, *J* = 2.4, 1.6 Hz), 7.26 (1H, dd, *J* = 2.4, 1.3 Hz), 7.36 (1H, dd, *J* = 1.6, 1.3 Hz), 9.96 (1H, s); <sup>13</sup>C NMR (126 MHz, DMSO-D<sub>6</sub>) 10.5, 11.4, 113.6, 115.1, 121.6, 121.9, 132.1, 138.1, 158.0, 158.5, 165.5, 193.0; HRMS *m/z* (ES<sup>+</sup>) found [M-H]<sup>-</sup> 216.0671; C<sub>12</sub>H<sub>10</sub>NO<sub>3</sub> requires M<sup>-</sup> 216.0666; *m/z* (ES<sup>-</sup>) 216 ([M-H]<sup>-</sup>, 100), 433 ([2M-H]<sup>-</sup>, 10). Anal. Calcd for C<sub>12</sub>H<sub>11</sub>NO<sub>3</sub>: C, 66.4; H, 5.1; N, 6.5. Found: C, 66.4; H, 4.9; N, 6.5.

### 3-(3,5-Dimethylisoxazol-4-yl)-5-ethoxybenzaldehyde **11**

Following the procedure of Sarju *et al.*,<sup>11</sup> anhydrous K<sub>2</sub>CO<sub>3</sub> (1.91 g, 13.8 mmol, 1.0 eq) and **10** (3.00 g, 13.8 mmol, 1.0 eq) were added to a dry 10-20 mL microwave vial. The vial was sealed and purged with nitrogen (3 × evacuate/fill). EtBr (3.00 g, 2.06 mL, 27.6 mmol) and anhydrous MeOH (15 mL) were added, and the mixture was stirred at 120 °C for 30 min with microwave irradiation, then concentrated *in vacuo*. The residues were extracted with EtOAc (5 × 50 mL), and the combined organic extracts washed with H<sub>2</sub>O (2 × 250 mL) and brine (250 mL), dried (MgSO<sub>4</sub>), filtered and concentrated *in vacuo*. Purification by silica gel column chromatography (gradient elution, 20 → 40% Et<sub>2</sub>O/petroleum ether) gave **11** as a colorless solid (2.32 g, 69 %); mp 99-100 °C (EtOAc); <sup>1</sup>H NMR (500 MHz, CDCl<sub>3</sub>) 1.48 (3H, q, *J* = 7.0 Hz), 2.30 (3H, s), 2.44 (3H, s), 7.05 (1H, dd, *J* = 2.5, 1.5 Hz), 7.33 (1H, dd, *J* = 1.5, 1.3 Hz), 7.38 (1H, dd, *J* = 2.5, 1.3 Hz), 10.01 (1H, s); <sup>13</sup>C NMR (126 MHz, CDCl<sub>3</sub>) 10.8, 11.6, 14.7, 64.0, 111.9, 115.5, 122.4, 123.5, 132.8, 138.2, 158.4, 159.8, 165.7, 191.7; HMRS *m/z* (ES<sup>+</sup>) found [M+Na]<sup>+</sup> 268.0940; C<sub>14</sub>H<sub>15</sub>NNaO<sub>3</sub> M<sup>+</sup> requires 268.0944; *m/z* (ES<sup>+</sup>) 246 ([M+H]<sup>+</sup>, 4), 268 ([M+Na]<sup>+</sup>, 10), 300



([M+MeOH+Na]<sup>+</sup>, 40), 513 ([2M+Na]<sup>+</sup>, 9), 577 ([2M+2MeOH+Na]<sup>+</sup>, 100). Anal. Calcd for C<sub>14</sub>H<sub>15</sub>NO<sub>3</sub>: C, 68.6; H, 6.2; N, 5.7. Found: C, 68.6; H, 6.2; N, 5.6.

### 3-(3,5-Dimethylisoxazol-4-yl)-5-methoxybenzaldehyde **18**

Following the procedure of Parrish *et al.*,<sup>12</sup> anhydrous Cs<sub>2</sub>CO<sub>3</sub> (225 mg, 690 μmol, 1.5 eq) was added to a dry 2-5 mL microwave vial containing **10** (100 mg, 460 μmol, 1.0 eq) and anhydrous DMF (2.3 mL) under a nitrogen atmosphere. The vial was sealed and MeI (131 mg, 57 μL, 920 μmol, 2.0 eq) was added. The suspension was stirred at rt for 2.5 h, then quenched with aq. HCl (1 M, 10 mL). The resultant precipitate was collected by filtration, washed with H<sub>2</sub>O (20 mL) and dried under vacuum to give **18** as a brown solid (68 mg). The filtrate was extracted with EtOAc (3 × 20 mL), and the combined organic layers were washed with H<sub>2</sub>O (2 × 50 mL), brine (50 mL), dried (MgSO<sub>4</sub>), filtered and concentrated *in vacuo* to give **18** as a yellow solid (30 mg, combined yield 92%); mp 90-92 °C (CHCl<sub>3</sub>); <sup>1</sup>H NMR (500 MHz, CDCl<sub>3</sub>) 2.30 (3H, s), 2.44 (3H, s), 3.92 (3H, s), 7.06 (1H, dd, *J* = 2.3, 1.4 Hz), 7.35 (1H, dd, *J* = 1.4, 1.1 Hz), 7.40 (1H, dd, *J* = 2.3, 1.1 Hz), 10.02 (1H, s); <sup>13</sup>C (126 MHz, CDCl<sub>3</sub>) 10.8, 11.6, 55.7, 111.2, 115.5, 122.1, 123.8, 132.8, 138.2, 158.4, 160.5, 165.8, 191.6; HRMS *m/z* (ES<sup>+</sup>) found [M+Na]<sup>+</sup> 254.0789; C<sub>13</sub>H<sub>13</sub>NNaO<sub>3</sub>, M<sup>+</sup> requires 254.0788; *m/z* (ES<sup>+</sup>) 232 ([M+H]<sup>+</sup>, 14), 254 ([M+Na]<sup>+</sup>, 15), 286 ([M+Na+MeOH]<sup>+</sup>, 83), 318 ([M+Na+2MeOH]<sup>+</sup>, 33), 517 ([2M+Na+MeOH]<sup>+</sup>, 9), 549 ([2M+Na+2MeOH]<sup>+</sup>, 100). Anal. Calcd for C<sub>13</sub>H<sub>13</sub>NO<sub>3</sub>: C, 67.5; H, 5.7; N, 6.1. Found: C, 67.4; H, 5.6; N, 6.0.

### 3-(3,5-Dimethylisoxazol-4-yl)-5-(2-methoxyethoxy)benzaldehyde **19**

Following the procedure of Sarju *et al.*,<sup>11</sup> **10** (250 mg, 1.15 mmol, 1.0 eq) and anhydrous K<sub>2</sub>CO<sub>3</sub> (159 mg, 1.15 mmol, 1.0 eq) were added to a dry 2–5 mL microwave vial. The vial was sealed, and MeOH (0.5 mL) and 2-bromoethyl methyl ether (192 mg, 130 μL, 1.38 mmol, 1.2

eq) were added under a nitrogen atmosphere. The mixture was stirred at 110 °C for 30 min with microwave irradiation, then concentrated *in vacuo*. The residues were extracted with EtOAc (40 mL), and the organic extracts were washed with H<sub>2</sub>O (2 × 40 mL), aq. HCl (1 M, 40 mL) and brine (40 mL), dried (MgSO<sub>4</sub>), filtered and concentrated *in vacuo*. Purification by silica gel column chromatography (gradient elution, 15 → 60% EtOAc/petroleum ether) gave **19** as pale yellow oil (221 mg, 70%); <sup>1</sup>H NMR (500 MHz, CDCl<sub>3</sub>) 2.29 (3H, s), 2.43 (3H, s), 3.47 (3H, s), 3.80 (2H, d, *J* = 4.5 Hz), 4.23 (2H, d, *J* = 4.5 Hz), 7.12 (1H, dd, *J* = 2.5, 1.5 Hz), 7.35 (1H, dd, *J* = 1.5, 1.3 Hz), 7.41 (1H, dd, *J* = 2.5, 1.3 Hz), 10.00 (1H, s); <sup>13</sup>C NMR (126 MHz, CDCl<sub>3</sub>) 10.8, 11.6, 59.3, 67.8, 70.8, 112.0, 115.5, 122.7, 123.9, 132.8, 138.2, 158.4, 159.7, 165.8, 191.5; HRMS *m/z* (ES<sup>+</sup>) found [M+Na]<sup>+</sup> 298.1055; C<sub>15</sub>H<sub>17</sub>NNaO<sub>4</sub> requires M<sup>+</sup> 298.1050; *m/z* (ES<sup>+</sup>) 298 ([M+Na]<sup>+</sup>, 11), 330 ([M+Na+MeOH]<sup>+</sup>, 70), 573 ([2M+Na]<sup>+</sup>, 14), 605 ([2M+Na+MeOH]<sup>+</sup>, 32), 637 ([2M+Na+2MeOH]<sup>+</sup>, 100). Anal. Calcd for C<sub>15</sub>H<sub>19</sub>NO<sub>4</sub>: C, 65.4; H, 6.2; N, 5.1. Found: C, 65.5; H, 6.1; N, 5.0.

### 3-(3,5-Dimethylisoxazol-4-yl)-5-(2-hydroxyethoxy)benzaldehyde **20**

To a dry 10–20 mL microwave vial under a nitrogen atmosphere were added **10** (200 mg, 921 μmol, 1.0 eq) and anhydrous DMF (5 mL). Anhydrous Cs<sub>2</sub>CO<sub>3</sub> (450 mg, 1.38 mmol, 1.5 eq) was then added and the vial was sealed. 2-Bromoethyl acetate (230 mg, 150 μL, 1.38 mmol, 1.5 eq) was added by syringe, and the mixture was stirred at 80 °C for 16 h, then concentrated *in vacuo*. The residues were resuspended in MeOH (10 mL) and stirred at rt for 90 min, then concentrated *in vacuo*. HCl (aq. 1 M, 10 mL) was added, and the solution was extracted with EtOAc (3 × 10 mL). The combined organic layers were washed with H<sub>2</sub>O (30 mL) and brine (30 mL), dried (MgSO<sub>4</sub>), filtered and concentrated *in vacuo*. Purification by silica gel column chromatography (gradient elution, 30 → 70% EtOAc/petroleum ether) gave **20** as a colorless

solid (98 mg, 41%); mp 96–98 °C (CHCl<sub>3</sub>); <sup>1</sup>H NMR (500 MHz, CDCl<sub>3</sub>) 2.12 (1H, t, *J* = 3.5 Hz), 2.30 (3H, s), 2.44 (3H, s), 4.04 (2H, td, *J* = 4.5, 3.0 Hz), 4.20 (2H, t, *J* = 4.5 Hz), 7.10 (1H, dd, *J* = 2.5, 1.5 Hz), 7.37 (1H, dd, *J* = 1.5, 1.3 Hz), 7.41 (1H, dd, *J* = 2.5, 1.3 Hz); <sup>13</sup>C NMR (126 MHz, CDCl<sub>3</sub>) 10.8, 11.6, 61.2, 69.7, 111.9, 115.4, 122.4, 124.1, 133.0, 138.2, 158.4, 159.6, 165.8, 191.5; HRMS *m/z* (ES<sup>+</sup>) found [M+Na]<sup>+</sup> 284.0893; C<sub>14</sub>H<sub>15</sub>NNaO<sub>4</sub> requires M<sup>+</sup> 284.0893; *m/z* (ES<sup>+</sup>) 284 ([M+Na]<sup>+</sup>, 7), 316 ([M+Na+MeOH]<sup>+</sup>, 56), 545 ([2M+Na]<sup>+</sup>, 9), 577 ([2M+Na+MeOH]<sup>+</sup>, 11), 609 ([2M+Na+2MeOH]<sup>+</sup>, 100), 902 ([3M+Na+3MeOH]<sup>+</sup>, 18). Anal. Calcd for C<sub>14</sub>H<sub>15</sub>NO<sub>4</sub>: C, 64.4; H, 5.8; N, 5.4. Found: C, 64.5; H, 5.7; N, 5.2.

### Further Characterization for Compounds 8, 9, 12-17, 21-23

#### (3-(3,5-Dimethylisoxazol-4-yl)-5-ethoxyphenyl)(phenyl)methanol 12

<sup>13</sup>C NMR (126 MHz, CDCl<sub>3</sub>) 10.8, 11.6, 14.8, 63.6, 76.1, 111.4, 114.4, 116.5, 119.5, 126.5, 127.8, 128.6, 131.7, 143.5, 145.9, 158.6, 159.3, 165.2; Anal. Calcd for C<sub>20</sub>H<sub>21</sub>NO<sub>3</sub>: C, 74.3; H, 6.6; N, 4.3. Found: C, 74.2; H, 6.7; N, 4.4.

#### (3-(3,5-Dimethylisoxazol-4-yl)-5-ethoxyphenyl)(4-fluorophenyl)methanol 13

<sup>13</sup>C NMR (126 MHz, CDCl<sub>3</sub>) 10.7, 11.5, 14.7, 63.6, 75.2, 111.4, 114.4, 115.3 (d, *J* = 21 Hz), 116.5, 119.4, 128.2 (d, *J* = 8.1 Hz), 131.7, 139.5 (d, *J* = 3.5 Hz), 145.9, 158.6, 159.3, 162.2 (d, *J* = 246 Hz), 165.3; <sup>19</sup>F NMR (470 MHz, CDCl<sub>3</sub>) –114.7; Anal. Calcd for C<sub>20</sub>H<sub>20</sub>FNO<sub>3</sub>: C, 70.4; H, 5.9; N, 4.1. Found: C, 70.2; H, 6.0; N, 4.0.

#### (3-(3,5-Dimethylisoxazol-4-yl)-5-ethoxyphenyl)(3-fluorophenyl)methanol 14

<sup>13</sup>C NMR (126 MHz, CDCl<sub>3</sub>) 10.7, 11.6, 14.7, 63.6, 75.3, 111.5, 113.3 (d, *J* = 23 Hz), 114.4, 114.6, 116.4, 119.4, 122.0 (d, *J* = 2.8 Hz), 130.0 (d, *J* = 8.1 Hz), 131.8, 145.5, 146.2 (d, *J* =

6.8 Hz), 158.6, 159.4, 162.9 (d,  $J = 246$  Hz), 165.3;  $^{19}\text{F}$  NMR (470 MHz,  $\text{CDCl}_3$ )  $-112.5$ ; Anal. Calcd for  $\text{C}_{20}\text{H}_{20}\text{FNO}_3$ : C, 70.4; H, 5.9; N, 4.1. Found: C, 70.2; H, 5.8; N, 4.1.

(4-Chlorophenyl)(3-(3,5-dimethylisoxazol-4-yl)-5-ethoxyphenyl)methanol **15**

$^{13}\text{C}$  NMR (126 MHz,  $\text{CDCl}_3$ ) 10.9, 11.7, 14.8, 63.7, 75.4, 111.5, 114.6, 116.5, 119.4, 127.9, 128.7, 131.9, 133.5, 142.1, 145.7, 158.6, 159.5, 165.3; Anal. Calcd for  $\text{C}_{20}\text{H}_{20}\text{ClNO}_3$ : C, 67.1; H, 5.6; N, 3.9. Found: C, 67.1; H, 5.5; N, 3.8.

(3-Chlorophenyl)(3-(3,5-dimethylisoxazol-4-yl)-5-ethoxyphenyl)methanol **16**

$^{13}\text{C}$  NMR (126 MHz,  $\text{CDCl}_3$ ) 10.8, 11.6, 14.8, 63.7, 75.2, 111.6, 114.6, 116.5, 119.5, 124.7, 126.7, 127.8, 129.8, 131.9, 134.5, 145.5, 145.8, 158.6, 159.5, 165.4; Anal. Calcd for  $\text{C}_{20}\text{H}_{20}\text{ClNO}_3$ : C, 67.1; H, 5.6; N, 3.9. Found: C, 67.2; H, 5.6; N, 3.9.

3-(3,5-Dimethylisoxazol-4-yl)-5-(hydroxy(phenyl)methyl)phenol **8**

$^{13}\text{C}$  NMR (126 MHz, acetone- $\text{D}_6$ ) 10.9, 11.6, 75.9, 113.5, 115.2, 117.2, 119.3, 127.3, 127.8, 129.0, 132.3, 146.3, 148.8, 158.5, 158.9, 165.8; Anal. Calcd for  $\text{C}_{18}\text{H}_{17}\text{NO}_3$ : C, 73.2; H, 5.8; N, 4.7. Found: C, 73.1; H, 5.8; N, 4.8.

3-(3,5-Dimethylisoxazol-4-yl)-5-(hydroxy(phenyl)methyl)phenyl acetate **9**

$^{13}\text{C}$  NMR (126 MHz,  $\text{CDCl}_3$ ) 10.7, 11.6, 21.3, 75.5, 115.8, 118.7, 121.1, 124.4, 126.6, 128.0, 128.7, 131.7, 143.2, 146.1, 150.9, 158.4, 165.6, 169.3; Anal. Calcd for  $\text{C}_{20}\text{H}_{19}\text{NO}_4$ : C, 71.2; H, 5.7; N, 4.2. Found: C, 71.1; H, 5.6; N, 4.1.

(3-(3,5-Dimethylisoxazol-4-yl)-5-hydroxyphenyl)(phenyl)methanone **17**

$^{13}\text{C}$  NMR (126 MHz,  $\text{D}_6$ -acetone) 10.9, 11.6, 116.2, 116.5, 120.6, 122.6, 129.3, 130.6, 133.0, 133.4, 138.5, 140.5, 158.7, 158.9, 166.3, 196.1.

(3-(3,5-Dimethylisoxazol-4-yl)-5-methoxyphenyl)(phenyl)methanol 21

<sup>13</sup>C NMR (126 MHz, CDCl<sub>3</sub>) 10.7, 11.6, 55.3, 75.9, 110.8, 114.0, 116.5, 119.7, 126.5, 127.8, 128.6, 131.7, 143.6, 146.0, 158.6, 159.9, 165.3; Anal. Calcd for C<sub>19</sub>H<sub>19</sub>NO<sub>3</sub>: C, 73.8; H, 6.2; N, 4.5. Found: C, 74.0; H, 6.0; N, 4.4.

(3-(3,5-Dimethylisoxazol-4-yl)-5-(2-methoxyethoxy)phenyl)(phenyl)methanol 22

<sup>13</sup>C NMR (126 MHz, CDCl<sub>3</sub>) 10.8, 11.6, 59.2, 67.3, 71.0, 75.9, 111.6, 114.5, 116.5, 119.9, 126.5, 127.8, 128.5, 131.6, 143.6, 146.0, 158.6, 159.2, 165.3; Anal. Calcd for C<sub>21</sub>H<sub>23</sub>NO<sub>4</sub>: C, 71.4; H, 6.6; N, 4.0. Found: C, 71.5; H, 6.3; N, 3.8.

2-(3-(3,5-Dimethylisoxazol-4-yl)-5-(hydroxy(phenyl)methyl)phenoxy)ethanol 23

<sup>13</sup>C NMR (126 MHz, DMSO-D<sub>6</sub>) 10.5, 11.3, 59.5, 69.6, 73.9, 111.5, 112.9, 115.9, 119.0, 126.1, 126.8, 128.1, 130.7, 145.5, 148.0, 158.0, 158.9, 165.1; Anal. Calcd for C<sub>20</sub>H<sub>21</sub>NO<sub>4</sub>: C, 70.8; H, 6.2; N, 4.1. Found: C, 70.7; H, 6.4; N, 4.1.

## References

- (1) Filippakopoulos, P.; Qi, J.; Picaud, S.; Shen, Y.; Smith, W. B.; Fedorov, O.; Morse, E. M.; Keates, T.; Hickman, T. T.; Felletar, I.; Philpott, M.; Munro, S.; McKeown, M. R.; Wang, Y.; Christie, A. L.; West, N.; Cameron, M. J.; Schwartz, B.; Heightman, T. D.; La Thangue, N.; French, C. A.; Wiest, O.; Kung, A. L.; Knapp, S.; Bradner, J. E. Selective inhibition of BET bromodomains. *Nature*. **2010**, *468*, 1067–1073.
- (2) Kabsch, W. Automatic indexing of rotation diffraction patterns. *J. Appl. Cryst.* **1988**, *21*, 67–71.
- (3) Kabsch, W. Evaluation of Single-Crystal X-ray Diffraction Data from a Position-Sensitive Detector. *J. Appl. Cryst.* **1988**, *21*, 916–924.
- (4) Evans, P. SCALA - scale together multiple observations of reflections, 3.3.0. *MRC Laboratory of Molecular Biology, Cambridge*. **2007**.
- (5) McCoy, A. J.; Grosse-Kunstleve, R. W.; Storoni, L. C.; Read, R. J. Likelihood-enhanced fast translation functions. *Acta Crystallogr. D Biol. Crystallogr.* **2005**, *61*, 458–464.
- (6) Perrakis, A.; Morris, R.; Lamzin, V. S. Automated protein model building combined with iterative structure refinement. *Nat. Struct. Biol.* **1999**, *6*, 458–463.

- (7) Emsley, P.; Cowtan, K. Coot: model-building tools for molecular graphics. *Acta Crystallogr. D Biol. Crystallogr.* **2004**, *60*, 2126–2132.
- (8) Painter, J.; Merritt, E. A. Optimal description of a protein structure in terms of multiple groups undergoing TLS motion. *Acta Crystallogr. D Biol. Crystallogr.* **2006**, *62*, 439–450.
- (9) Love, B. E.; Jones, E. G. The Use of Salicylaldehyde Phenylhydrazone as an Indicator for the Titration of Organometallic Reagents. *J. Org. Chem.* **1999**, *64*, 3755–3756.
- (10) Molander, G. A.; Canturk, B.; Kennedy, L. E. Scope of the Suzuki-Miyaura cross-coupling reactions of potassium heteroaryltrifluoroborates. *J. Org. Chem.* **2009**, *74*, 973–980.
- (11) Sarju, J.; Danks, T. N.; Wagner, G. Rapid microwave-assisted synthesis of phenyl ethers under mildly basic and nonaqueous conditions. *Tetrahedron Lett.* **2004**, *45*, 7675–7677.
- (12) Parrish, J. P.; Sudaresan, B.; Jung, K. W. Improved Cs<sub>2</sub>CO<sub>3</sub> promoted O-alkylation of phenols. *Synth. Commun.* **1999**, *29*, 4423–4431.

3-(3,5-Dimethylisoxazol-4-yl)-5-hydroxybenzaldehyde **10** <sup>1</sup>H NMR

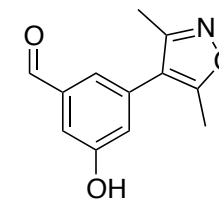

NAME CDS intermediate  
EXPNO 1  
PROCNO 1  
Date\_ 20120706  
Time 1.17  
INSTRUM avc500  
PROBHD 5 mm CPDUL 13C  
PULPROG zg30  
TD 65536  
SOLVENT DMSO  
NS 16  
DS 2  
SWH 10330.578 Hz  
FIDRES 0.157632 Hz  
AQ 3.1719923 sec  
RG 4  
DW 48.400 usec  
DE 6.00 usec  
TE 298.0 K  
D1 1.00000000 sec  
TD0 1

===== CHANNEL f1 =====  
NUC1 1H  
P1 9.60 usec  
PL1 -6.00 dB  
PL1W 15.19999981 W  
SFO1 500.3030896 MHz  
SI 32768  
SF 500.3000000 MHz  
WDW EM  
SSB 0  
LB 0.30 Hz  
GB 0  
PC 1.00

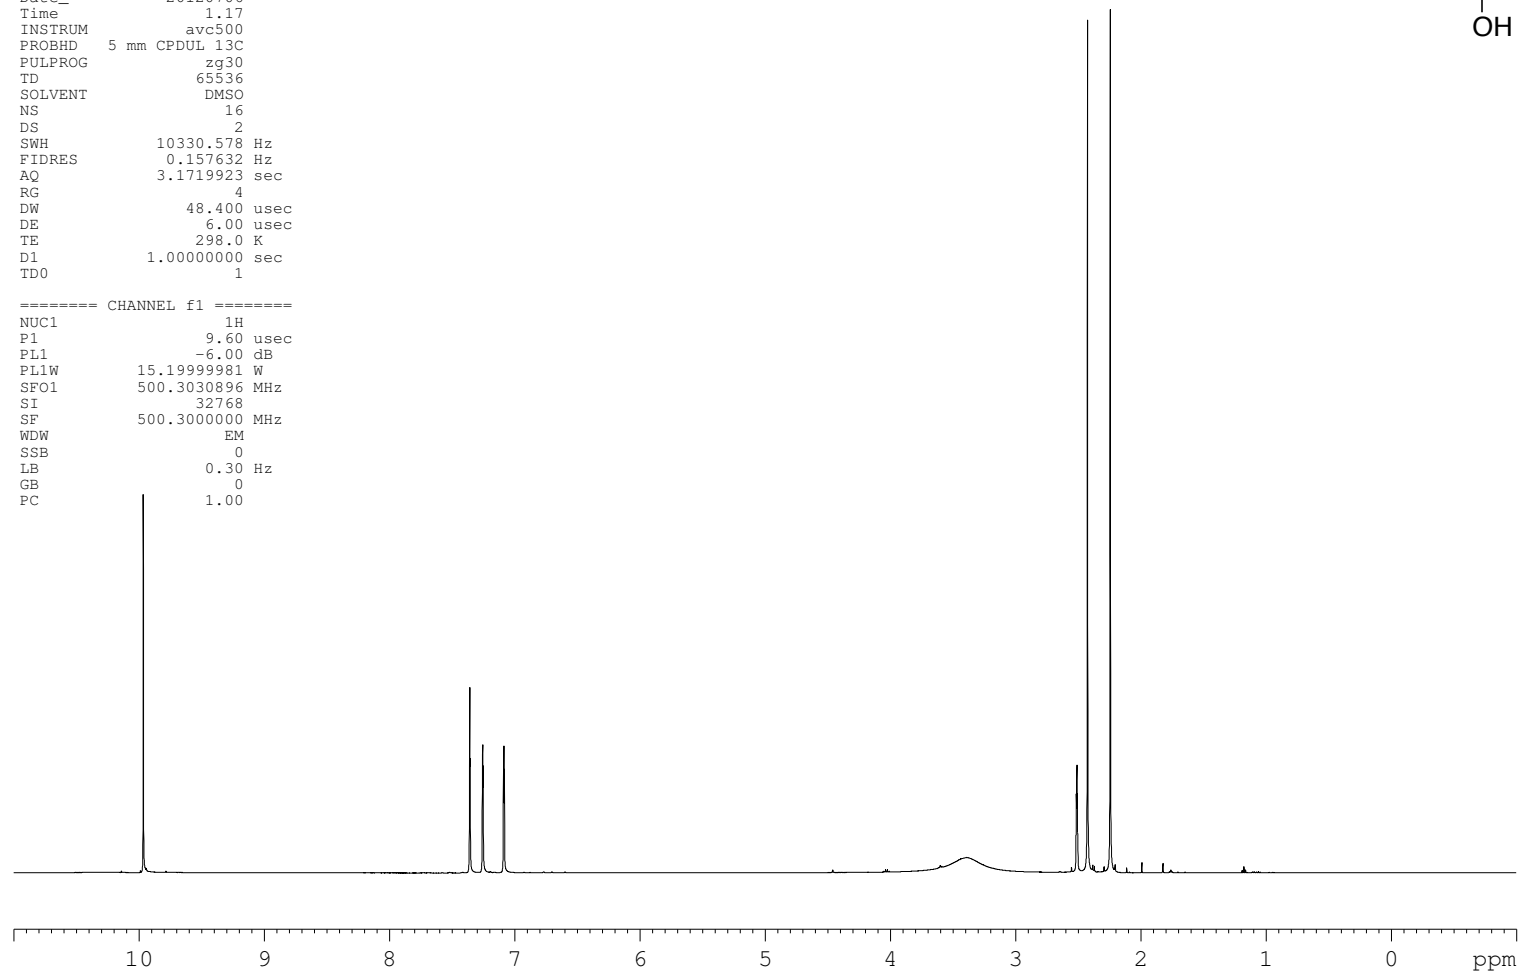

3-(3,5-Dimethylisoxazol-4-yl)-5-hydroxybenzaldehyde **10** <sup>13</sup>C NMR

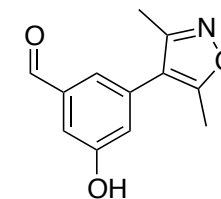

```

NAME      CDS intermediate
EXPNO     4
PROCNO    1
Date_     20120706
Time      2.12
INSTRUM   avc500
PROBHD    5 mm CPDUL 13C
PULPROG   zgpg30
TD         65536
SOLVENT   DMSO
NS         256
DS         2
SWH        31250.000 Hz
FIDRES     0.476837 Hz
AQ         1.0486259 sec
RG         1030
DW         16.000 usec
DE         20.00 usec
TE         298.0 K
D1         2.00000000 sec
D11        0.03000000 sec
TD0        1
    
```

```

===== CHANNEL f1 =====
NUC1       13C
P1         10.00 usec
PL1        -4.40 dB
PL1W       28.15752029 W
SFO1       125.8131151 MHz
    
```

```

===== CHANNEL f2 =====
CPDPRG2    waltz16
NUC2       1H
PCPD2      80.00 usec
PL2        -6.00 dB
PL12       12.42 dB
PL13       18.42 dB
PL2W       15.19999981 W
PL12W      0.21869738 W
PL13W      0.05493430 W
SFO2       500.3020012 MHz
SI         32768
SF         125.8005954 MHz
WDW        EM
SSB        0
LB         1.00 Hz
GB         0
PC         1.40
    
```

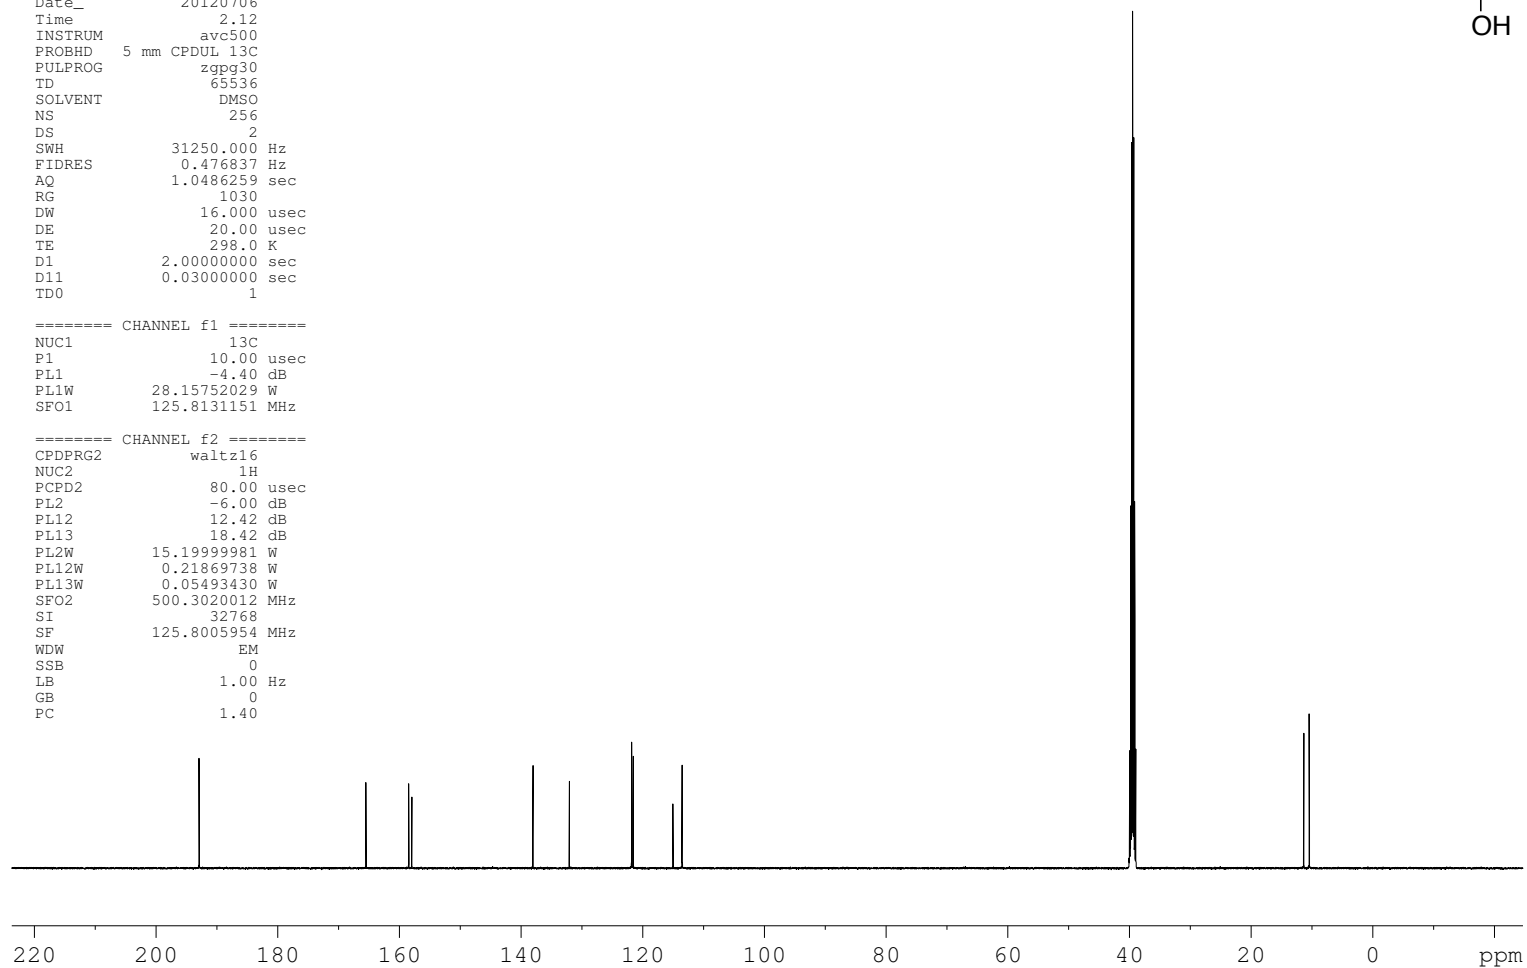



3-(3,5-Dimethylisoxazol-4-yl)-5-ethoxybenzaldehyde **11** <sup>1</sup>H NMR

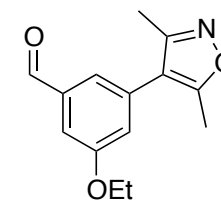

NAME 096  
EXPNO 1  
PROCNO 1  
Date\_ 20110515  
Time\_ 6.16  
INSTRUM ave500  
PROBHD 5 mm CPDUL 13C  
PULPROG zg30  
TD 65536  
SOLVENT CDCl3  
NS 16  
DS 2  
SWH 10330.578 Hz  
FIDRES 0.157632 Hz  
AQ 3.1719923 sec  
RG 4  
DW 48.400 usec  
DE 6.00 usec  
TE 298.0 K  
D1 1.0000000 sec  
TD0 1

===== CHANNEL f1 =====  
NUC1 1H  
P1 9.60 usec  
PL1 -6.00 dB  
PL1W 15.19999981 W  
SFO1 500.3030896 MHz  
SI 32768  
SF 500.3000240 MHz  
WDW EM  
SSB 0  
LB 0.30 Hz  
GB 0  
PC 1.00

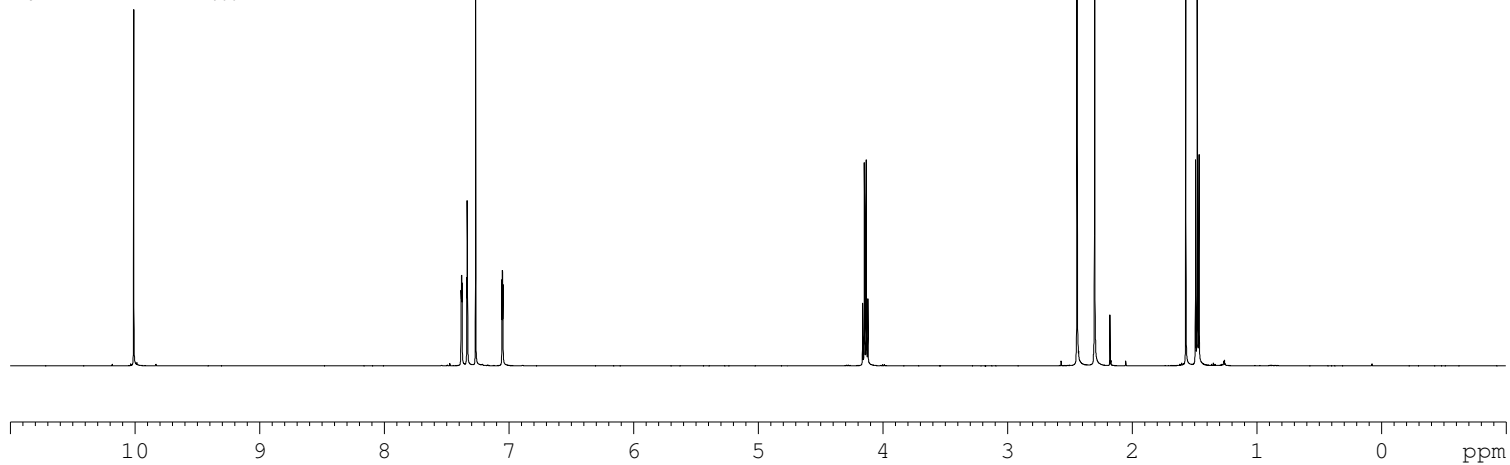

3-(3,5-Dimethylisoxazol-4-yl)-5-ethoxybenzaldehyde **11**  $^{13}\text{C}$  NMR

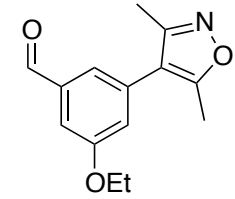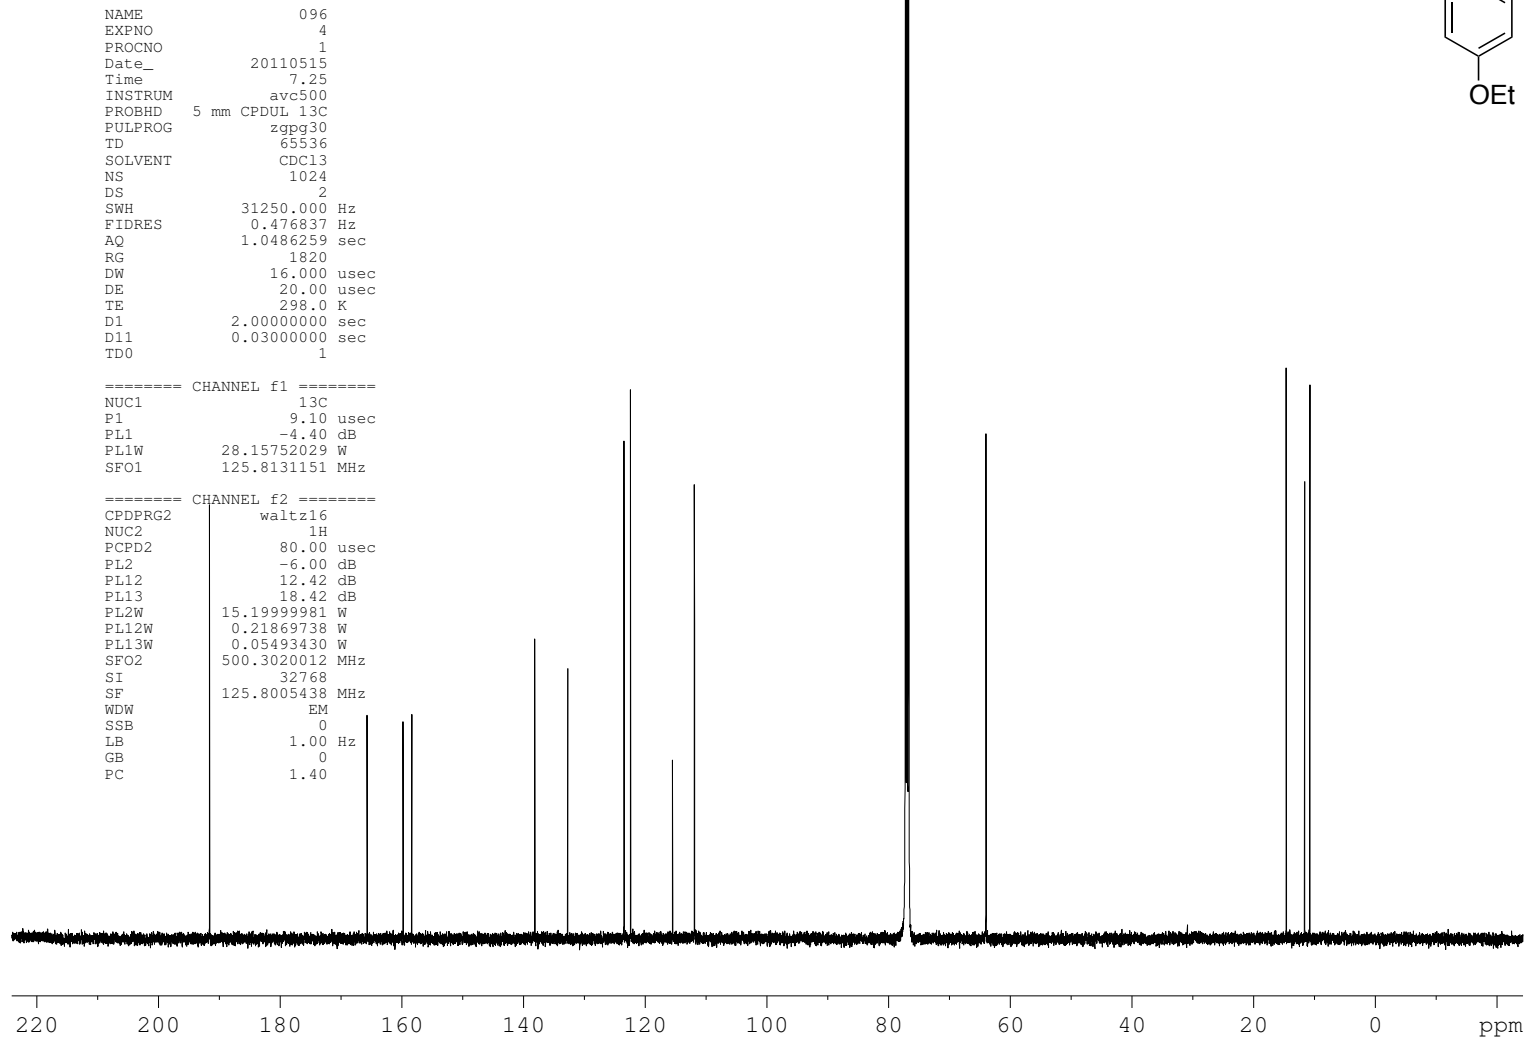

(3-(3,5-Dimethylisoxazol-4-yl)-5-ethoxyphenyl)(phenyl)methanol **12** <sup>1</sup>H NMR

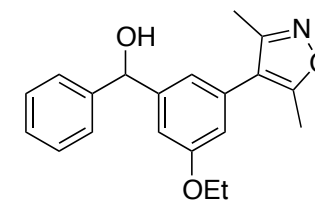

```
NAME          098
EXPNO         1
PROCNO        1
Date_         20110526
Time_         6.18
INSTRUM       ave500
PROBHD        5 mm CPDUL 13C
PULPROG       zg30
TD            65536
SOLVENT       CDCl3
NS            16
DS            2
SWH           10330.578 Hz
FIDRES        0.157632 Hz
AQ            3.1719923 sec
RG            4
DW            48.400 usec
DE            6.00 usec
TE            298.0 K
D1            1.0000000 sec
TD0           1
```

```
===== CHANNEL f1 =====
NUC1          1H
P1            9.60 usec
PL1          -6.00 dB
PL1W         15.19999981 W
SFO1         500.3030896 MHz
SI           32768
SF           500.3000240 MHz
WDW           EM
SSB           0
LB           0.30 Hz
GB           0
PC           1.00
```

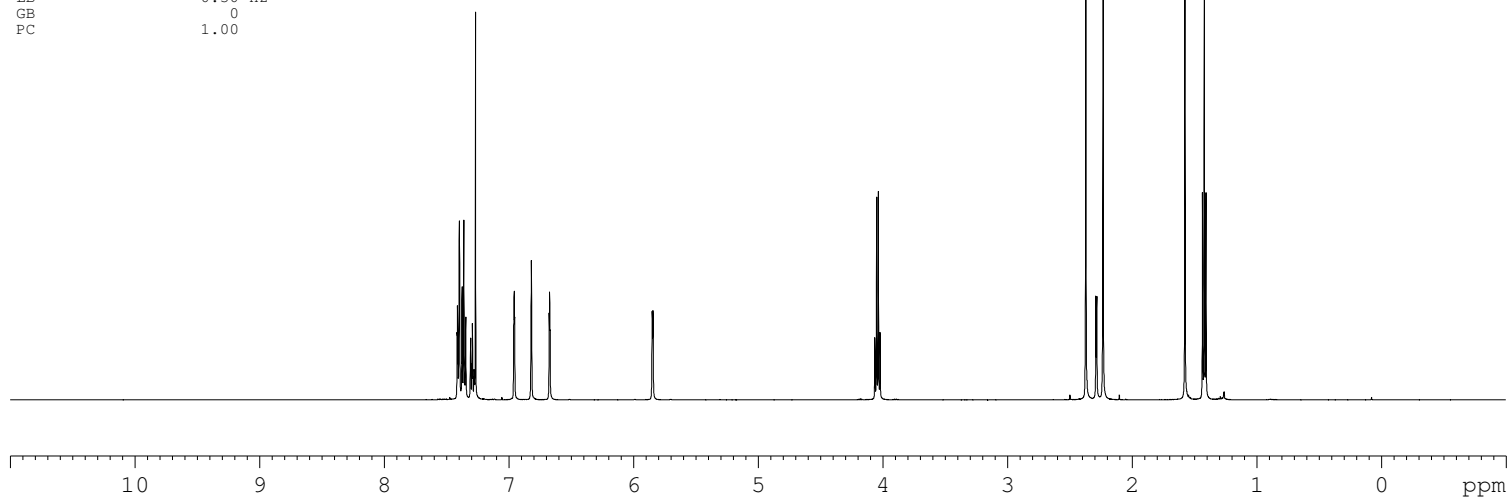

(3-(3,5-Dimethylisoxazol-4-yl)-5-ethoxyphenyl)(phenyl)methanol **12** <sup>13</sup>C NMR

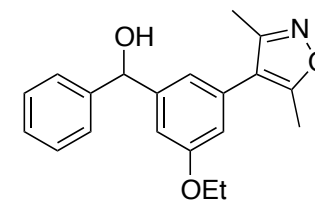

```
NAME          098
EXPNO         4
PROCNO        1
Date_         20110526
Time          7.01
INSTRUM       ave500
PROBHD        5 mm CPDUL 13C
PULPROG       zgpg30
TD            65536
SOLVENT       CDC13
NS            512
DS            2
SWH           31250.000 Hz
FIDRES        0.476837 Hz
AQ            1.0486259 sec
RG            912
DW            16.000 usec
DE            20.00 usec
TE            298.0 K
D1            2.0000000 sec
D11           0.0300000 sec
TD0           1
```

```
===== CHANNEL f1 =====
NUC1          13C
P1            9.10 usec
PL1           -4.40 dB
PL1W          28.15752029 W
SFO1          125.8131151 MHz
```

```
===== CHANNEL f2 =====
CPDPRG2      waltz16
NUC2          1H
PCPD2         80.00 usec
PL2           -6.00 dB
PL12          12.42 dB
PL13          18.42 dB
PL2W          15.19999981 W
PL12W         0.21869738 W
PL13W         0.05493430 W
SFO2          500.3020012 MHz
SI            32768
SF            125.8005438 MHz
WDW           EM
SSB           0
LB            1.00 Hz
GB            0
PC            1.40
```

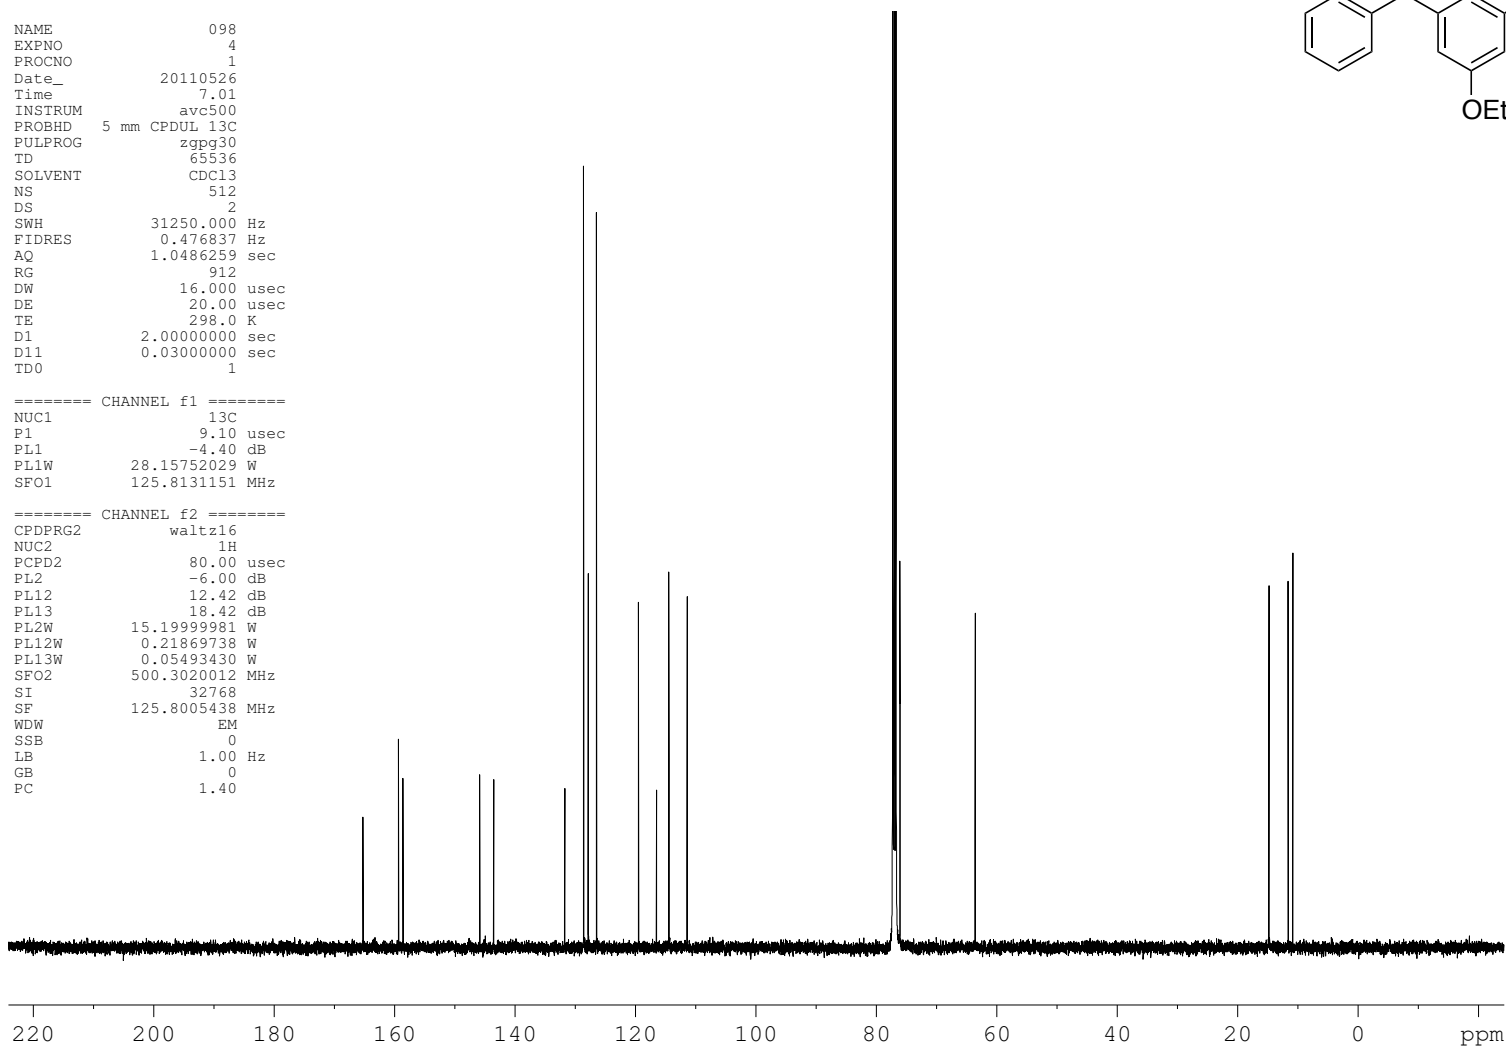

(3-(3,5-Dimethylisoxazol-4-yl)-5-ethoxyphenyl)(3-fluorophenyl)methanol **13** <sup>1</sup>H NMR

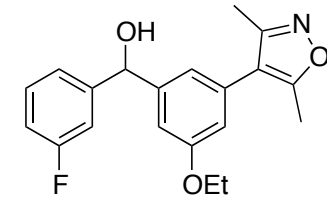

```
NAME          102 H, C
EXPNO         1
PROCNO       1
Date_        20110602
Time         1.29
INSTRUM      ave500
PROBHD       5 mm CPDUL 13C
PULPROG      zg30
TD           65536
SOLVENT      CDCl3
NS           16
DS           2
SWH          10330.578 Hz
FIDRES       0.157632 Hz
AQ           3.1719923 sec
RG           4
DW           48.400 usec
DE           6.00 usec
TE           298.0 K
D1           1.0000000 sec
TD0          1
```

```
===== CHANNEL f1 =====
NUC1          1H
P1            9.60 usec
PL1          -6.00 dB
PL1W         15.19999981 W
SFO1         500.3030896 MHz
SI           32768
SF           500.3000240 MHz
WDW           EM
SSB           0
LB           0.30 Hz
GB           0
PC           1.00
```

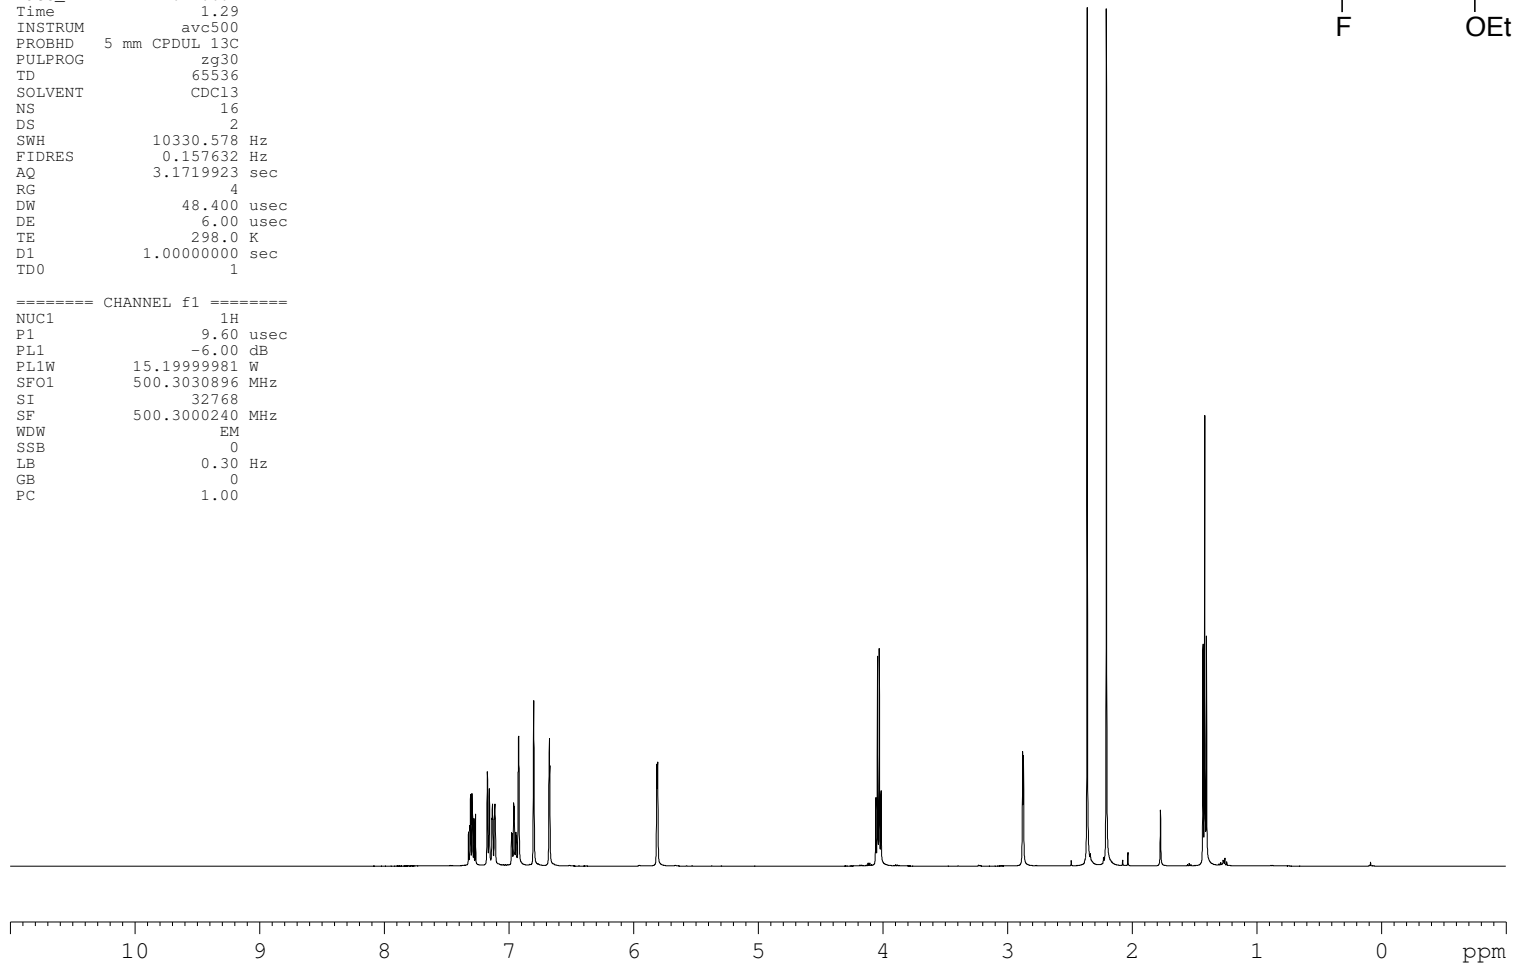

(3-(3,5-Dimethylisoxazol-4-yl)-5-ethoxyphenyl)(3-fluorophenyl)methanol **13** <sup>13</sup>C NMR

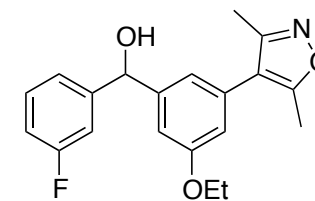

```
NAME          102 H, C
EXPNO         4
PROCNO        1
Date_         20110602
Time          1.59
INSTRUM       avc500
PROBHD        5 mm CPDUL 13C
PULPROG       zgpg30
TD            65536
SOLVENT       CDCl3
NS            256
DS            2
SWH           31250.000 Hz
FIDRES        0.476837 Hz
AQ            1.0486259 sec
RG            1820
DW            16.000 usec
DE            20.00 usec
TE            298.1 K
D1            2.0000000 sec
D11           0.0300000 sec
TD0           1
```

```
===== CHANNEL f1 =====
NUC1           13C
P1             9.10 usec
PL1            -4.40 dB
PL1W           28.15752029 W
SFO1           125.8131151 MHz
```

```
===== CHANNEL f2 =====
CPDPRG2       waltz16
NUC2           1H
PCPD2         80.00 usec
PL2            -6.00 dB
PL12           12.42 dB
PL13           18.42 dB
PL2W           15.19999981 W
PL12W          0.21869738 W
PL13W          0.05493430 W
SFO2           500.3020012 MHz
SI             32768
SF             125.8005438 MHz
WDW            EM
SSB            0
LB             1.00 Hz
GB             0
PC             1.40
```

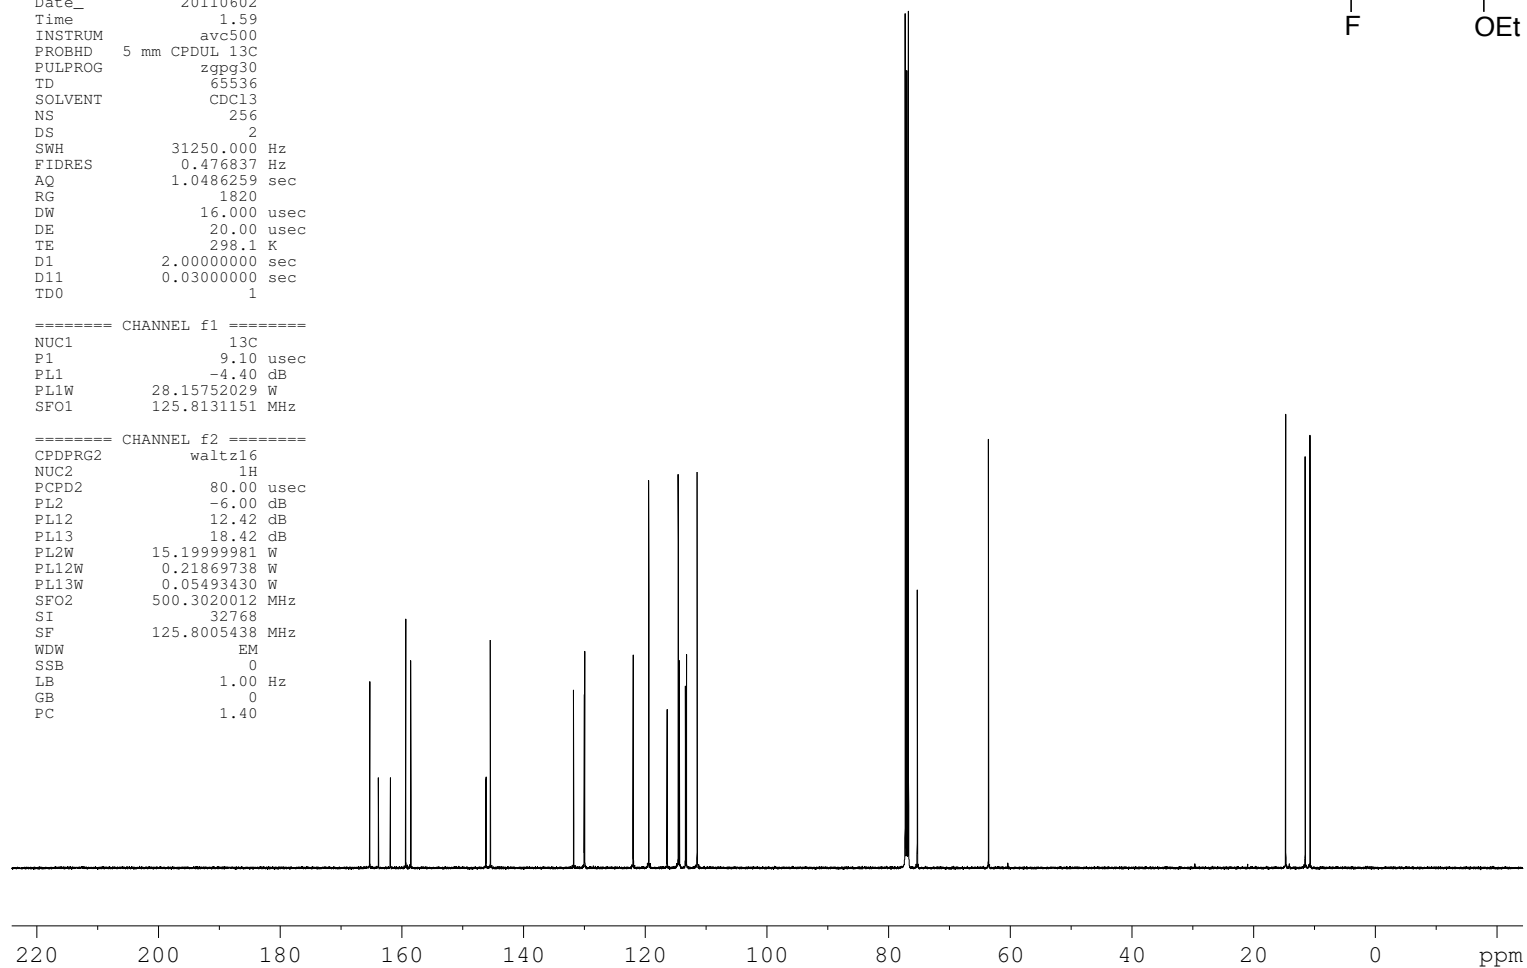

(3-(3,5-Dimethylisoxazol-4-yl)-5-ethoxyphenyl)(3-fluorophenyl)methanol **13** <sup>19</sup>F NMR

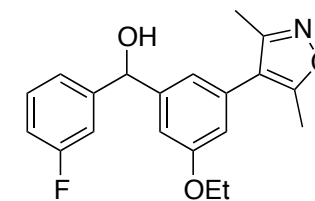

```
NAME          102 F
EXPNO         1
PROCNO        1
Date_         20110602
Time          10.41
INSTRUM       avb500
PROBHD        5 mm PATXI 1H/
PULPROG       zgfhigqn
TD            131072
SOLVENT       CDCl3
NS            16
DS            4
SWH           113636.367 Hz
FIDRES        0.866977 Hz
AQ            0.5767668 sec
RG            1030
DW            4.400 usec
DE            6.50 usec
TE            298.0 K
D1            1.00000000 sec
D11           0.03000000 sec
D12           0.00002000 sec
TD0           1
```

```
===== CHANNEL f1 =====
NUC1          19F
P1            10.00 usec
PL1           0.90 dB
SFO1          470.4041911 MHz
```

```
===== CHANNEL f2 =====
CPDPRG2       waltz16
NUC2          1H
PCPD2         80.00 usec
PL2           1.00 dB
PL12          22.00 dB
PL2W          13.20863628 W
PL12W         0.10491993 W
SFO2          499.9819999 MHz
SI            65536
SF            470.4512360 MHz
WDW           EM
SSB           0
LB            2.00 Hz
GB            0
PC            10.00
```

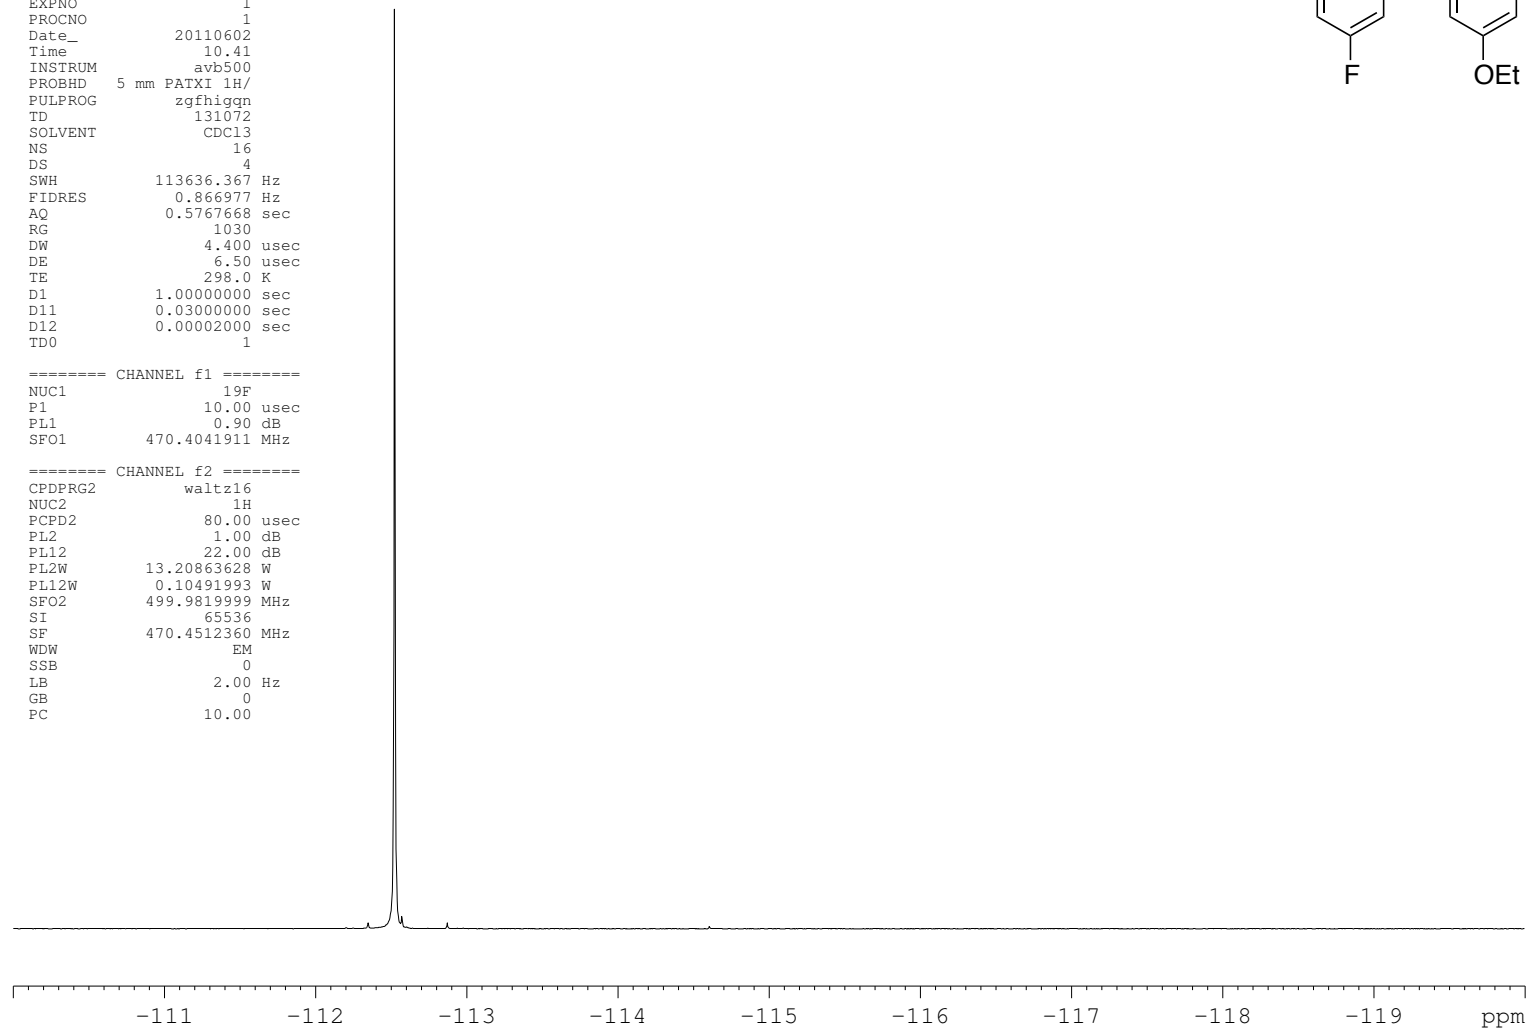

(3-(3,5-Dimethylisoxazol-4-yl)-5-ethoxyphenyl)(4-fluorophenyl)methanol **14** <sup>1</sup>H NMR

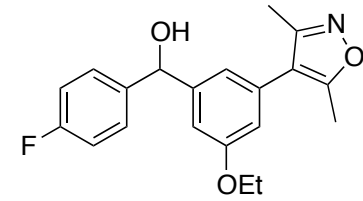

```
NAME      104 H, C
EXPNO     1
PROCNO    1
Date_     20110612
Time      18.32
INSTRUM   ave500
PROBHD    5 mm CPDUL 13C
PULPROG   zg30
TD         65536
SOLVENT   CDCl3
NS         16
DS         2
SWH        10330.578 Hz
FIDRES     0.157632 Hz
AQ         3.1719923 sec
RG         4
DW         48.400 usec
DE         6.00 usec
TE         298.0 K
D1         1.00000000 sec
TD0        1
```

```
===== CHANNEL f1 =====
NUC1       1H
P1         9.60 usec
PL1        -6.00 dB
PL1W       15.19999981 W
SFO1       500.3030896 MHz
SI         32768
SF         500.3000240 MHz
WDW        EM
SSB        0
LB         0.30 Hz
GB         0
PC         1.00
```

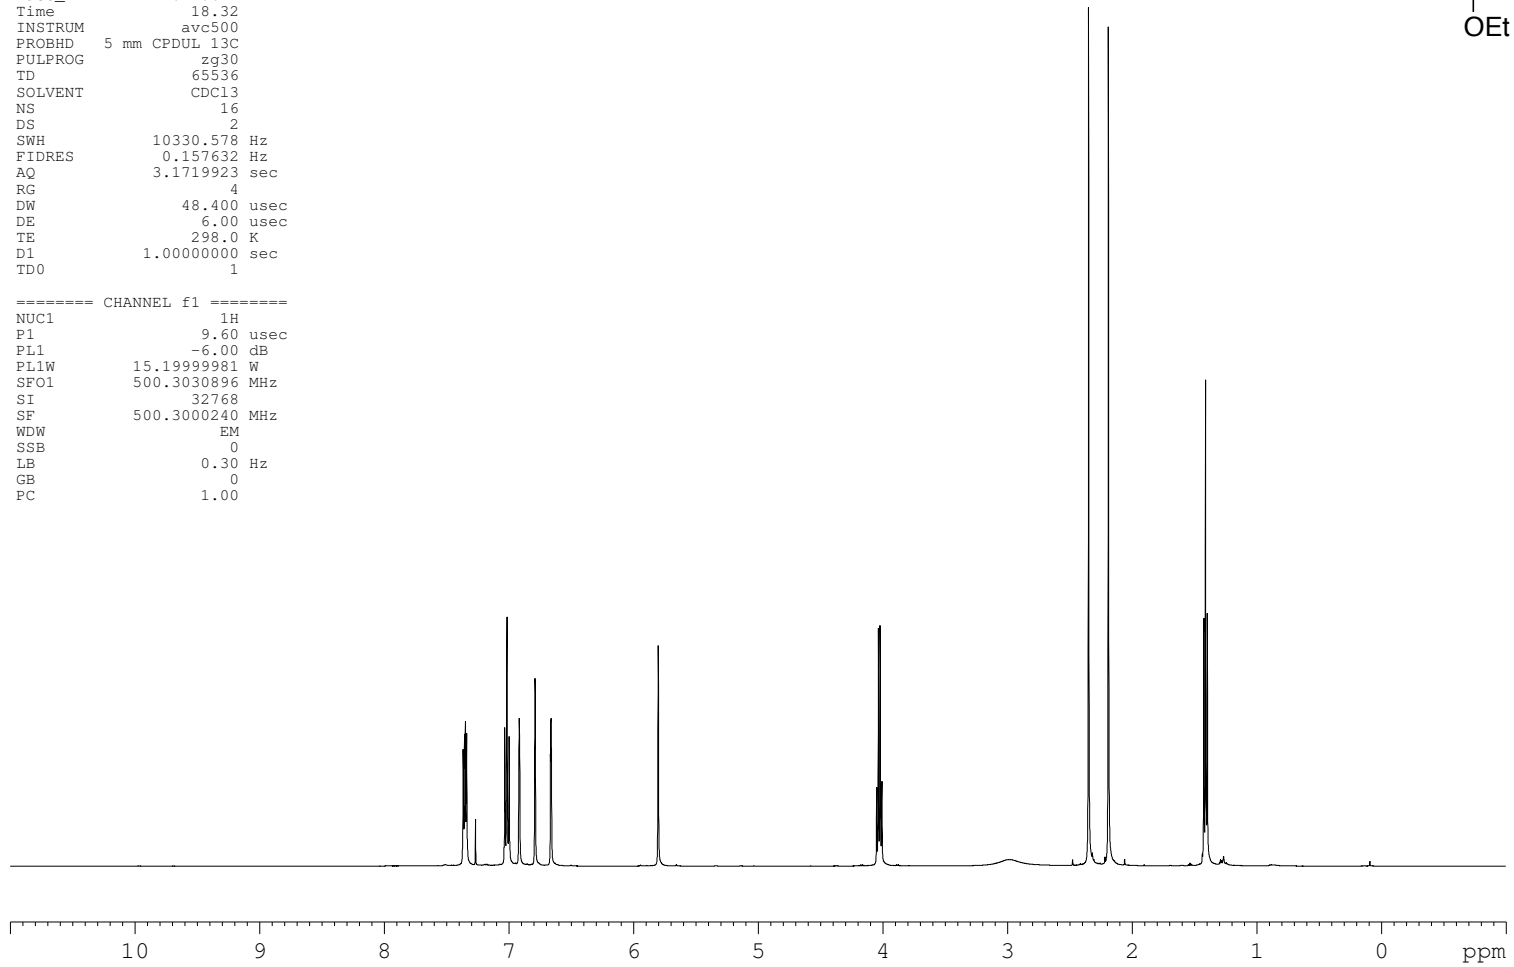



(3-(3,5-Dimethylisoxazol-4-yl)-5-ethoxyphenyl)(4-fluorophenyl)methanol **14** <sup>13</sup>C NMR

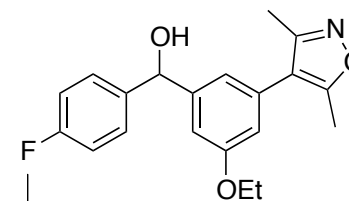

```
NAME          104 H, C
EXPNO         4
PROCNO        1
Date_         20110612
Time          19.02
INSTRUM       avc500
PROBHD        5 mm CPDUL 13C
PULPROG       zgpg30
TD            65536
SOLVENT       CDCl3
NS            256
DS            2
SWH           31250.000 Hz
FIDRES        0.476837 Hz
AQ            1.0486259 sec
RG            1820
DW            16.000 usec
DE            20.00 usec
TE            298.0 K
D1            2.00000000 sec
D11           0.03000000 sec
TD0           1
```

```
===== CHANNEL f1 =====
NUC1           13C
P1             9.10 usec
PL1            -4.40 dB
PL1W          28.15752029 W
SFO1          125.8131151 MHz
```

```
===== CHANNEL f2 =====
CPDPRG2       waltz16
NUC2           1H
PCPD2         80.00 usec
PL2            -6.00 dB
PL12          12.42 dB
PL13          18.42 dB
PL2W          15.19999981 W
PL12W         0.21869738 W
PL13W         0.05493430 W
SFO2          500.3020012 MHz
SI             32768
SF            125.8005438 MHz
WDW            EM
SSB            0
LB             1.00 Hz
GB             0
PC             1.40
```

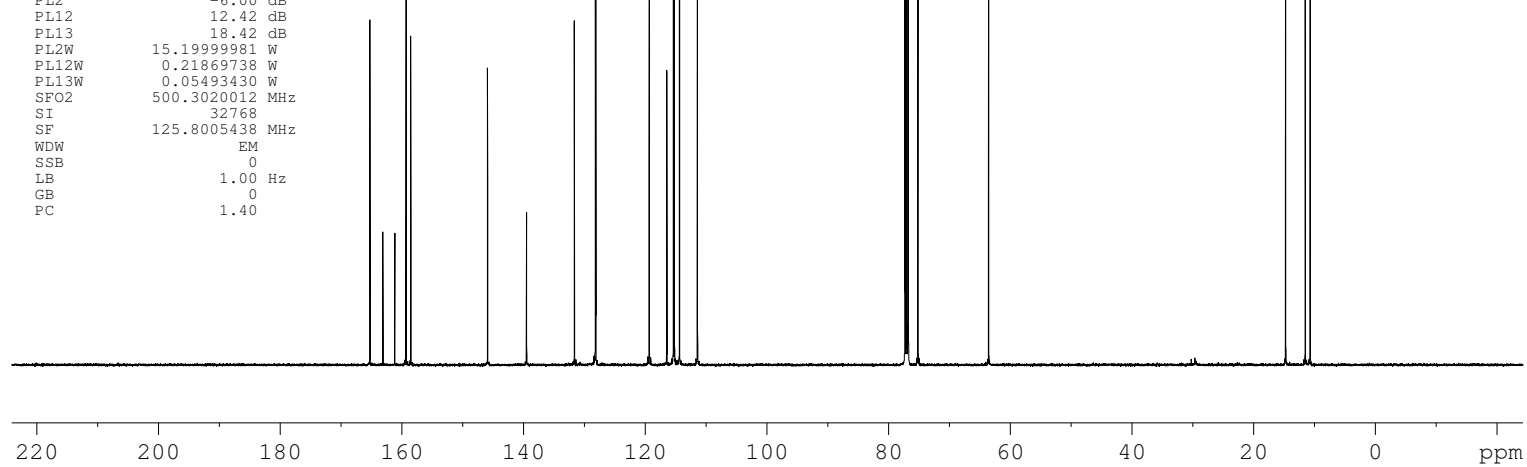

(3-(3,5-Dimethylisoxazol-4-yl)-5-ethoxyphenyl)(4-fluorophenyl)methanol **14** <sup>19</sup>F NMR

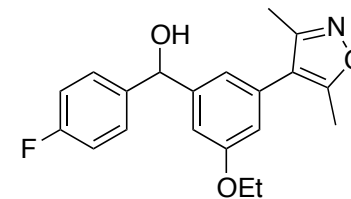

```
NAME          104 F
EXPNO         1
PROCNO        1
Date_         20110620
Time          17.57
INSTRUM       avb500
PROBHD        5 mm PATXI 1H/
PULPROG       zgfhigqn
TD            131072
SOLVENT       CDCl3
NS            16
DS            4
SWH           113636.367 Hz
FIDRES        0.866977 Hz
AQ            0.5767668 sec
RG            812
DW            4.400 usec
DE            6.50 usec
TE            298.0 K
D1            1.00000000 sec
D11           0.03000000 sec
D12           0.00002000 sec
TD0           1
```

```
===== CHANNEL f1 =====
NUC1          19F
P1            10.00 usec
PL1           0.90 dB
SFO1          470.4041911 MHz
```

```
===== CHANNEL f2 =====
CPDPRG2       waltz16
NUC2          1H
PCPD2         80.00 usec
PL2           1.00 dB
PL12          22.00 dB
PL2W          13.20863628 W
PL12W         0.10491993 W
SFO2          499.9819999 MHz
SI            65536
SF            470.4512360 MHz
WDW           EM
SSB           0
LB            2.00 Hz
GB            0
PC            10.00
```

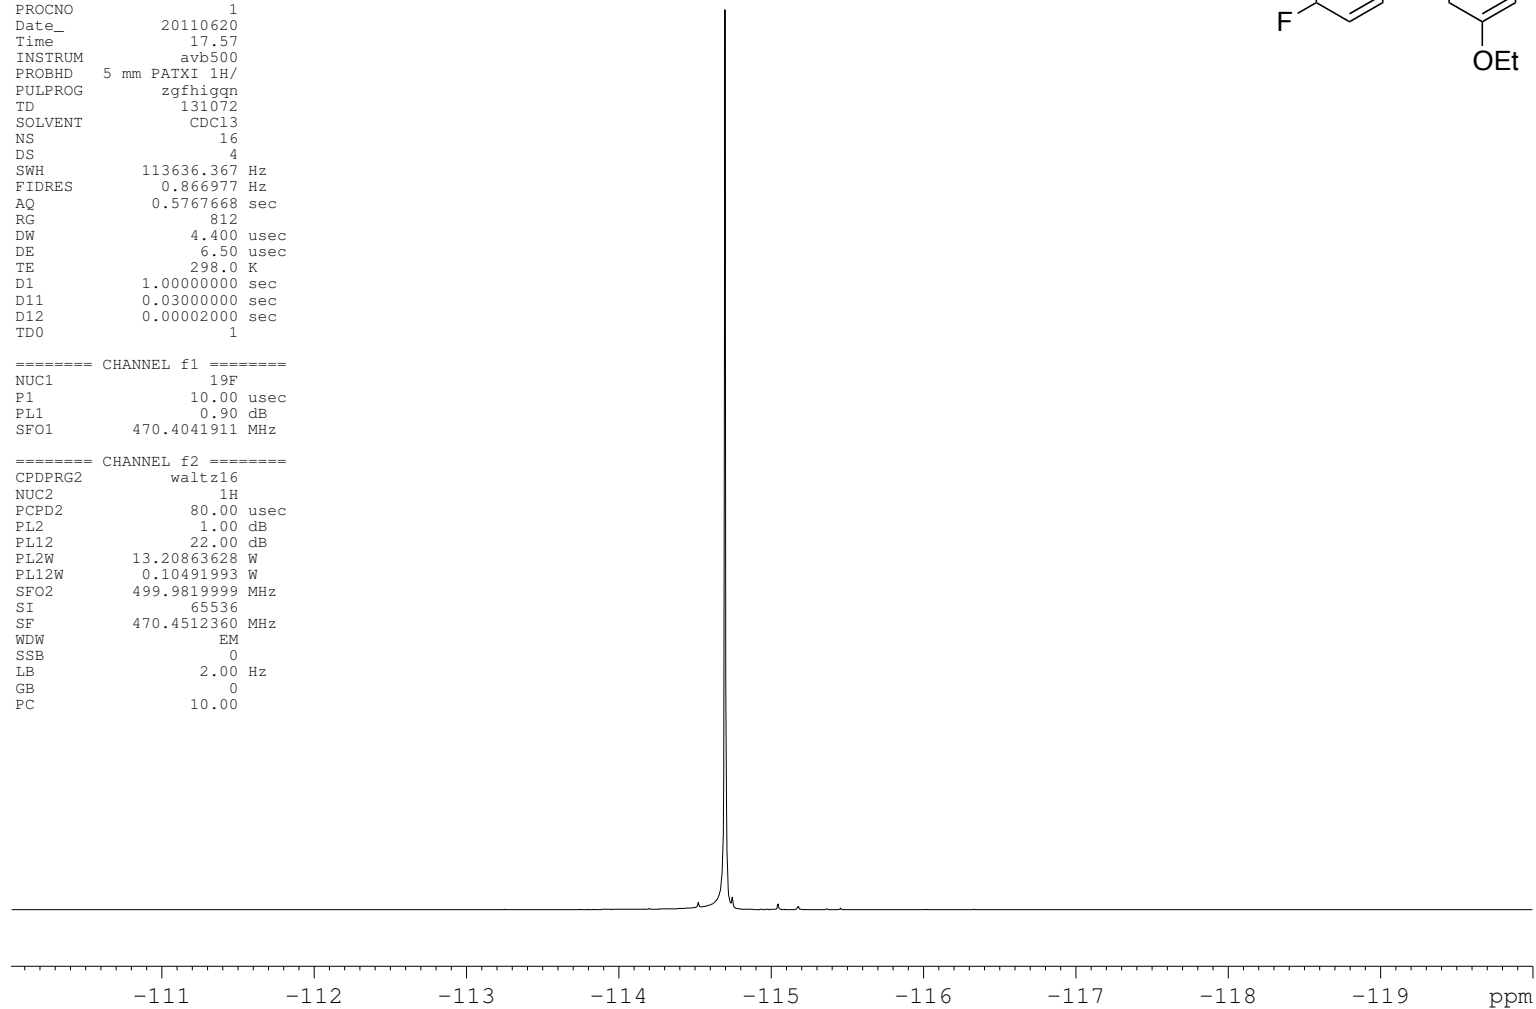

(3-Chlorophenyl)(3-(3,5-dimethylisoxazol-4-yl)-5-ethoxyphenyl)methanol **15** <sup>1</sup>H NMR

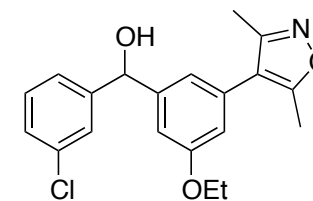

NAME 106  
EXPNO 1  
PROCNO 1  
Date\_ 20110615  
Time 2.58  
INSTRUM drx500  
PROBHD 5 mm PABBO BB/  
PULPROG zg30  
TD 65536  
SOLVENT CDCl3  
NS 16  
DS 2  
SWH 10330.578 Hz  
FIDRES 0.157632 Hz  
AQ 3.1720407 sec  
RG 64  
DW 48.400 usec  
DE 6.00 usec  
TE 298.0 K  
D1 1.0000000 sec  
TD0 1

===== CHANNEL f1 =====  
NUC1 1H  
P1 12.50 usec  
PL1 0.00 dB  
SFO1 500.1330885 MHz  
SI 32768  
SF 500.1300237 MHz  
WDW EM  
SSB 0  
LB 0.30 Hz  
GB 0  
PC 1.00

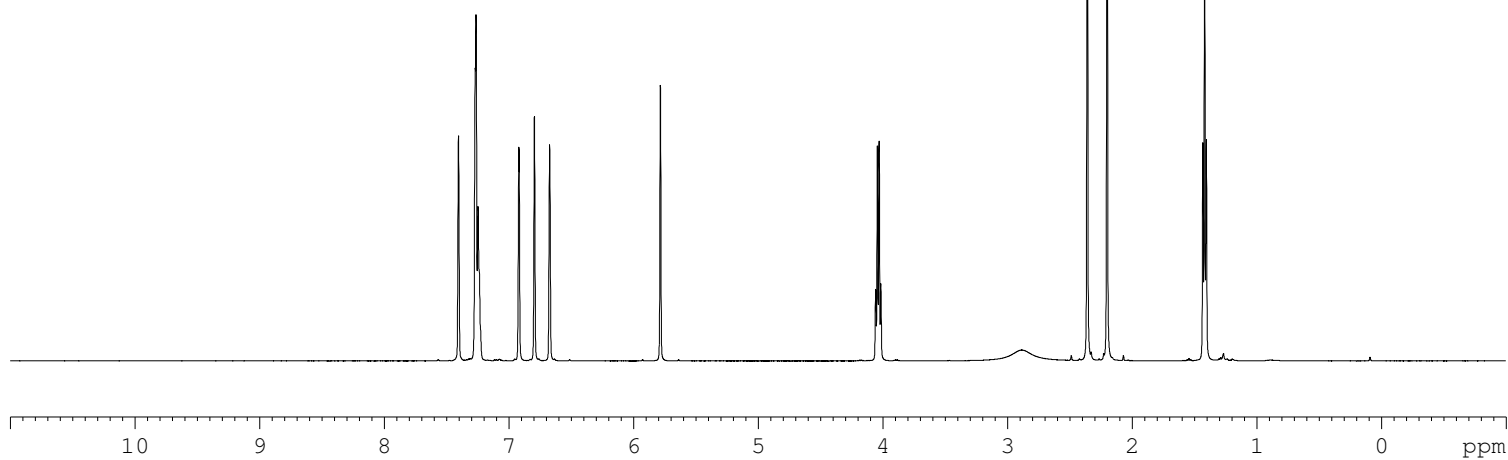

(3-Chlorophenyl)(3-(3,5-dimethylisoxazol-4-yl)-5-ethoxyphenyl)methanol **15** <sup>13</sup>C NMR

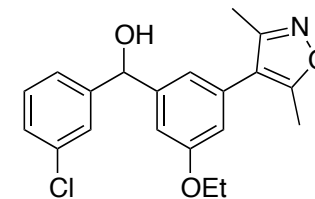

```
NAME          106
EXPNO         5
PROCNO        1
Date_         20110615
Time          4.13
INSTRUM       drx500
PROBHD        5 mm PABBO BB/
PULPROG       zgpg30
TD            65536
SOLVENT       CDCl3
NS            1024
DS            4
SWH           30030.029 Hz
FIDRES        0.458222 Hz
AQ            1.0912410 sec
RG            4096
DW            16.650 usec
DE            6.00 usec
TE            298.0 K
D1            2.0000000 sec
d11           0.0300000 sec
DELTA         1.89999998 sec
TD0           1
```

```
===== CHANNEL f1 =====
NUC1           13C
P1             9.50 usec
PL1            5.00 dB
SFO1          125.7703643 MHz
```

```
===== CHANNEL f2 =====
CPDPRG2       waltz16
NUC2           1H
PCPD2         100.00 usec
PL2            0.00 dB
PL12          19.50 dB
PL13          22.50 dB
SFO2          500.1320005 MHz
SI            32768
SF            125.7577890 MHz
WDW            EM
SSB            0
LB            1.00 Hz
GB            0
PC            1.40
```

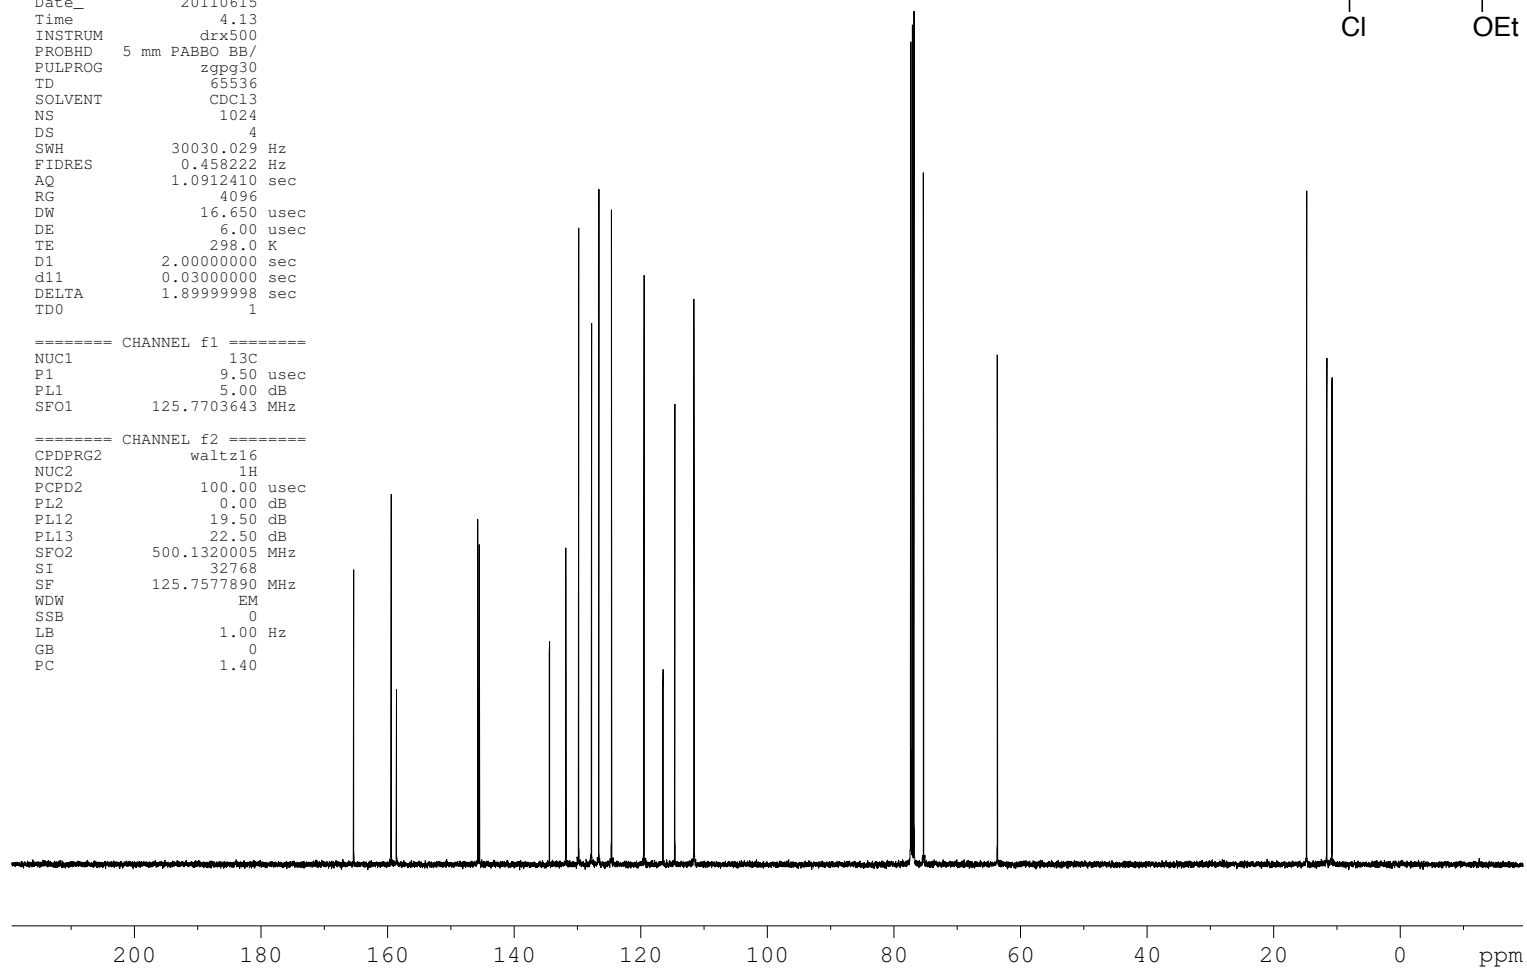

(4-Chlorophenyl)(3-(3,5-dimethylisoxazol-4-yl)-5-ethoxyphenyl)methanol **16** <sup>1</sup>H NMR

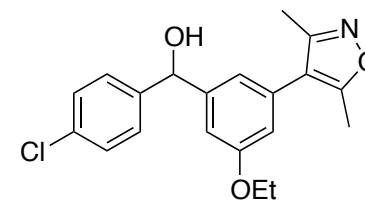

NAME 105  
EXPNO 1  
PROCNO 1  
Date\_ 20110615  
Time 1.36  
INSTRUM drx500  
PROBHD 5 mm PABBO BB/  
PULPROG zg30  
TD 65536  
SOLVENT CDCl3  
NS 16  
DS 2  
SWH 10330.578 Hz  
FIDRES 0.157632 Hz  
AQ 3.1720407 sec  
RG 114  
DW 48.400 usec  
DE 6.00 usec  
TE 298.1 K  
D1 1.0000000 sec  
TD0 1

===== CHANNEL f1 =====  
NUC1 1H  
P1 12.50 usec  
PL1 0.00 dB  
SFO1 500.1330885 MHz  
SI 32768  
SF 500.1300237 MHz  
WDW EM  
SSB 0  
LB 0.30 Hz  
GB 0  
PC 1.00

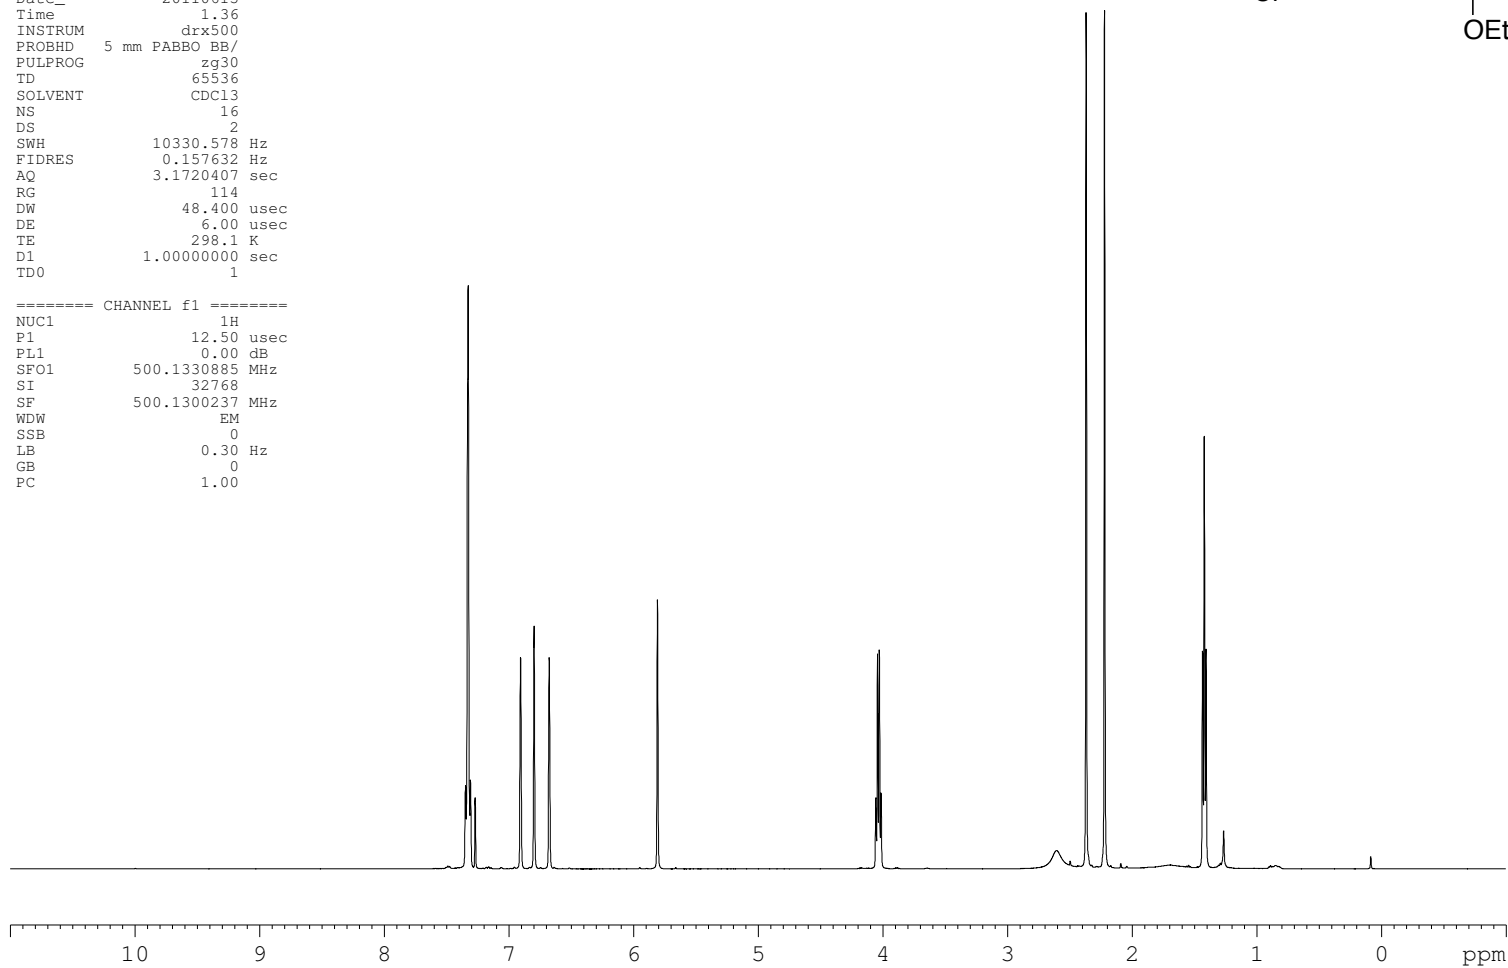

(4-Chlorophenyl)(3-(3,5-dimethylisoxazol-4-yl)-5-ethoxyphenyl)methanol **16** <sup>13</sup>C NMR

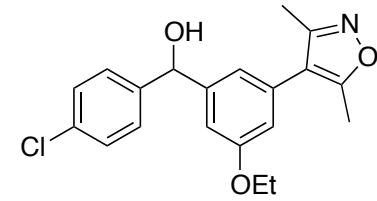

NAME 105  
EXPNO 4  
PROCNO 1  
Date\_ 20110615  
Time 2.52  
INSTRUM drx500  
PROBHD 5 mm PABBO BB/  
PULPROG zgpg30  
TD 65536  
SOLVENT CDCl3  
NS 1024  
DS 4  
SWH 30030.029 Hz  
FIDRES 0.458222 Hz  
AQ 1.0912410 sec  
RG 8192  
DW 16.650 usec  
DE 6.00 usec  
TE 298.0 K  
D1 2.0000000 sec  
d11 0.0300000 sec  
DELTA 1.89999998 sec  
TD0 1

===== CHANNEL f1 =====  
NUC1 13C  
P1 9.50 usec  
PL1 5.00 dB  
SFO1 125.7703643 MHz

===== CHANNEL f2 =====  
CPDPRG2 waltz16  
NUC2 1H  
PCPD2 100.00 usec  
PL2 0.00 dB  
PL12 19.50 dB  
PL13 22.50 dB  
SFO2 500.1320005 MHz  
SI 32768  
SF 125.7577890 MHz  
WDW EM  
SSB 0  
LB 1.00 Hz  
GB 0  
PC 1.40

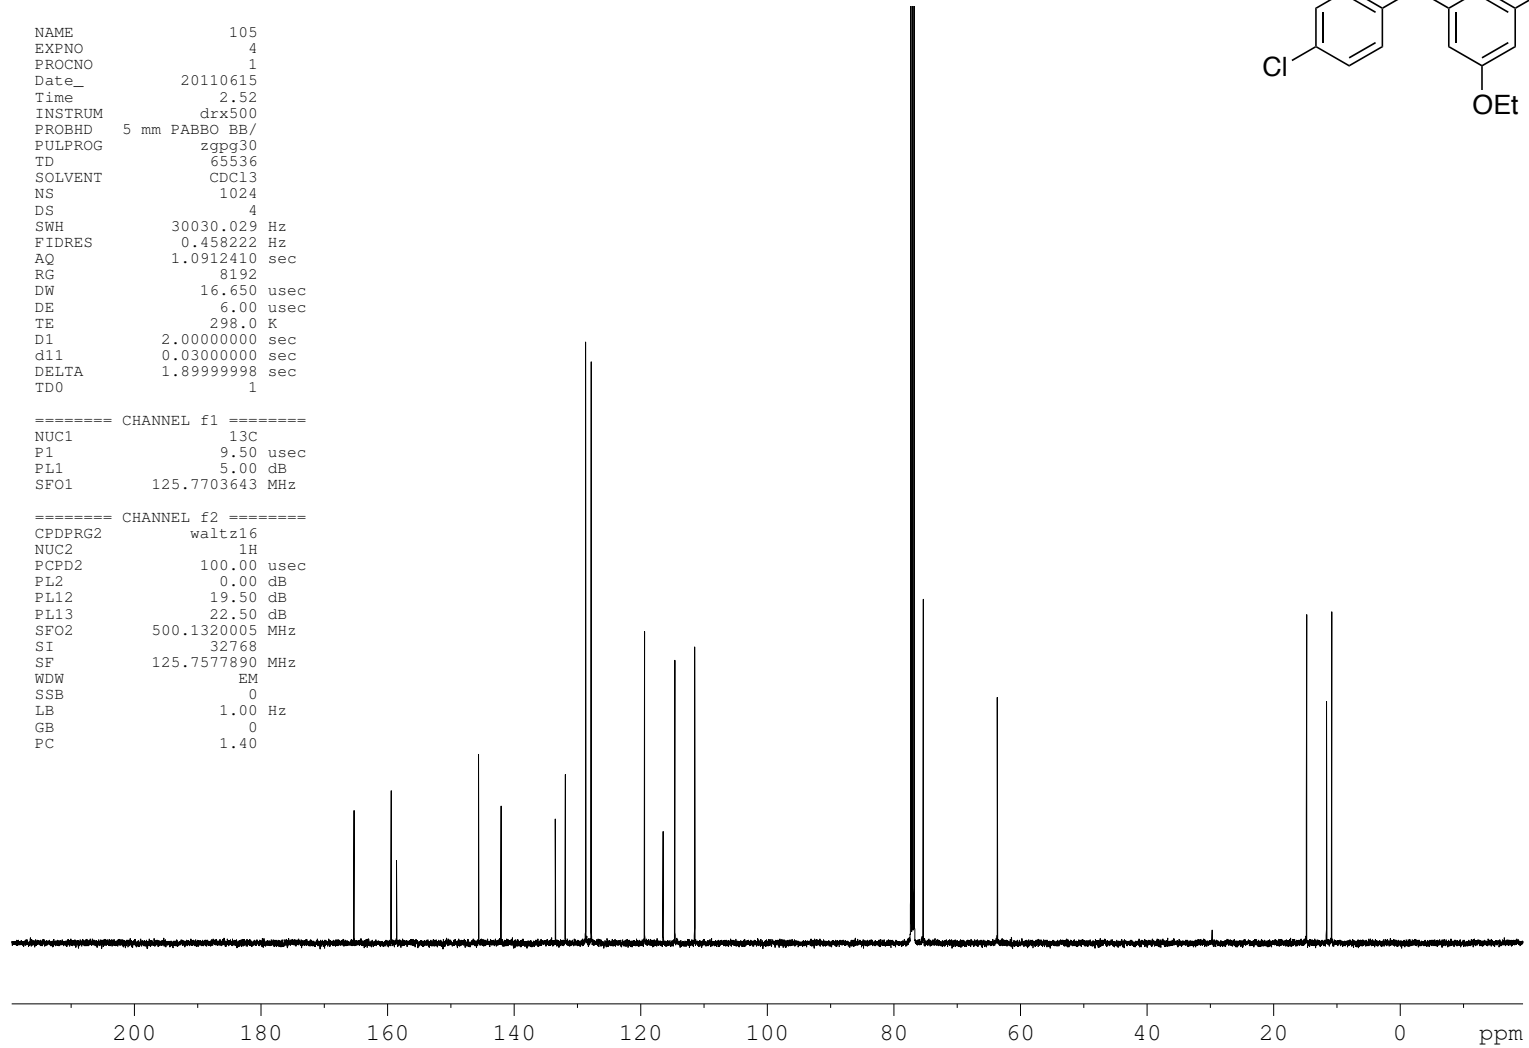

(3-(3,5-Dimethylisoxazol-4-yl)-5-hydroxyphenyl)(phenyl)methanone **17** <sup>1</sup>H NMR

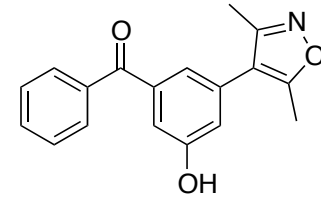

NAME 247  
EXPNO 1  
PROCNO 1  
Date\_ 20120818  
Time 18.40  
INSTRUM avc500  
PROBHD 5 mm CPDUL 13C  
PULPROG zg30  
TD 65536  
SOLVENT Acetone  
NS 16  
DS 2  
SWH 10330.578 Hz  
FIDRES 0.157632 Hz  
AQ 3.1719923 sec  
RG 4  
DW 48.400 usec  
DE 6.00 usec  
TE 298.0 K  
D1 1.00000000 sec  
TD0 1

===== CHANNEL f1 =====  
NUC1 1H  
P1 9.60 usec  
PL1 -6.00 dB  
PL1W 15.19999981 W  
SFO1 500.3030896 MHz  
SI 32768  
SF 500.3000000 MHz  
WDW EM  
SSB 0  
LB 0.30 Hz  
GB 0  
PC 1.00

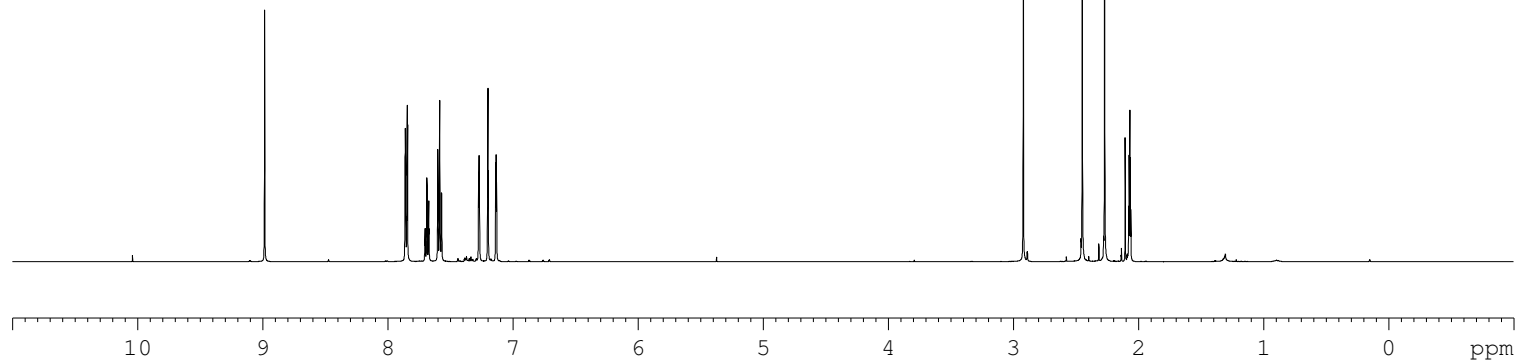

(3-(3,5-Dimethylisoxazol-4-yl)-5-hydroxyphenyl)(phenyl)methanone **17** <sup>13</sup>C NMR

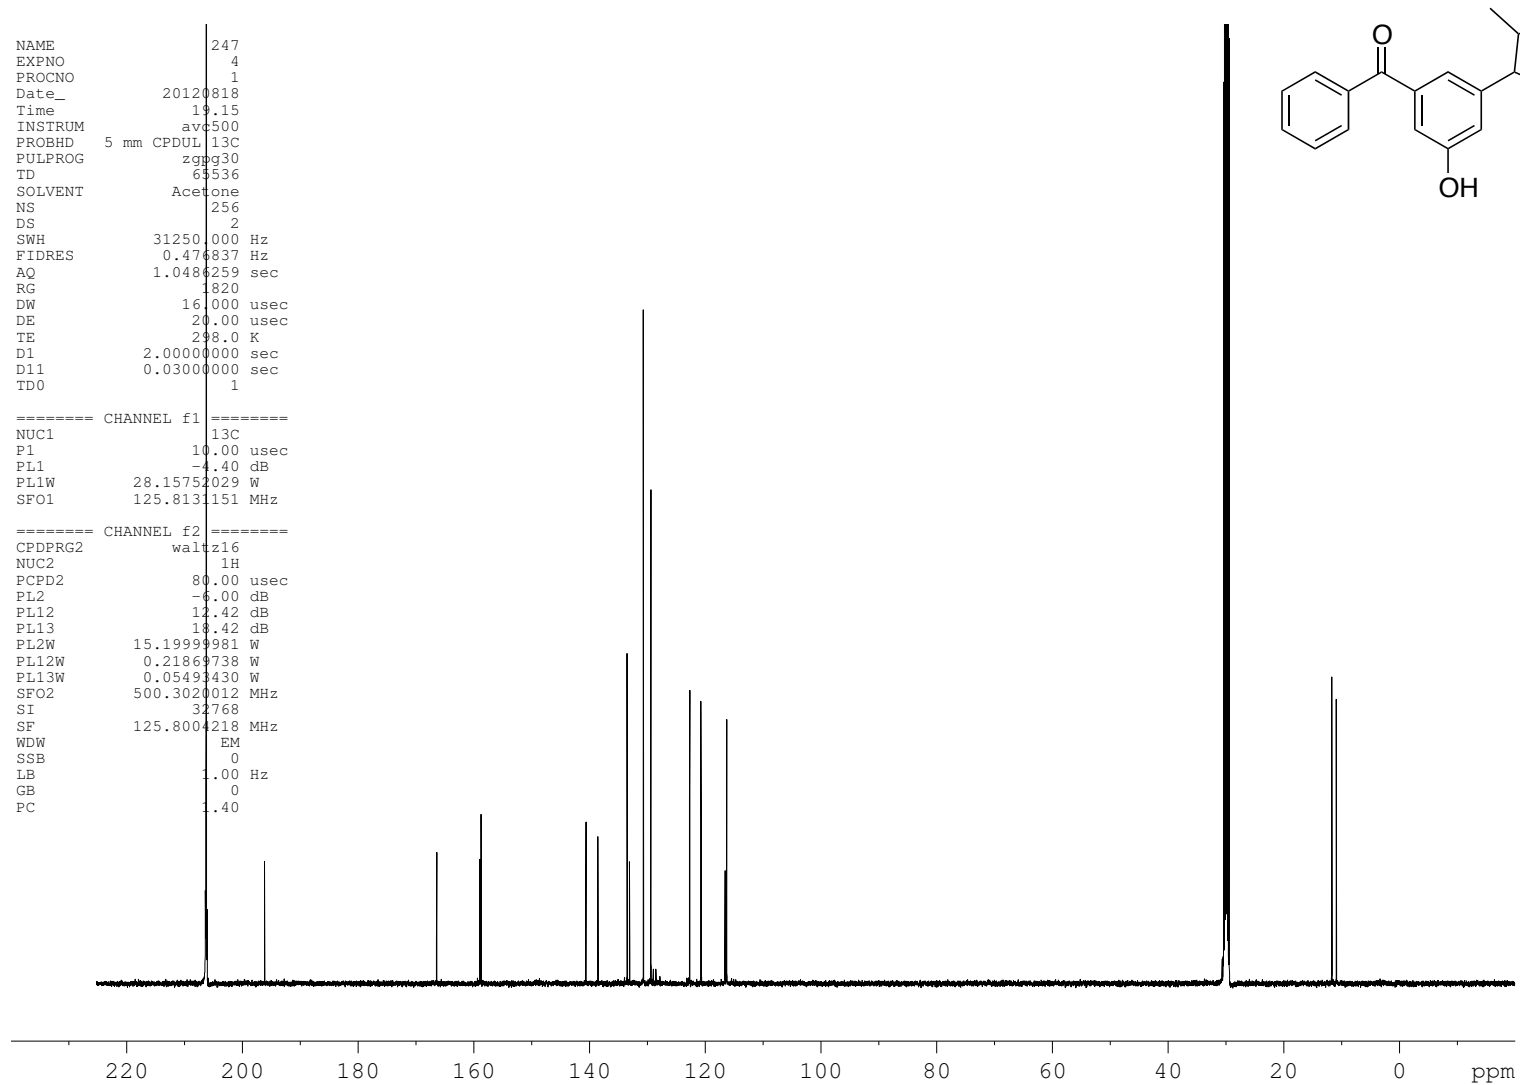



3-(3,5-Dimethylisoxazol-4-yl)-5-(hydroxy(phenyl)methyl)phenol **8** <sup>1</sup>H NMR

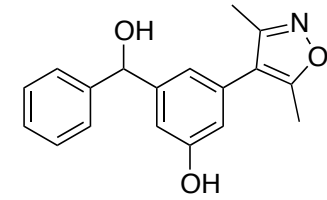

```
NAME          122
EXPNO         1
PROCNO        1
Date_         20110716
Time          14.07
INSTRUM       ave500
PROBHD        5 mm CPDUL 13C
PULPROG       zg30
TD            65536
SOLVENT       Acetone
NS            16
DS            2
SWH           10330.578 Hz
FIDRES        0.157632 Hz
AQ            3.1719923 sec
RG            4
DW            48.400 usec
DE            6.00 usec
TE            298.0 K
D1            1.0000000 sec
TD0           1
```

```
===== CHANNEL f1 =====
NUC1          1H
P1            9.60 usec
PL1          -6.00 dB
PL1W         15.19999981 W
SFO1         500.3030896 MHz
SI           32768
SF           500.3000000 MHz
WDW           EM
SSB           0
LB           0.30 Hz
GB           0
PC           1.00
```

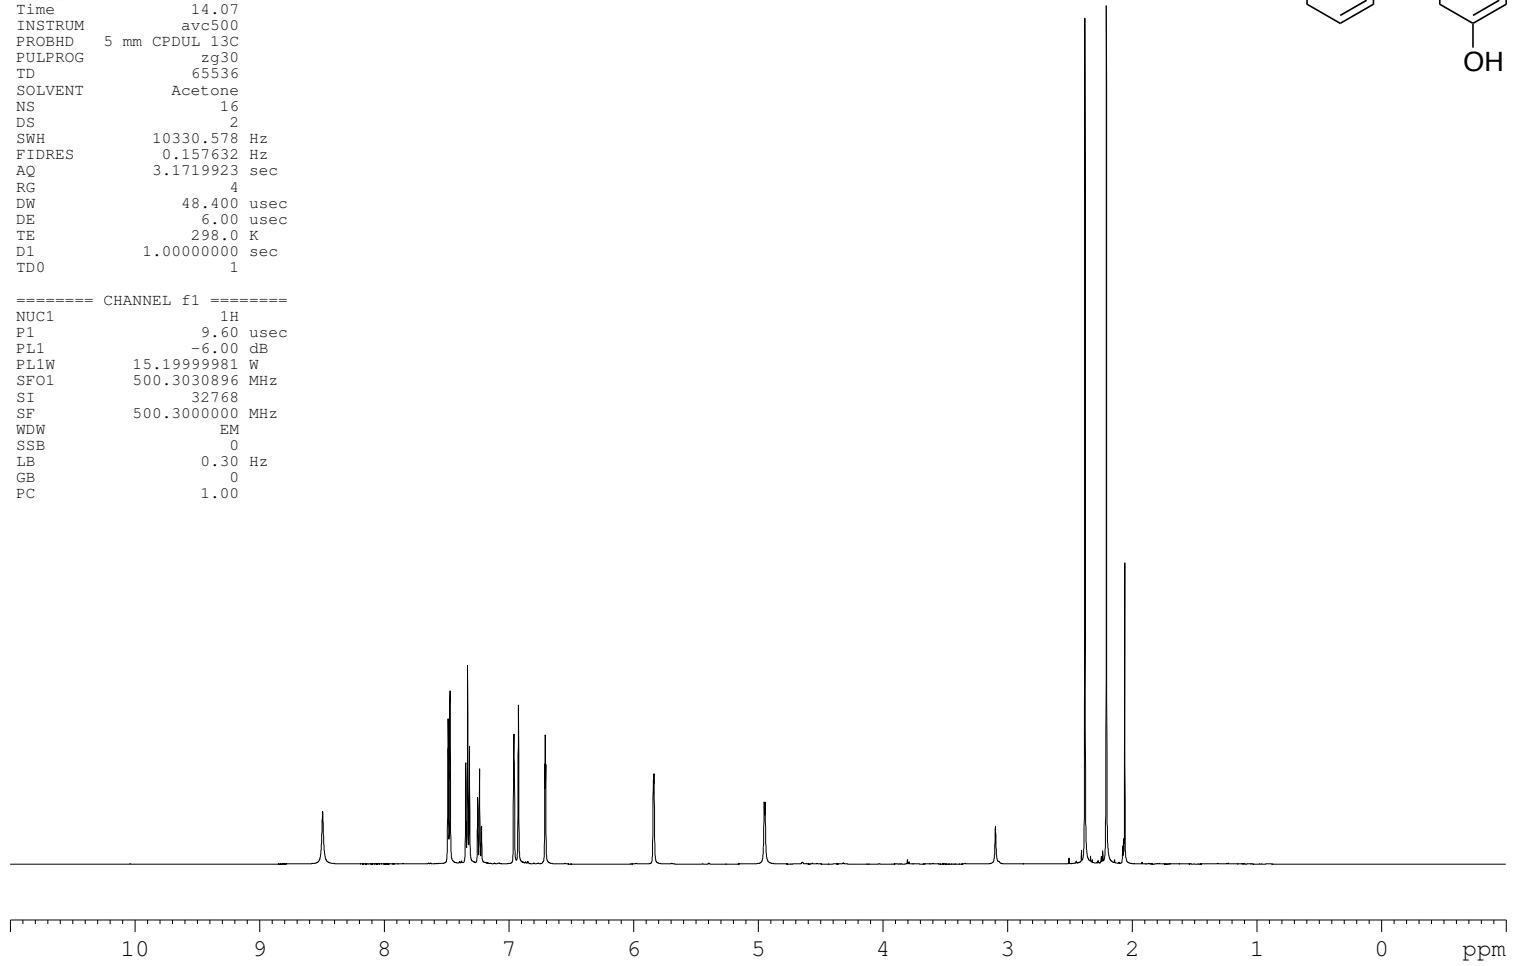

3-(3,5-Dimethylisoxazol-4-yl)-5-(hydroxy(phenyl)methyl)phenol **8** <sup>13</sup>C NMR

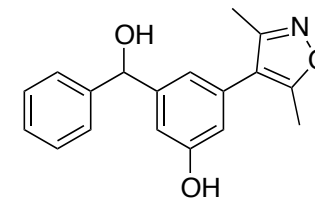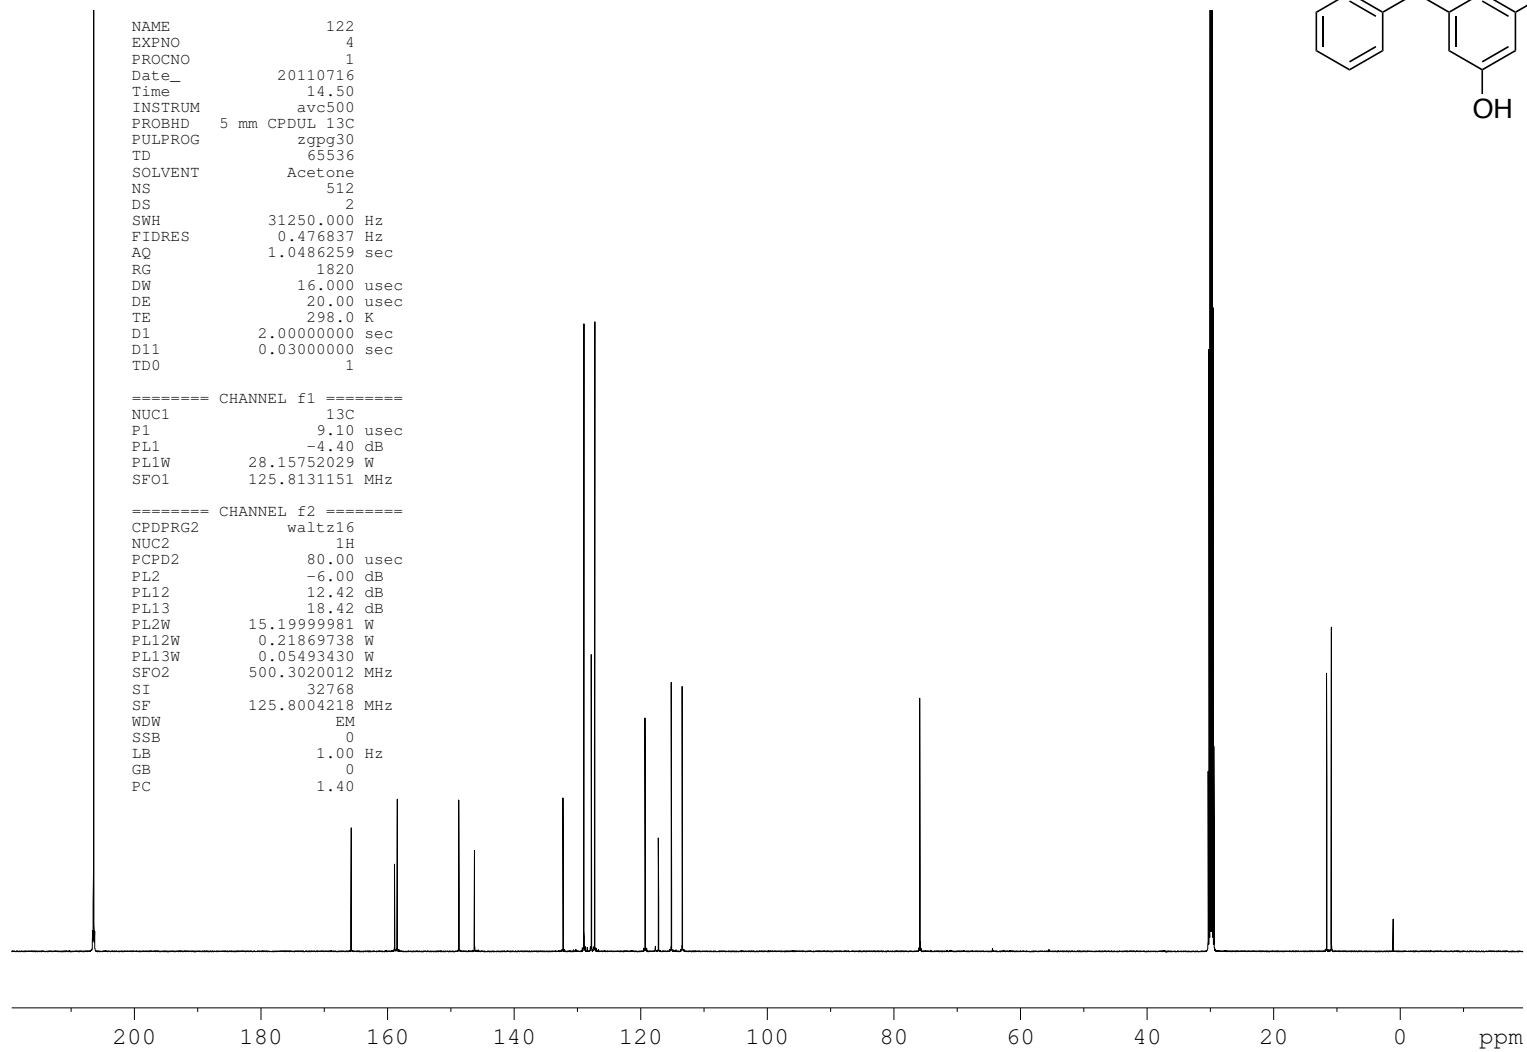

3-(3,5-Dimethylisoxazol-4-yl)-5-(hydroxy(phenyl)methyl)phenyl acetate **9** <sup>1</sup>H NMR

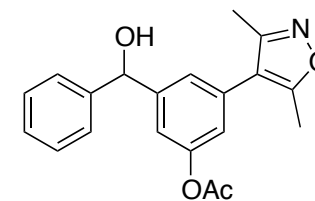

```
NAME          125
EXPNO         1
PROCNO        1
Date_         20110713
Time          16.47
INSTRUM       ave500
PROBHD        5 mm CPDUL 13C
PULPROG       zg30
TD            65536
SOLVENT       CDCl3
NS            16
DS            2
SWH           10330.578 Hz
FIDRES        0.157632 Hz
AQ            3.1719923 sec
RG            4
DW            48.400 usec
DE            6.00 usec
TE            298.0 K
D1            1.0000000 sec
TD0           1
```

```
===== CHANNEL f1 =====
NUC1          1H
P1            9.60 usec
PL1          -6.00 dB
PL1W         15.19999981 W
SFO1         500.3030896 MHz
SI           32768
SF           500.3000240 MHz
WDW           EM
SSB           0
LB           0.30 Hz
GB           0
PC           1.00
```

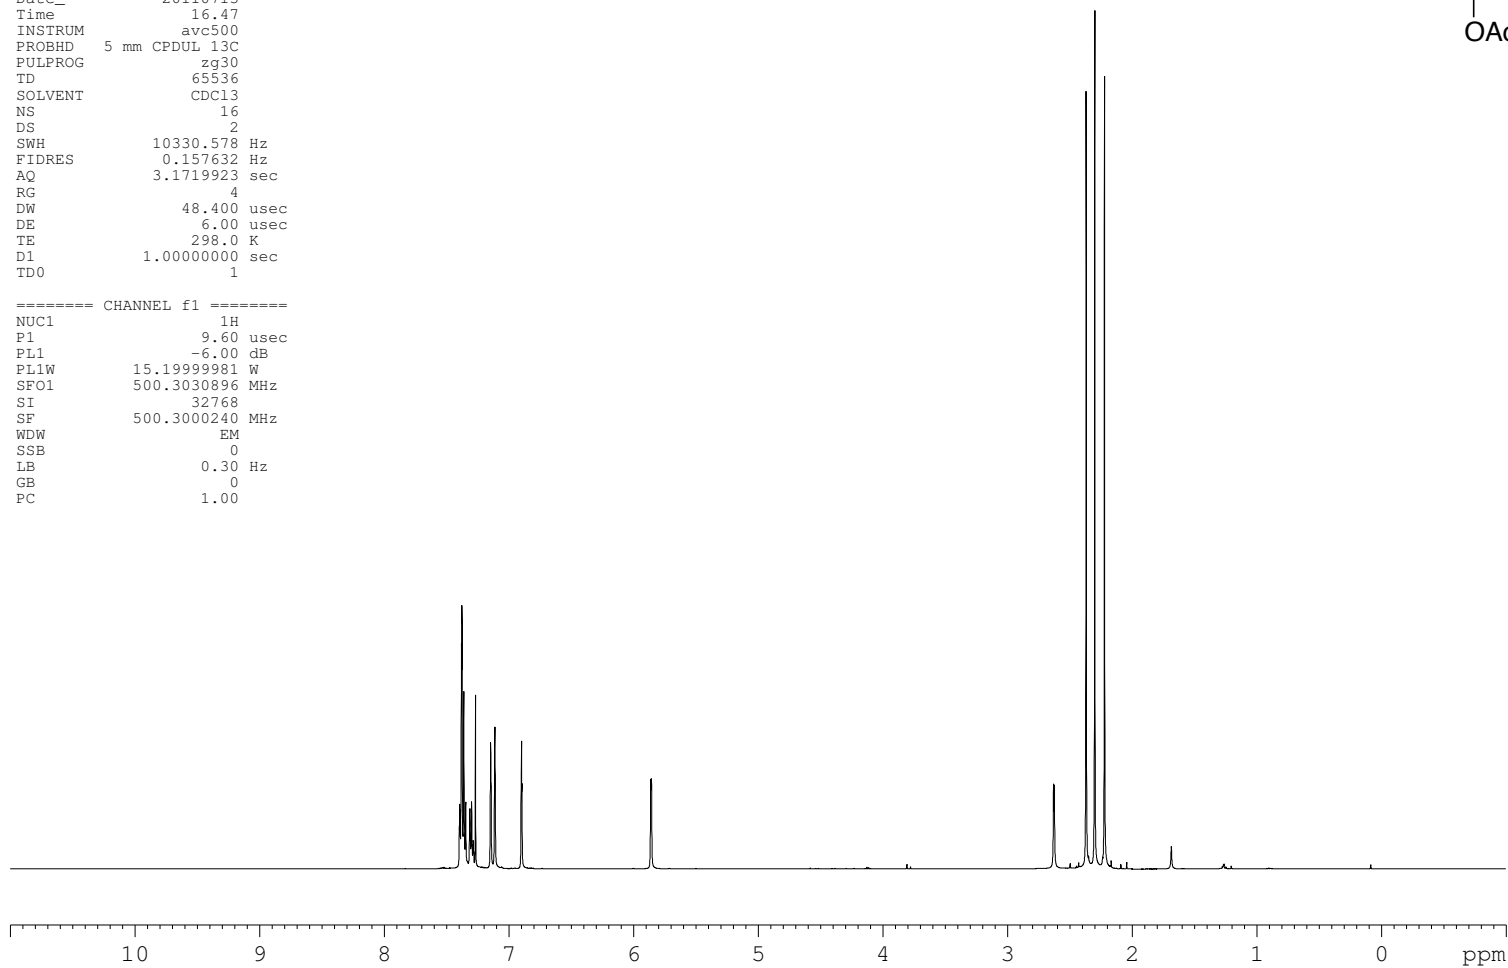

3-(3,5-Dimethylisoxazol-4-yl)-5-(hydroxy(phenyl)methyl)phenyl acetate **9**  $^{13}\text{C}$  NMR

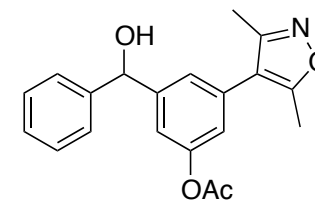

```

NAME          125
EXPNO         4
PROCNO        1
Date_         20110713
Time          17.30
INSTRUM       avc500
PROBHD        5 mm CPDUL 13C
PULPROG       zgpg30
TD            65536
SOLVENT       CDCl3
NS            512
DS            2
SWH           31250.000 Hz
FIDRES        0.476837 Hz
AQ            1.0486259 sec
RG            1820
DW            16.000 usec
DE            20.00 usec
TE            298.0 K
D1            2.00000000 sec
D11           0.03000000 sec
TD0           1
    
```

```

===== CHANNEL f1 =====
NUC1          13C
P1            9.10 usec
PL1           -4.40 dB
PL1W          28.15752029 W
SFO1          125.8131151 MHz
    
```

```

===== CHANNEL f2 =====
CPDPRG2       waltz16
NUC2          1H
PCPD2         80.00 usec
PL2           -6.00 dB
PL12          12.42 dB
PL13          18.42 dB
PL2W          15.19999981 W
PL12W         0.21869738 W
PL13W         0.05493430 W
SFO2          500.3020012 MHz
SI            32768
SF            125.8005438 MHz
WDW           EM
SSB           0
LB            1.00 Hz
GB            0
PC            1.40
    
```

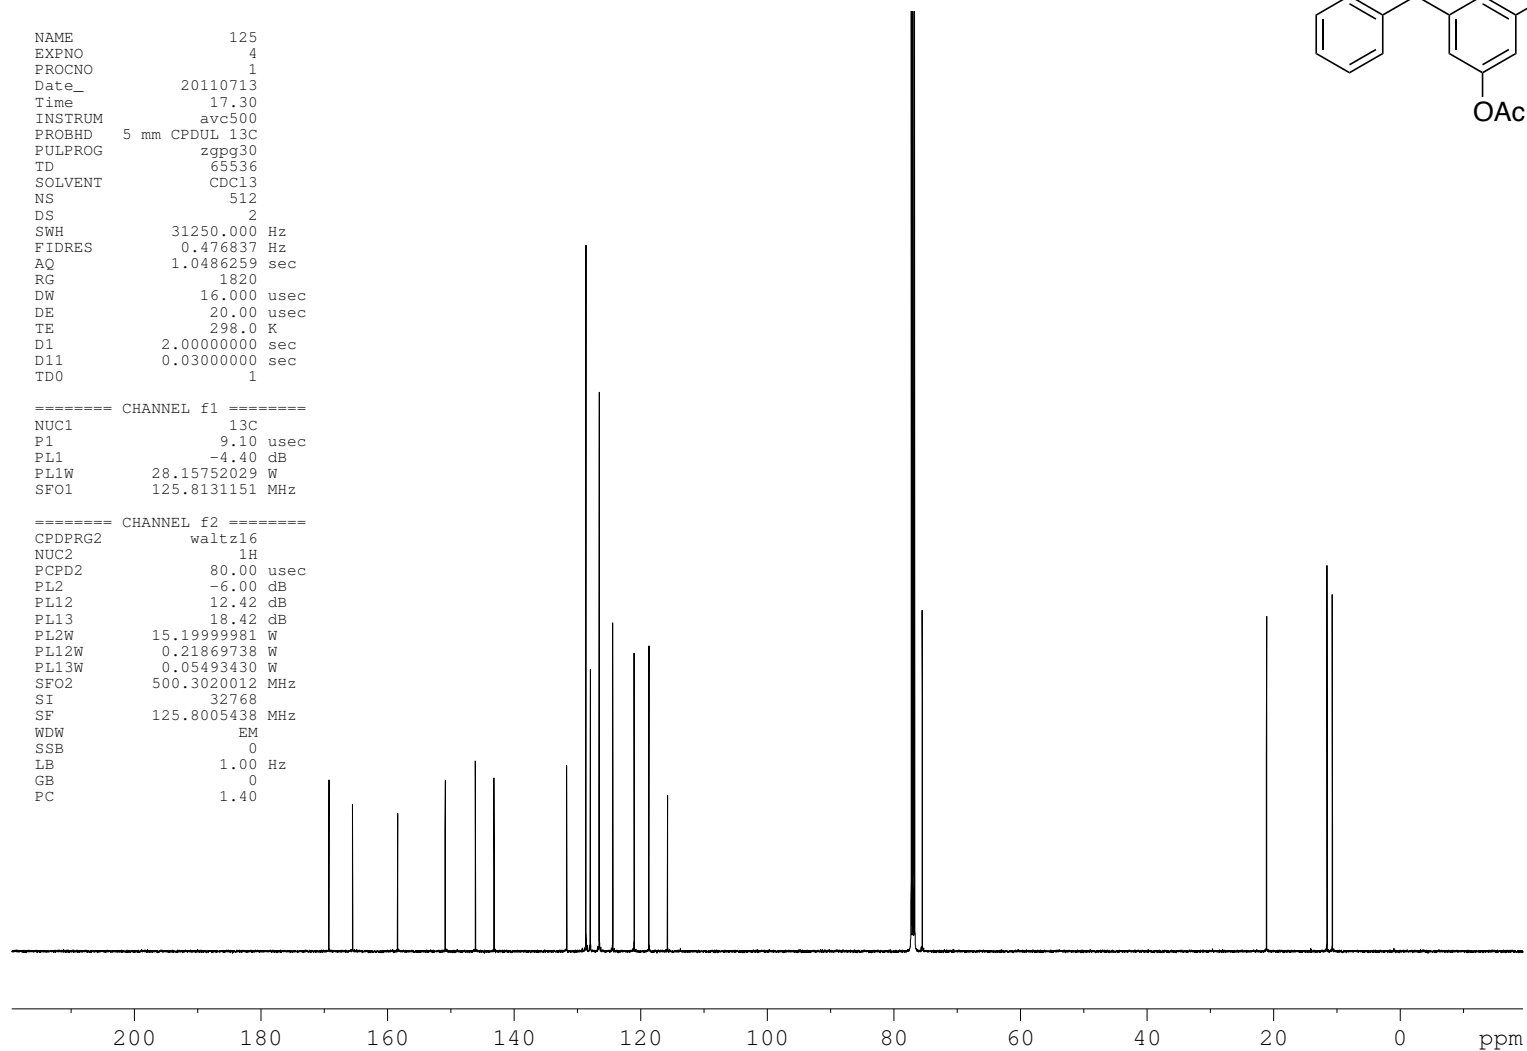

3-(3,5-Dimethylisoxazol-4-yl)-5-methoxybenzaldehyde **18** <sup>1</sup>H NMR

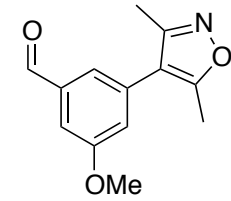

```
NAME          124
EXPNO         1
PROCNO        1
Date_         20110712
Time          14.48
INSTRUM       ave500
PROBHD        5 mm CPDUL 13C
PULPROG       zg30
TD            65536
SOLVENT       CDCl3
NS            16
DS            2
SWH           10330.578 Hz
FIDRES        0.157632 Hz
AQ            3.1719923 sec
RG            4
DW            48.400 usec
DE            6.00 usec
TE            298.1 K
D1            1.0000000 sec
TD0           1
```

```
===== CHANNEL f1 =====
NUC1          1H
P1            9.60 usec
PL1          -6.00 dB
PL1W         15.19999981 W
SFO1         500.3030896 MHz
SI           32768
SF           500.3000240 MHz
WDW           EM
SSB           0
LB           0.30 Hz
GB           0
PC           1.00
```

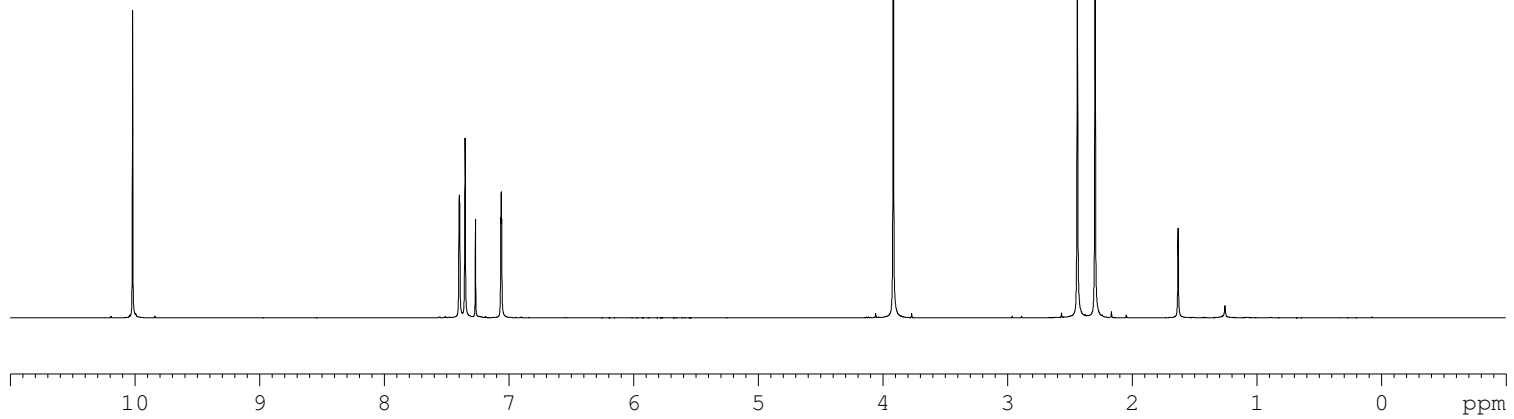

3-(3,5-Dimethylisoxazol-4-yl)-5-methoxybenzaldehyde **18** <sup>13</sup>C NMR

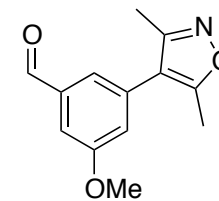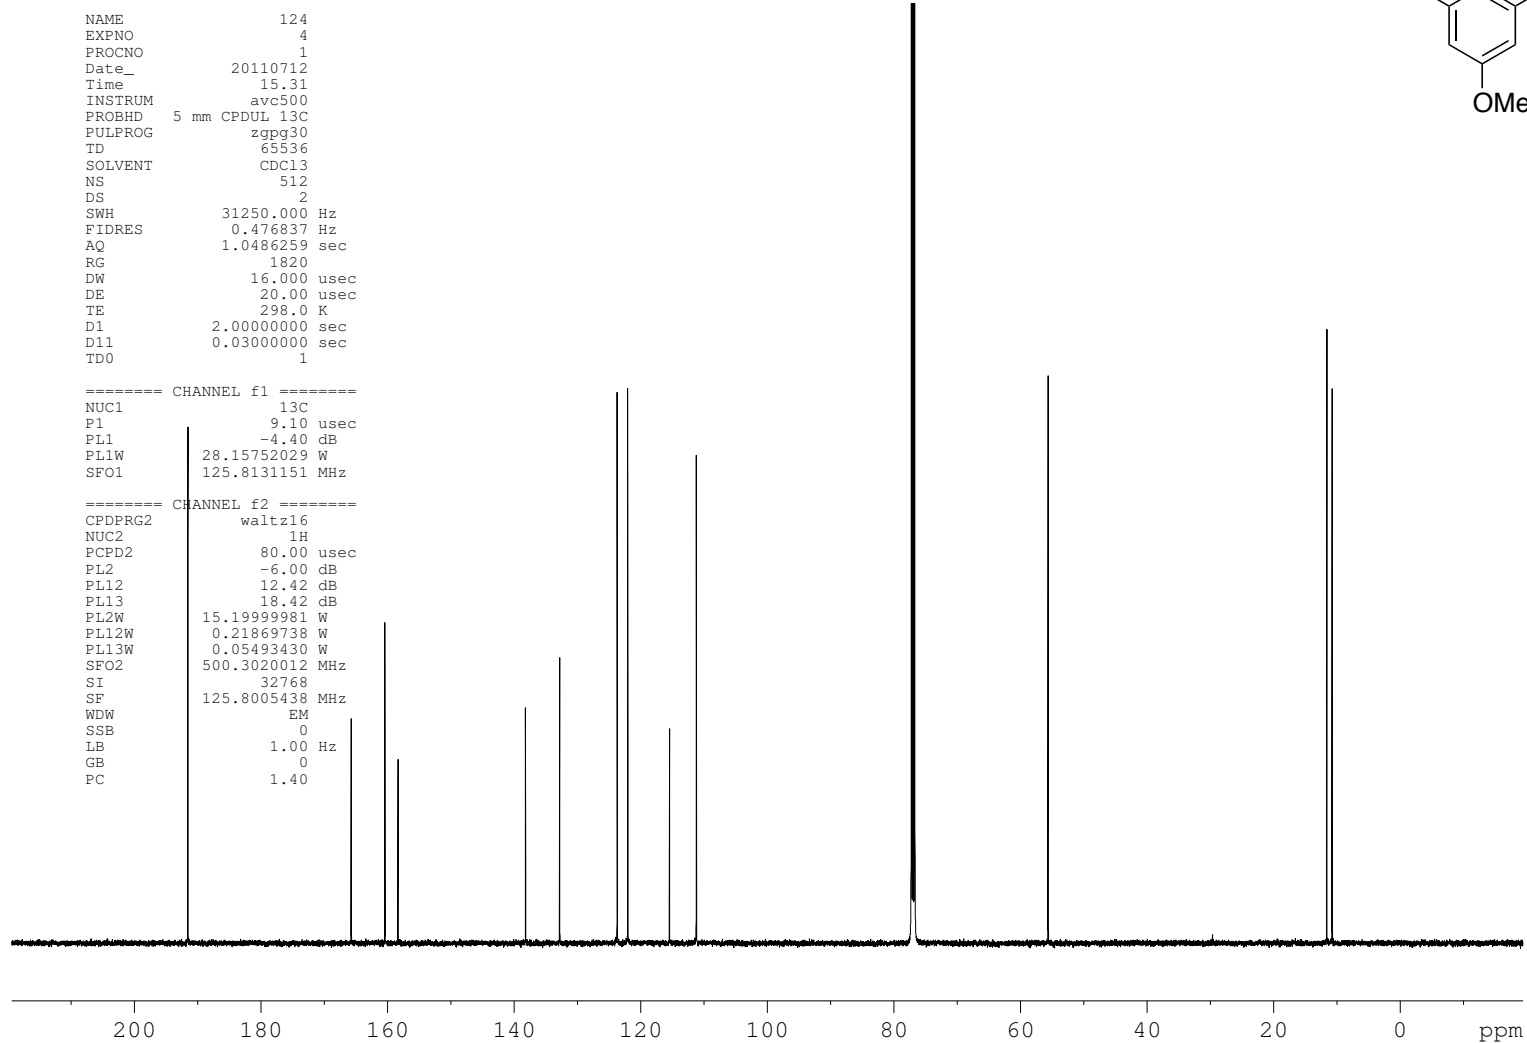

3-(3,5-Dimethylisoxazol-4-yl)-5-(2-methoxyethoxy)benzaldehyde **19** <sup>1</sup>H NMR

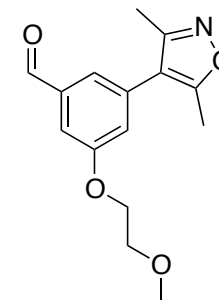

NAME 129  
EXPNO 1  
PROCNO 1  
Date\_ 20110727  
Time 5.35  
INSTRUM ave500  
PROBHD 5 mm CPDUL 13C  
PULPROG zg30  
TD 65536  
SOLVENT CDCl3  
NS 16  
DS 2  
SWH 10330.578 Hz  
FIDRES 0.157632 Hz  
AQ 3.1719923 sec  
RG 4  
DW 48.400 usec  
DE 6.00 usec  
TE 298.0 K  
D1 1.0000000 sec  
TD0 1

===== CHANNEL f1 =====  
NUC1 1H  
P1 9.60 usec  
PL1 -6.00 dB  
PL1W 15.19999981 W  
SFO1 500.3030896 MHz  
SI 32768  
SF 500.3000240 MHz  
WDW EM  
SSB 0  
LB 0.30 Hz  
GB 0  
PC 1.00

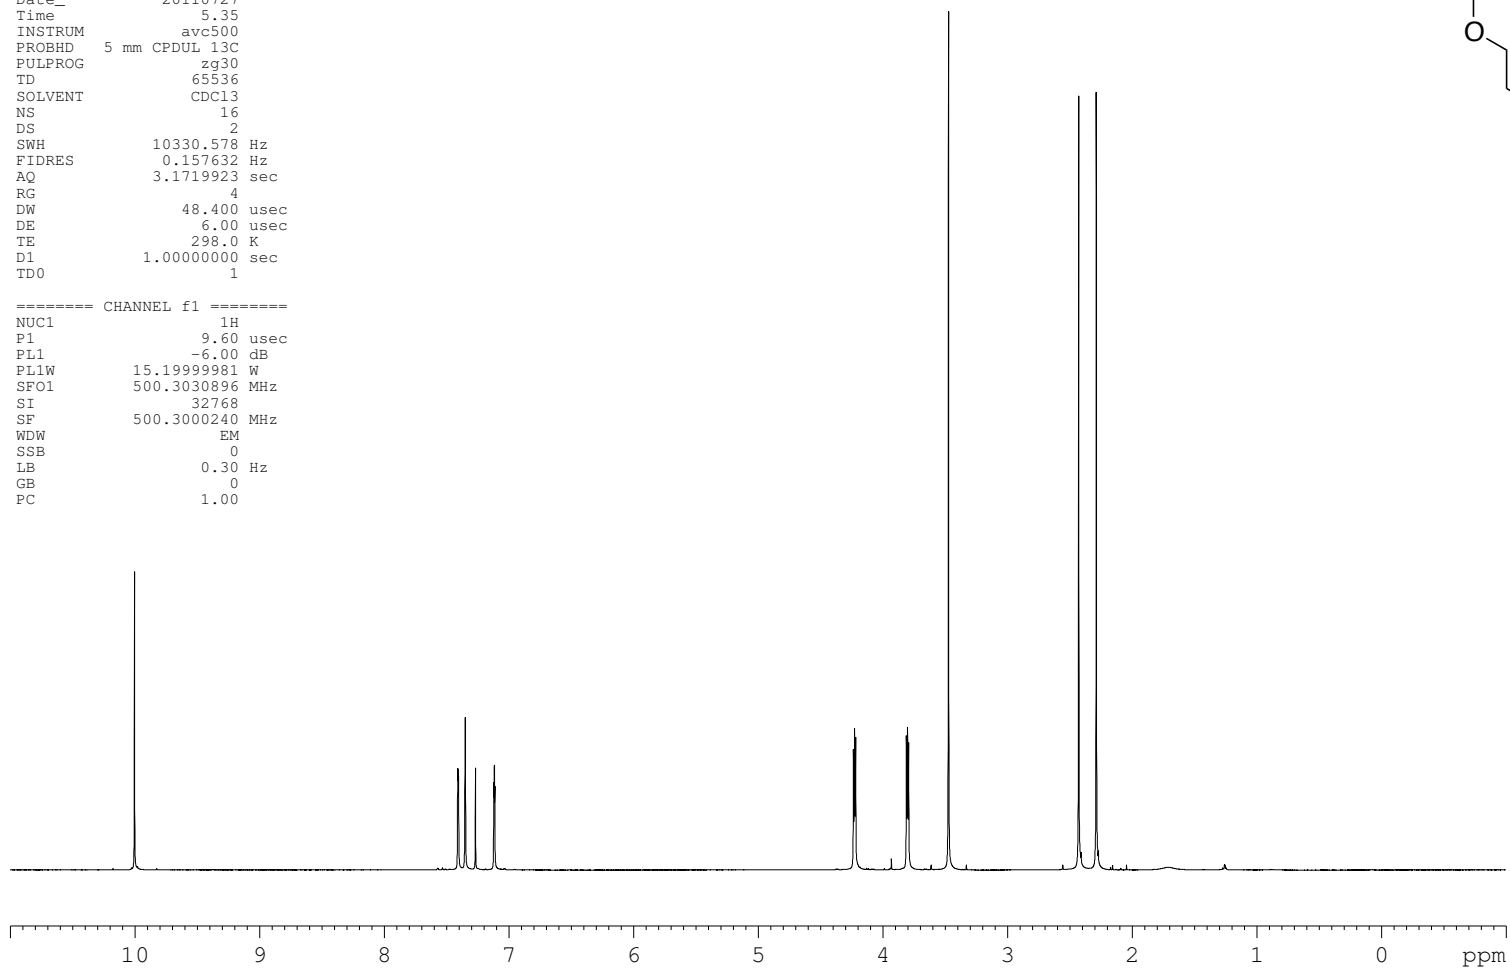

3-(3,5-Dimethylisoxazol-4-yl)-5-(2-methoxyethoxy)benzaldehyde **19** <sup>13</sup>C NMR

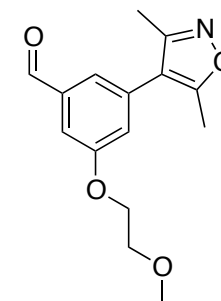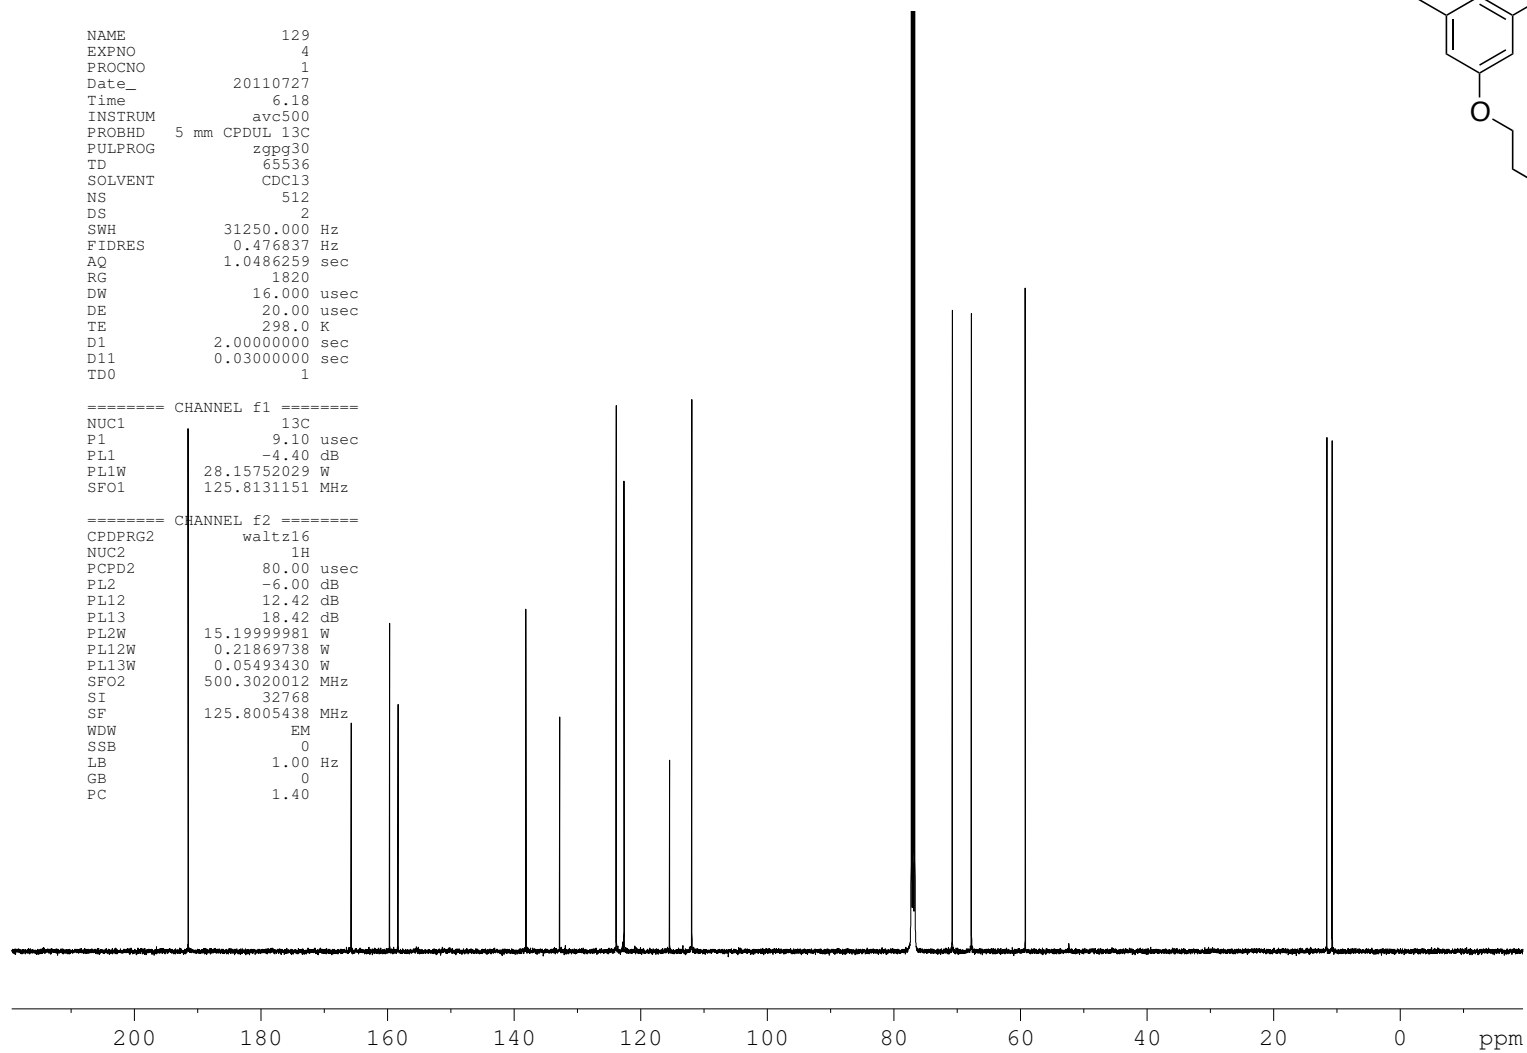



3-(3,5-Dimethylisoxazol-4-yl)-5-(2-hydroxyethoxy)benzaldehyde **20** <sup>1</sup>H NMR

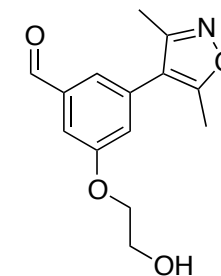

NAME 126  
EXPNO 1  
PROCNO 1  
Date\_ 20110827  
Time 5.36  
INSTRUM ave500  
PROBHD 5 mm CPDUL 13C  
PULPROG zg30  
TD 65536  
SOLVENT CDCl3  
NS 16  
DS 2  
SWH 10330.578 Hz  
FIDRES 0.157632 Hz  
AQ 3.1719923 sec  
RG 4  
DW 48.400 usec  
DE 6.00 usec  
TE 298.0 K  
D1 1.0000000 sec  
TD0 1

===== CHANNEL f1 =====  
NUC1 1H  
P1 9.60 usec  
PL1 -6.00 dB  
PL1W 15.19999981 W  
SFO1 500.3030896 MHz  
SI 32768  
SF 500.3000240 MHz  
WDW EM  
SSB 0  
LB 0.30 Hz  
GB 0  
PC 1.00

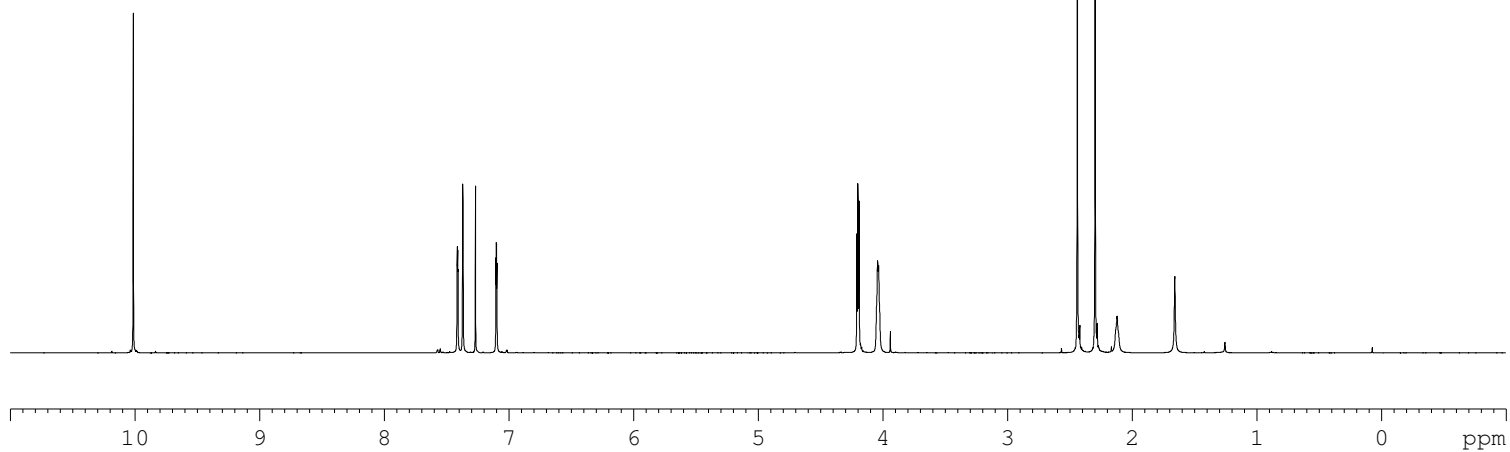

3-(3,5-Dimethylisoxazol-4-yl)-5-(2-hydroxyethoxy)benzaldehyde **20**  $^{13}\text{C}$  NMR

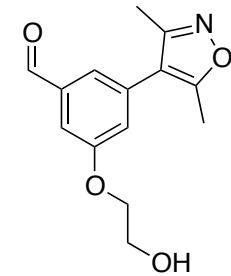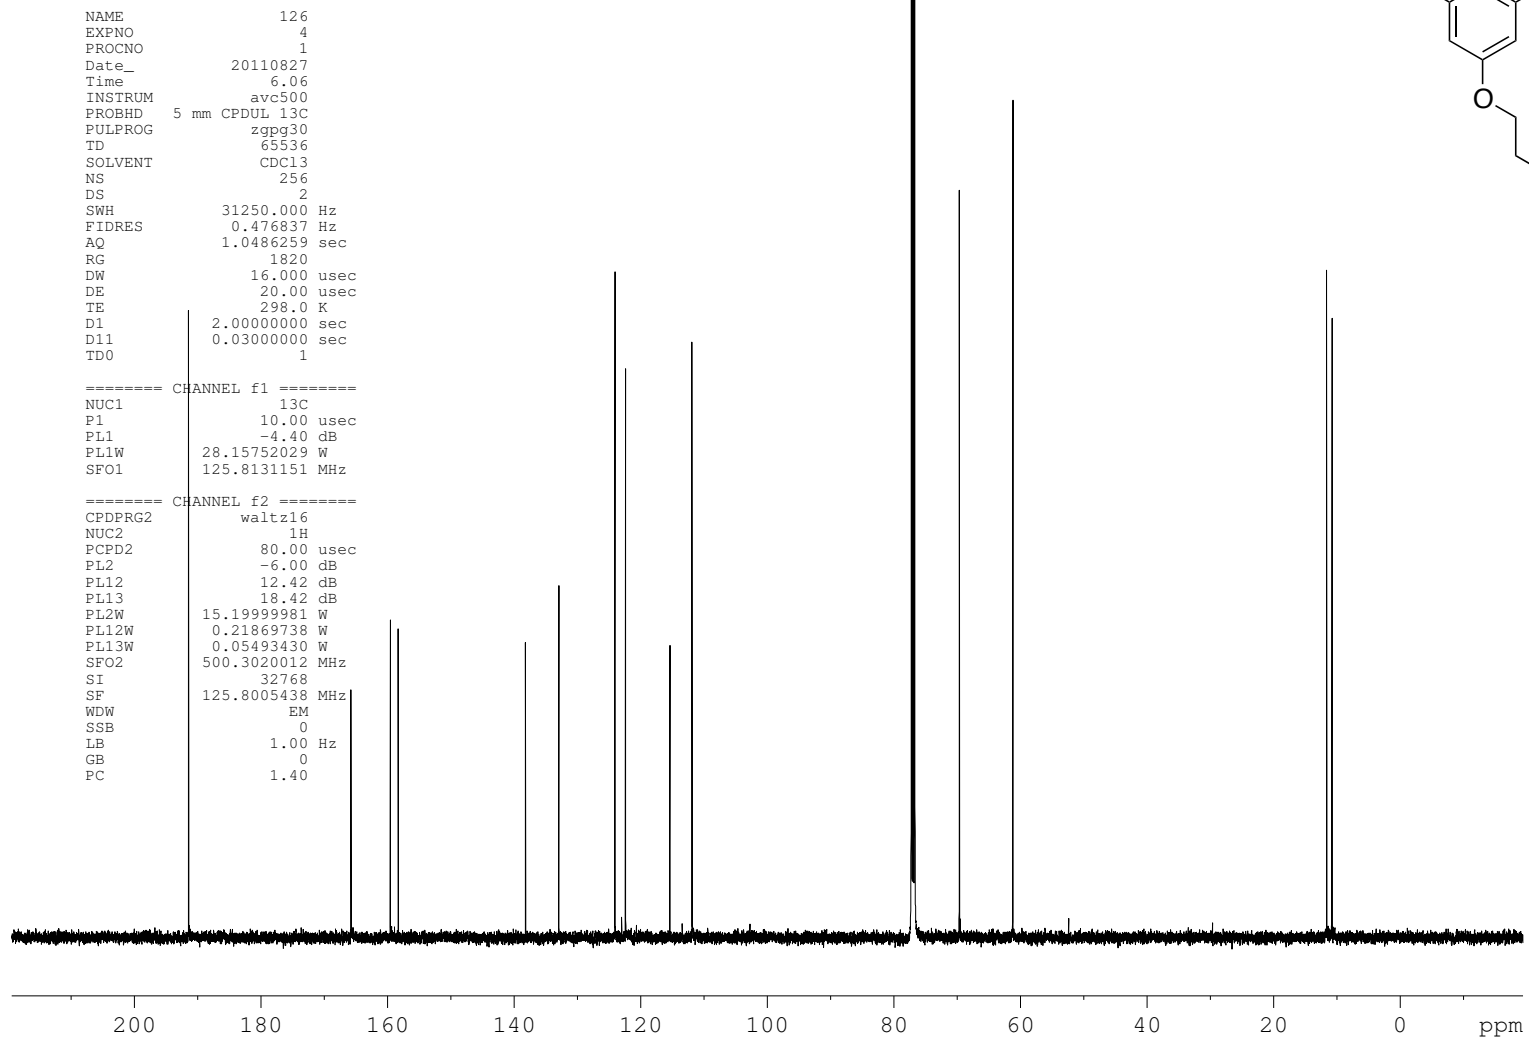

(3-(3,5-Dimethylisoxazol-4-yl)-5-methoxyphenyl)(phenyl)methanol **21** <sup>1</sup>H NMR

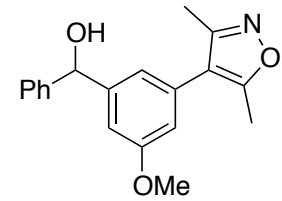

NAME 128  
EXPNO 1  
PROCNO 1  
Date\_ 20110803  
Time 18.17  
INSTRUM ave500  
PROBHD 5 mm CPDUL 13C  
PULPROG zg30  
TD 65536  
SOLVENT CDCl3  
NS 16  
DS 2  
SWH 10330.578 Hz  
FIDRES 0.157632 Hz  
AQ 3.1719923 sec  
RG 4  
DW 48.400 usec  
DE 6.00 usec  
TE 298.0 K  
D1 1.0000000 sec  
TD0 1

===== CHANNEL f1 =====  
NUC1 1H  
P1 9.60 usec  
PL1 -6.00 dB  
PL1W 15.19999981 W  
SFO1 500.3030896 MHz  
SI 32768  
SF 500.3000240 MHz  
WDW EM  
SSB 0  
LB 0.30 Hz  
GB 0  
PC 1.00

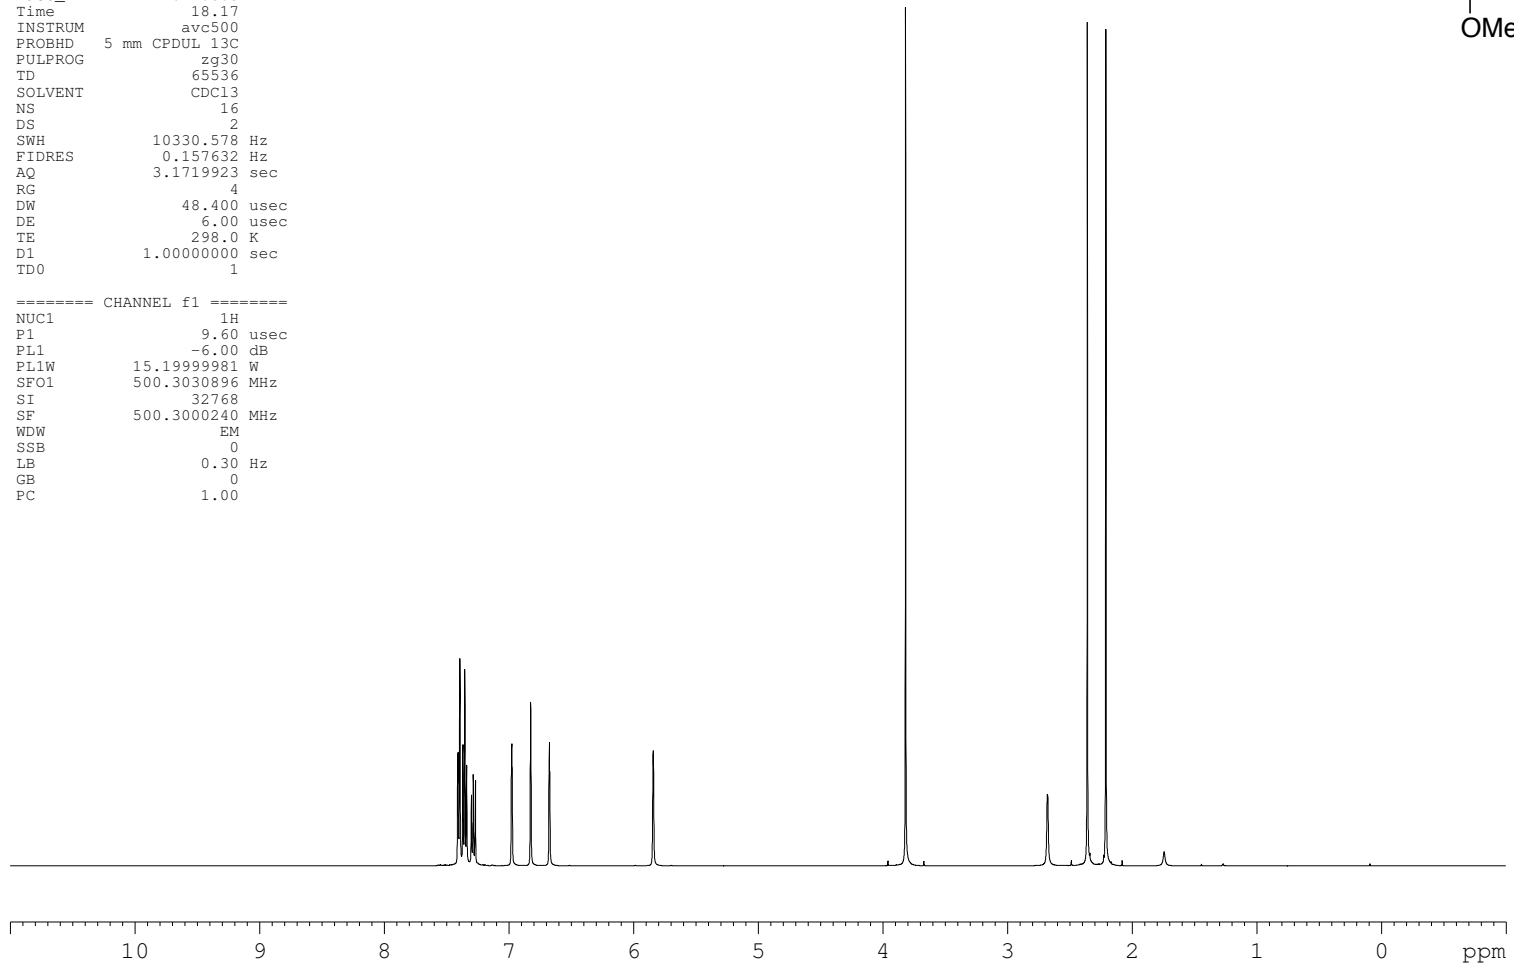

(3-(3,5-Dimethylisoxazol-4-yl)-5-methoxyphenyl)(phenyl)methanol **21** <sup>13</sup>C NMR

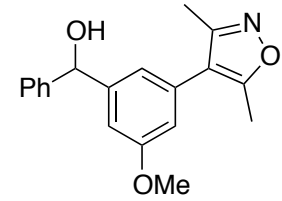

```
NAME          128
EXPNO         4
PROCNO        1
Date_         20110803
Time          19.00
INSTRUM       avc500
PROBHD        5 mm CPDUL 13C
PULPROG       zgpg30
TD            65536
SOLVENT       CDCl3
NS            512
DS            2
SWH           31250.000 Hz
FIDRES        0.476837 Hz
AQ            1.0486259 sec
RG            1820
DW            16.000 usec
DE            20.00 usec
TE            298.0 K
D1            2.00000000 sec
D11           0.03000000 sec
TD0           1
```

```
===== CHANNEL f1 =====
NUC1           13C
P1             9.10 usec
PL1            -4.40 dB
PL1W           28.15752029 W
SFO1           125.8131151 MHz
```

```
===== CHANNEL f2 =====
CPDPRG2       waltz16
NUC2           1H
PCPD2          80.00 usec
PL2            -6.00 dB
PL12           12.42 dB
PL13           18.42 dB
PL2W           15.19999981 W
PL12W          0.21869738 W
PL13W          0.05493430 W
SFO2           500.3020012 MHz
SI             32768
SF             125.8005438 MHz
WDW            EM
SSB            0
LB             1.00 Hz
GB             0
PC             1.40
```

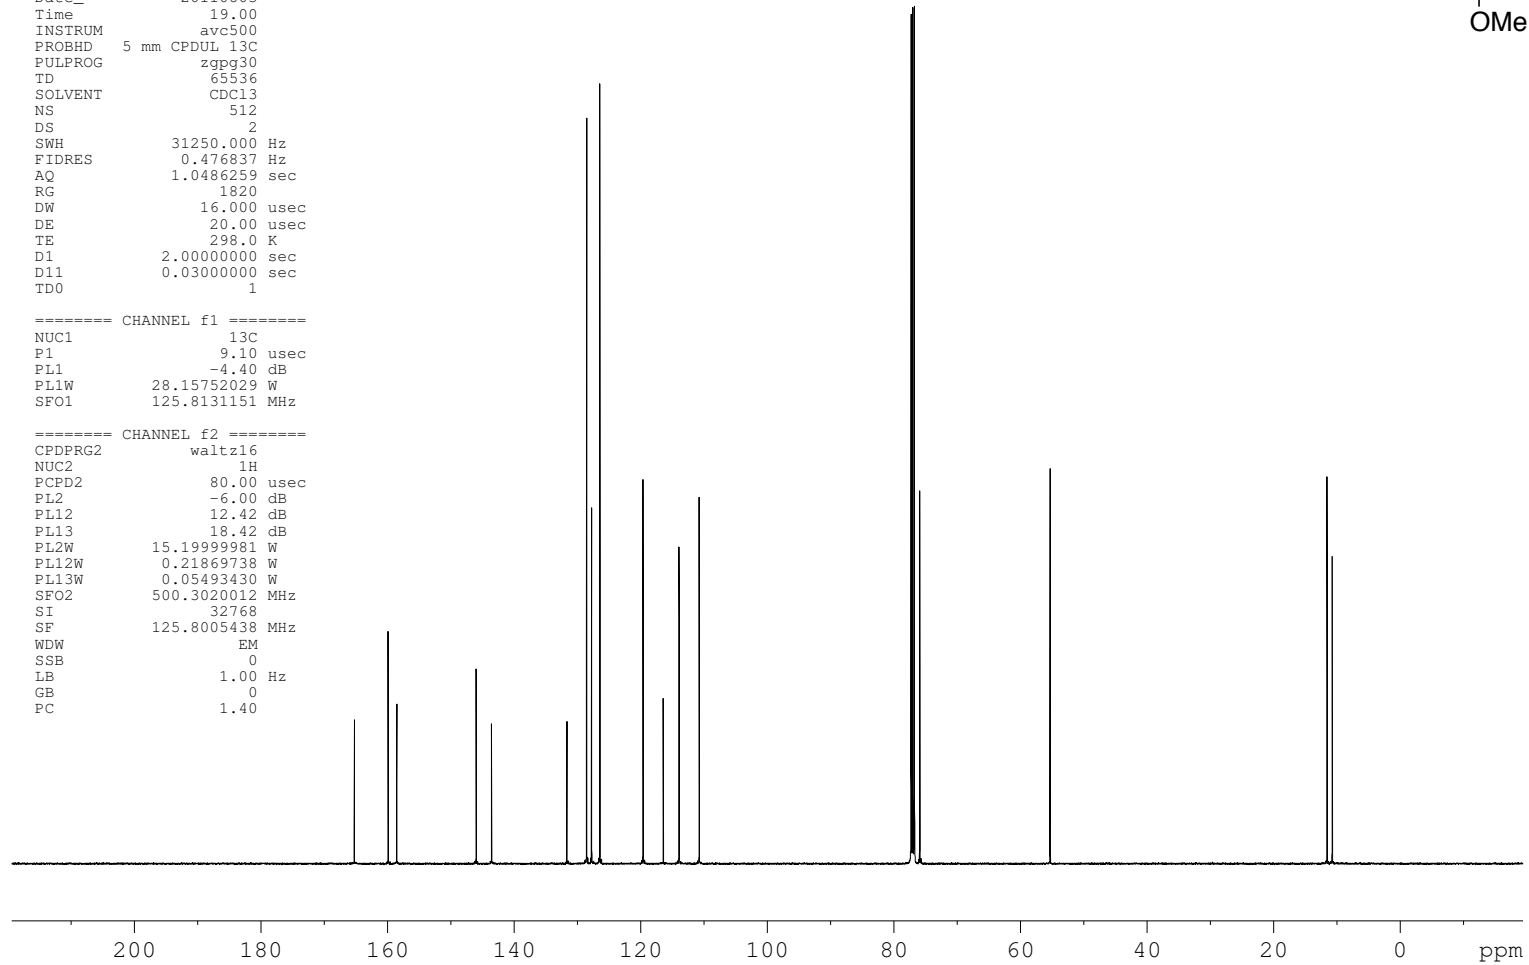

(3-(3,5-Dimethylisoxazol-4-yl)-5-(2-methoxyethoxy)phenyl)(phenyl)methanol **22** <sup>1</sup>H NMR

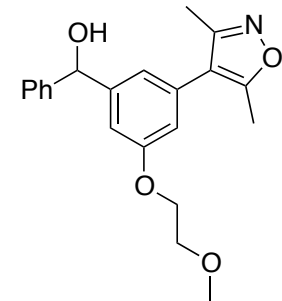

NAME 133  
EXPNO 1  
PROCNO 1  
Date\_ 20110803  
Time\_ 19.38  
INSTRUM ave500  
PROBHD 5 mm CPDUL 13C  
PULPROG zg30  
TD 65536  
SOLVENT CDCl3  
NS 16  
DS 2  
SWH 10330.578 Hz  
FIDRES 0.157632 Hz  
AQ 3.1719923 sec  
RG 4  
DW 48.400 usec  
DE 6.00 usec  
TE 298.0 K  
D1 1.0000000 sec  
TD0 1

===== CHANNEL f1 =====  
NUC1 1H  
P1 9.60 usec  
PL1 -6.00 dB  
PL1W 15.19999981 W  
SFO1 500.3030896 MHz  
SI 32768  
SF 500.3000240 MHz  
WDW EM  
SSB 0  
LB 0.30 Hz  
GB 0  
PC 1.00

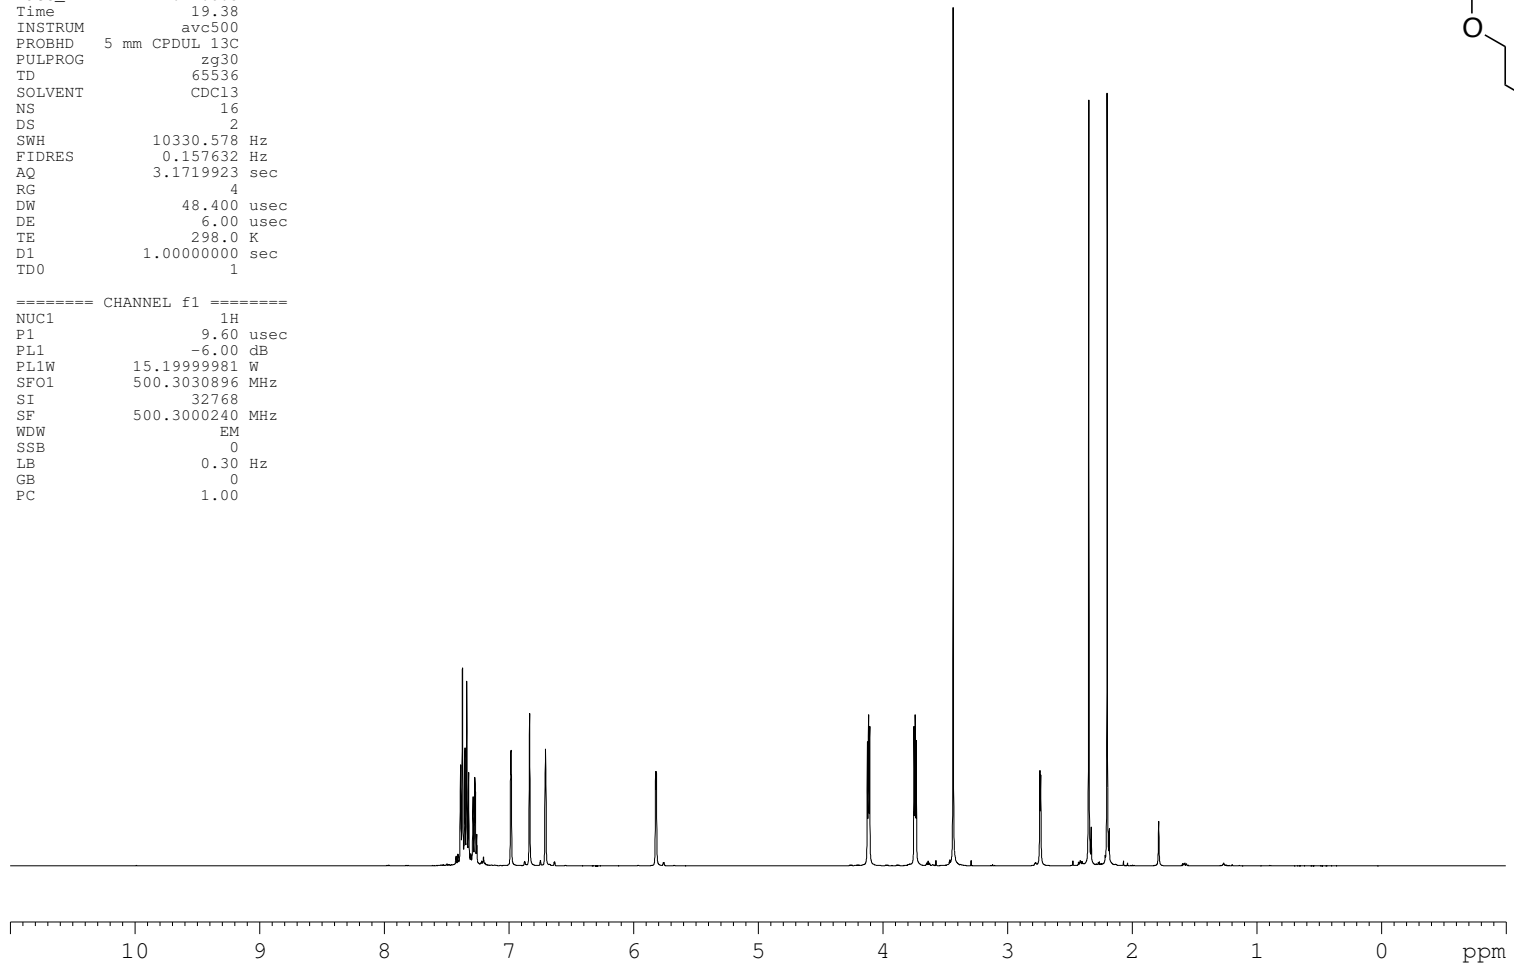

(3-(3,5-Dimethylisoxazol-4-yl)-5-(2-methoxyethoxy)phenyl)(phenyl)methanol **22** <sup>13</sup>C NMR

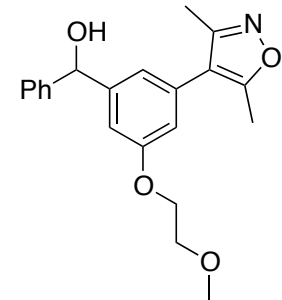

```
NAME          133
EXPNO         4
PROCNO        1
Date_         20110803
Time          20.21
INSTRUM       avc500
PROBHD        5 mm CPDUL 13C
PULPROG       zgpg30
TD            65536
SOLVENT       CDCl3
NS            512
DS            2
SWH           31250.000 Hz
FIDRES        0.476837 Hz
AQ            1.0486259 sec
RG            1820
DW            16.000 usec
DE            20.00 usec
TE            298.0 K
D1            2.00000000 sec
D11           0.03000000 sec
TD0           1
```

```
===== CHANNEL f1 =====
NUC1           13C
P1             9.10 usec
PL1            -4.40 dB
PL1W           28.15752029 W
SFO1           125.8131151 MHz
```

```
===== CHANNEL f2 =====
CPDPRG2       waltz16
NUC2           1H
PCPD2         80.00 usec
PL2            -6.00 dB
PL12           12.42 dB
PL13           18.42 dB
PL2W           15.19999981 W
PL12W          0.21869738 W
PL13W          0.05493430 W
SFO2           500.3020012 MHz
SI             32768
SF             125.8005438 MHz
WDW            EM
SSB            0
LB             1.00 Hz
GB             0
PC             1.40
```

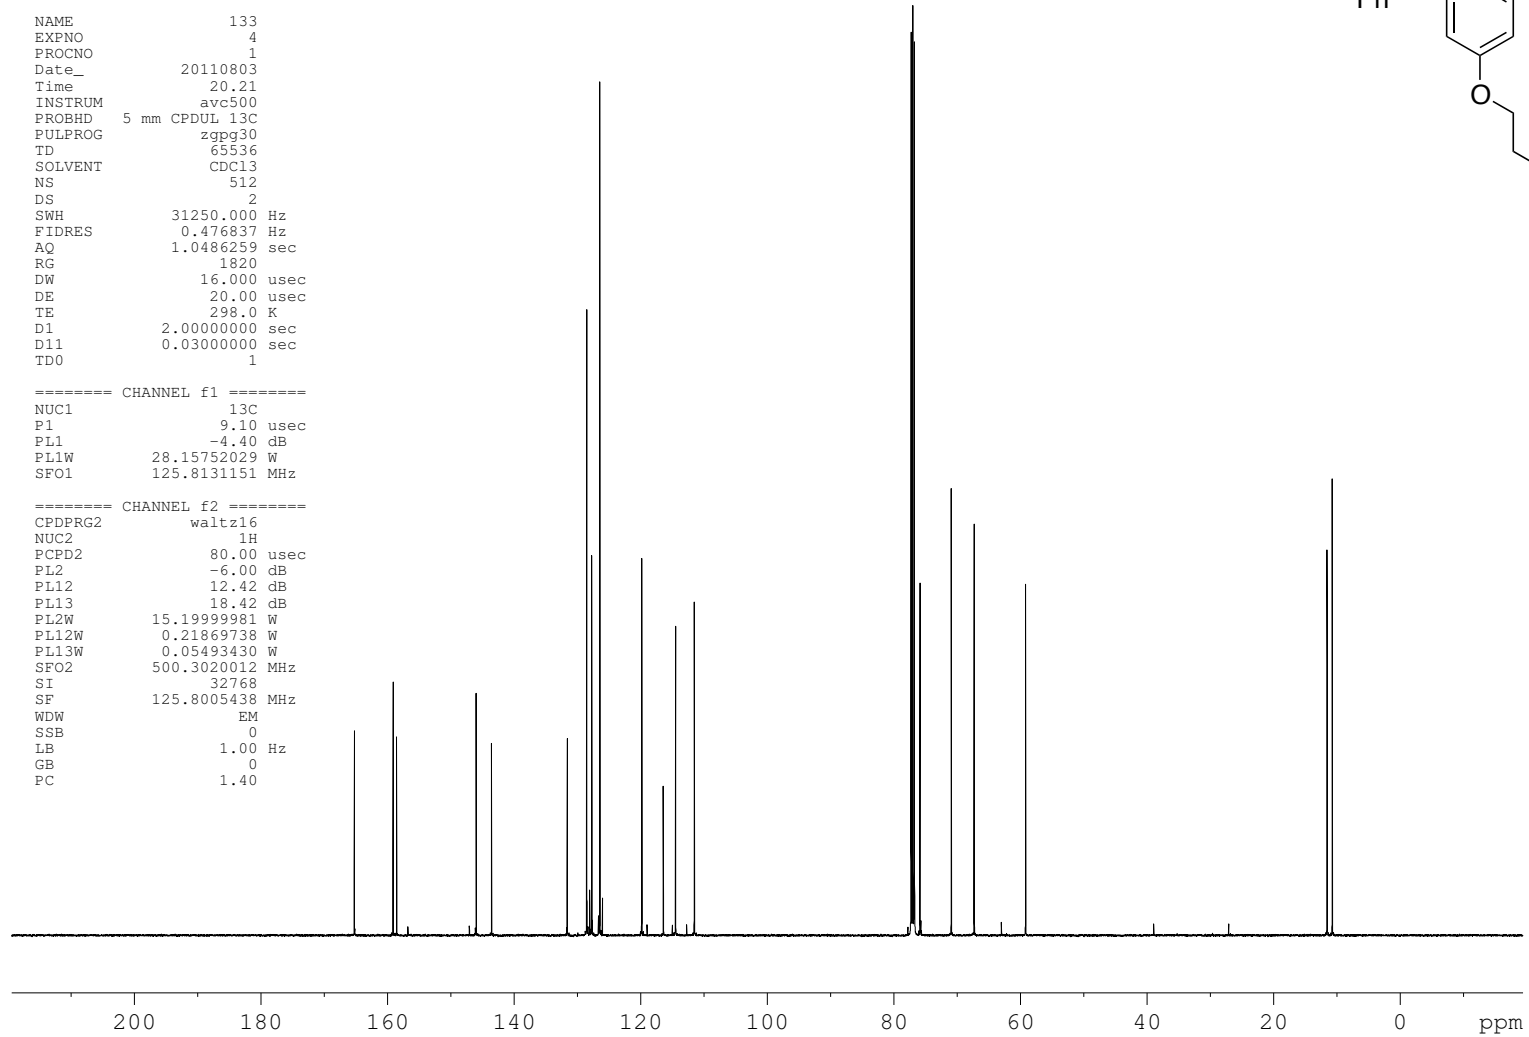

2-(3-(3,5-Dimethylisoxazol-4-yl)-5-(hydroxy(phenyl)methyl)phenoxy)ethanol **23** <sup>1</sup>H NMR

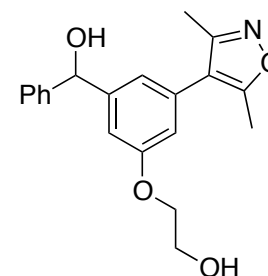

```

NAME          134
EXPNO         1
PROCNO        1
Date_         20110805
Time          23.49
INSTRUM       ave500
PROBHD        5 mm CPDUL 13C
PULPROG       zg30
TD            65536
SOLVENT       DMSO
NS            16
DS            2
SWH           10330.578 Hz
FIDRES        0.157632 Hz
AQ            3.1719923 sec
RG            4
DW            48.400 usec
DE            6.00 usec
TE            298.0 K
D1            1.0000000 sec
TD0           1
    
```

```

===== CHANNEL f1 =====
NUC1          1H
P1            9.60 usec
PL1          -6.00 dB
PL1W         15.19999981 W
SFO1         500.3030896 MHz
SI           32768
SF           500.3000000 MHz
WDW           EM
SSB           0
LB           0.30 Hz
GB           0
PC           1.00
    
```

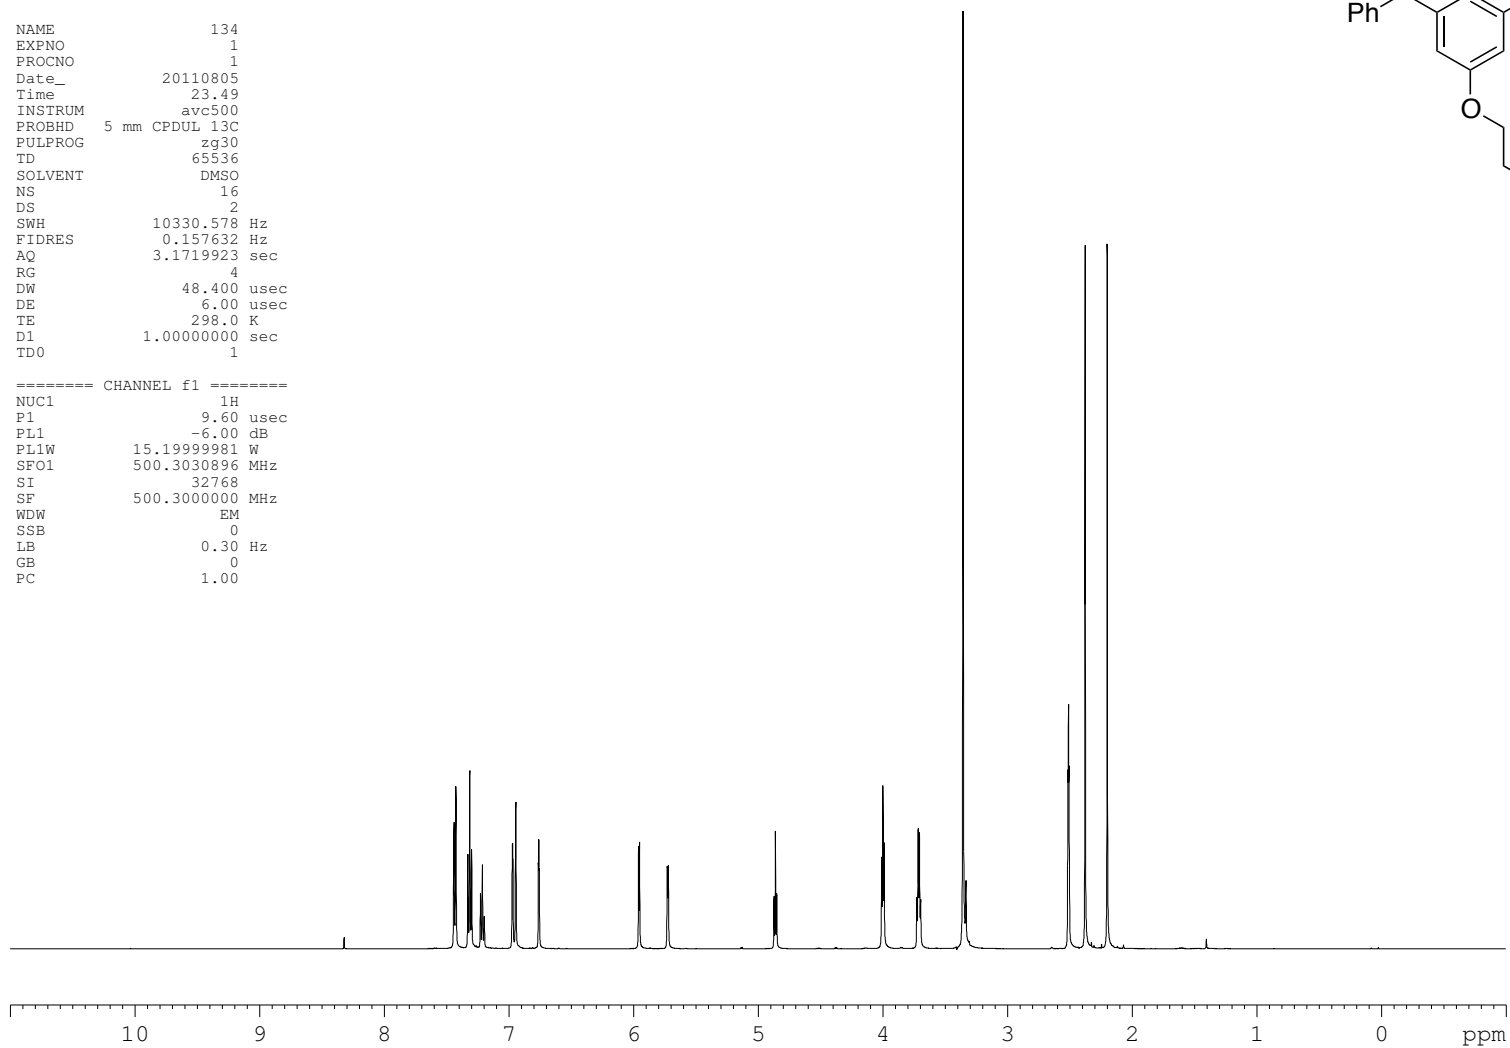

2-(3-(3,5-Dimethylisoxazol-4-yl)-5-(hydroxy(phenyl)methyl)phenoxy)ethanol **23** <sup>13</sup>C NMR

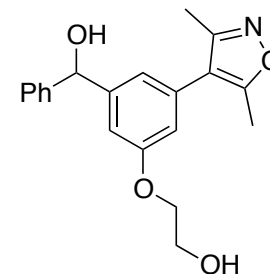

```

NAME          134
EXPNO         4
PROCNO        1
Date_         20110806
Time          0.32
INSTRUM       avc500
PROBHD        5 mm CPDUL 13C
PULPROG       zgpg30
TD            65536
SOLVENT       DMSO
NS            512
DS            2
SWH           31250.000 Hz
FIDRES        0.476837 Hz
AQ            1.0486259 sec
RG            1820
DW            16.000 usec
DE            20.00 usec
TE            298.0 K
D1            2.00000000 sec
D11           0.03000000 sec
TD0           1
    
```

```

===== CHANNEL f1 =====
NUC1          13C
P1            9.10 usec
PL1           -4.40 dB
PL1W          28.15752029 W
SFO1          125.8131151 MHz
    
```

```

===== CHANNEL f2 =====
CPDPRG2       waltz16
NUC2          1H
PCPD2         80.00 usec
PL2           -6.00 dB
PL12          12.42 dB
PL13          18.42 dB
PL2W          15.19999981 W
PL12W         0.21869738 W
PL13W         0.05493430 W
SFO2          500.3020012 MHz
SI            32768
SF            125.8005954 MHz
WDW           EM
SSB           0
LB            1.00 Hz
GB            0
PC            1.40
    
```

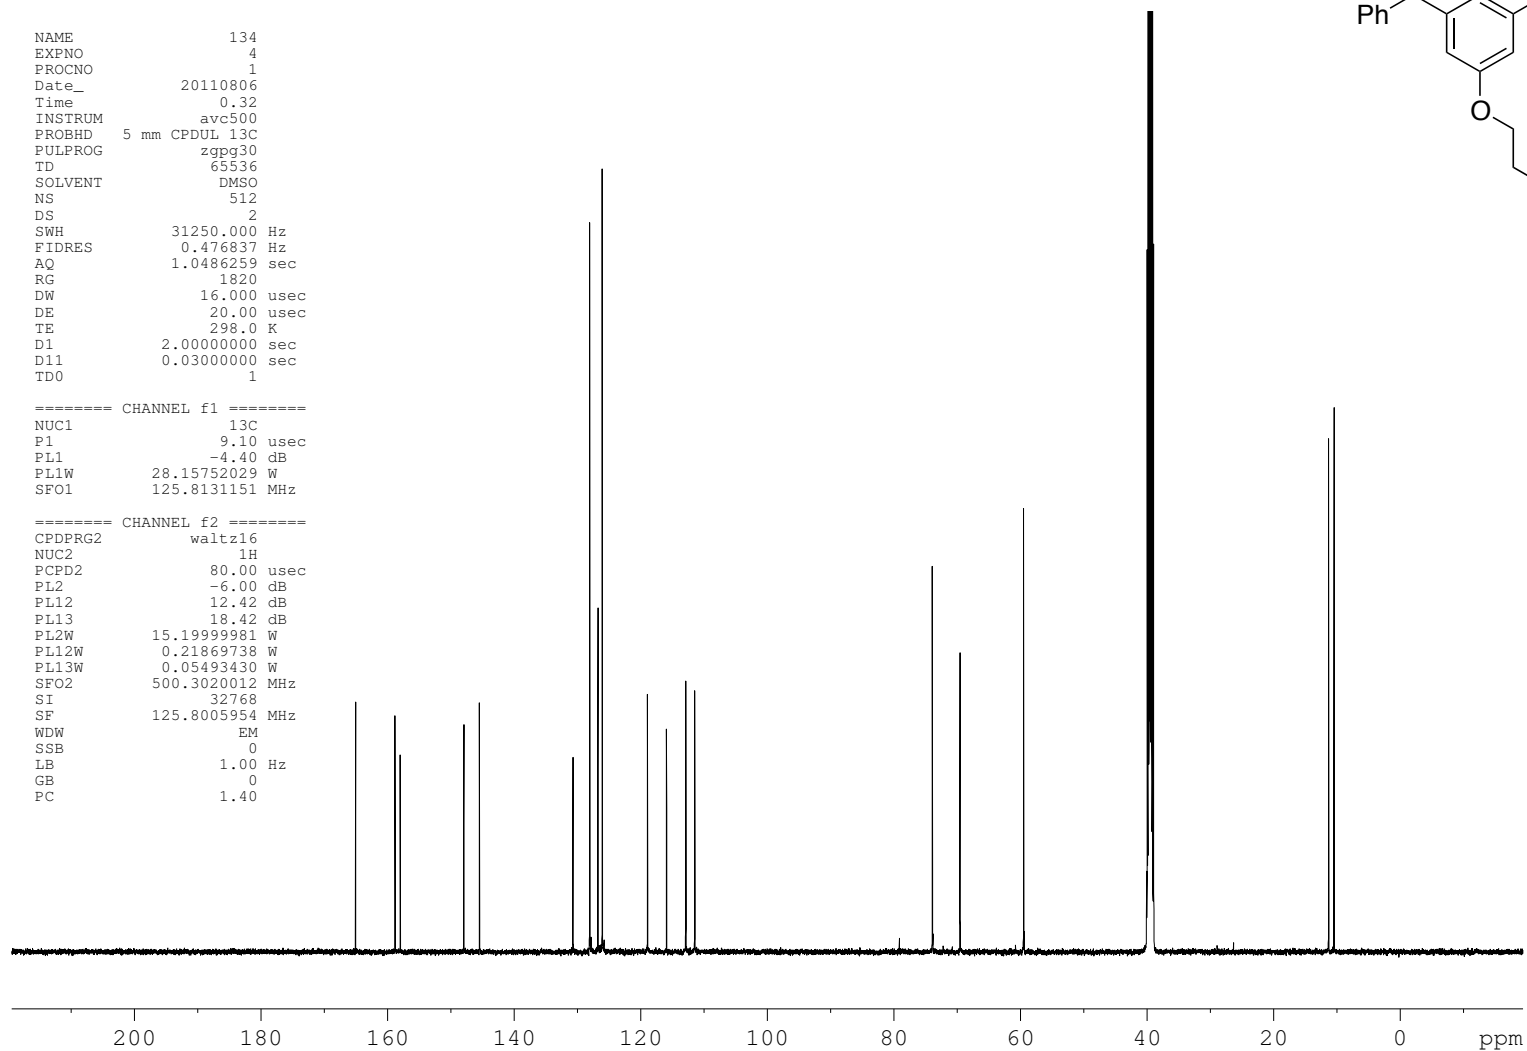

Supplement: jm301588r_si_001.pdf [file jm301588r_si_001.pdf]
